# Supplementary material for: Construction of a novel five programmed cell death-related gene signature as a promising prognostic model for triple negative breast cancer
Source: PeerJ. 2025 Apr 28;13:e19359. doi: 10.7717/peerj.19359 (PMC12045267; doi:10.7717/peerj.19359)
Supplement: Supplemental Information 1 [file peerj-13-19359-s001.xlsx]

## Sheet: Sheet1
apoptosis	pyroptosis	ferroptosis	autophagy	cuproptosis	parthanatos	entotic cell death	netotic cell death	lysosome-dependent cell death	alkaliptosis	oxeiptosis
AATF	BAK1	ABCC1	ABL1	FDX1	PARP	AMPK	ELANE	ABCA2	IKBKB	PGAM5
ABL1	BAX	ACACA	ABL2	LIAS	MIF	ATG5	MMP1	ABCB9	NFKB1	KEAP1
ACAA2	CASP1	ACO1	ACER2	LIPT1	AIFM1	ATG7	MPO	ACP2	CA9	AIFM1
ACKR3	CASP3	ACSF2	ADRA1A	DLD	HSP70	BECN1	CAMP	ACP5	CHUK	NRF2
ACVR1	CASP4	ACSL1	ADRB2	DLAT	PAAN	CDC42	PADI4	ADGRE2	IKBKG	AIRE
ACVR1B	CASP5	ACSL3	AIFM1	PDHA1	ARH3	CDH1	EIPA	AGA	NFKB1A
ADORA1	CASP6	ACSL4	AKT1	PDHB	RNF146	CTNNA1	NCX1	AP1B1	RELA
AEN	CASP8	ACSL5	ALOX15	MTF1	ADPRHL2	CYBB	MIA	AP1G1
AGT	CASP9	ACSL6	AMBRA1	GLS	OGG1	MYH14		AP1M1
AGTR2	CHMP2A	AIFM2	ATF6	CDKN2A		PI3KC3		AP1M2
AIFM1	CHMP2B	AKR1C1	ATG101	GCSH		RHOA		AP1S1
AKT1	CHMP3	AKR1C2	ATG13	ATP7A		RNF146		AP1S2
ANXA6	CHMP4A	AKR1C3	ATG14	ATP7B		ROCK		AP1S3
APAF1	CHMP4B	ALOX12	ATG2A	SLC31A1		RUBCN		AP3B1
APPL1	CHMP4C	ALOX15	ATG2B			UVRAG		AP3B2
AR	CHMP6	ALOX5	ATG5					AP3D1
ARHGEF2	CHMP7	ATG5	ATG7					AP3M1
ARL6IP5	CYCS	ATG7	ATM					AP3M2
ARMC10	ELANE	ATP5MC3	ATP13A2					AP3S1
ARRB2	GPX4	BACH1	ATP6V0A1					AP3S2
ASAH2	GSDMB	CARS	ATP6V0A2					AP4B1
ATF3	GSDMC	CBS	ATP6V0B					AP4E1
ATF4	GSDMD	CD44	ATP6V0C					AP4M1
ATM	GSDME	CHAC1	ATP6V0D1					AP4S1
ATP2A1	GZMB	CISD1	ATP6V0D2					ARF1
ATP2A3	HMGB1	CP	ATP6V0E1					ARL8B
ATP5IF1	IL18	CRYAB	ATP6V0E2					ARSA
AVP	IL1A	CS	ATP6V1A					ARSB
BAD	IL1B	CYBB	ATP6V1B					ARSG
BAG3	IRF1	DPP4	ATP6V1B2					ASAH1
BAG5	IRF2	EMC2	ATP6V1C1					ATP10B
BAG6	NLRC4	FADS2	ATP6V1C2					ATP13A2
BAK1	NLRP1	FANCD2	ATP6V1D					ATP6ÁP1
BAX	NLRP2	FDFT1	ATP6V1E1					ATP6V0A1
BBC3	NLRP3	FTH1	ATP6V1E2					ATP6V0A2
BCAP31	NLRP6	FTL	ATP6V1G1					ATP6V0A4
BCL10	NLRP7	FTMT	ATP6V1G2					ATP6V0B
BCL2	NOD1	G6PD	ATP6V1H					ATP6V0C
BCL2A1	PLCG1	GCLC	AUP1					ATP6V0D1
BCL2L1	PIVK	GCLM	BAD					ATP6V0D2
BCL2L10	PRKACA	GLS2	BAG3					ATP6V1H
BCL2L11	PYCARD	GOT1	BAX					BLK
BCL2L12	SCAF11	GPX4	BCL2					BLOC1S1
BCL2L14	TINAP	GSS	BCL2L11					BLOC1S2
BCL2L2	TNF	HMGCR	BECN1					BORCS5
BCL3	TP53	HMOX1	BID					BORCS6
BCLAF1	TP63	HSBP1	BIRC2					BTK
BDKRB2	AIM2	HSPB1	BIRC3					C12orf4
BDNF	GSDMA	KEAP1	BMF					CBL
BECN1	IL6	LPCAT3	BNIP3					CD164
BID	NOD2	MAP1LC3A	BNIP3L					CD300A
BIK	TIRAP	MAP1LC3B	BOK					CD63
BIRC6		MAP1LC3C	C9orf72					CD68
BLOC1S2		MT1G	CALCOCO2					CD84
BMF		NCOA4	CAMK2					CHGA
BMP4		NFE2L2	CAMKK2					CLN3
BMP5		NFS1	CAPN1					CLN5
BMPR1B		NOX1	CAPN2					CLNK
BNIP3		NQO1	CAPNS1					CLTA
BNIP3L		NRF2	CASP1					CLTB
BOK		OTUB1	CASP3					CLTC
BRCA1		PCBP1	CASP8					CLTCL1
BRCA2		PCBP2	CDK5					CLU
BRSK2		PEBP1	CDK5R1					CPLX2
BTK		PGD	CDXC37					CTNS
CAAP1		PHKG2	CFLAR					CTSA
CASP1		PRNP	CHMP1					CTSB
CASP10		PROM2	CHMP2A					CTSC
CASP12		PTGS2	CHMP2B					CTSD
CASP2		RPL8	CHMP4A					CTSE
CASP3		SAT1	CHMP4B					CTSF
CASP4		SAT2	CHMP4C					CTSG
CASP5		SLC11A2	CHMP5					CTSH
CASP8		SLC1A5	CHMP6					CTSK
CASP8AP2		SLC39A14	CHMP7					CTSL
CASP9		SLC39A8	CISD2					CTSO
CAV1		SLC3A2	CLEC16A					CTSS
CCAR2		SLC40A1	CLN3					CTSV
CCK		SLC7A11	CLU					CTSW
CD14		SQLE	CPTP					CTSZ
CD24		STEAP3	CSNK2A2					DEF8
CD27		TF	CTSA					DNASE2
CD28		TFRC	CTTN					DNASE2B
CD38		TP53	CYLD					ENTPD4
CD3E		VDAC2	DAP					FAM98A
CD44		VDAC3	DAPK1					FER
CD5		ZEB1	DAPK2					FES
CD70			DAPK3					FGR
CD74			DAPL1					FLCN
CDIP1			DCN					FOXF1
CDKN1A			DDIT3					FTH1
CDKN2D			DDRGK1					FTL
CEBPB			DEPDC5					FUCA1
CFLAR			DEPP1					GAA
CHAC1			DHRSX					GAB2
CHCHD10			DNM1L					GALC
CHEK2			DRAM1					GALNS
CIB1			DRAM2					GATA2
CIDEB			EEF1A1					GBA
CLU			EEF1A2					GCC2
COA8			EIF2AK2					GGA1
COL2A1			EIF2AK4					GGA2
CRADD			EIF4G1					GGA3
CREB3			EIF4G2					GLA
CREB3L1			ELAPOR1					GLB1
CRH			EP300					GM2A
CRIP1			EPM2A					GNPTAB
CSF2			ERCC4					GNPTG
CSNK2A1			ERN1					GNS
CSNK2A2			EXOC1					GUSB
CTH			EXOC4					HDAC6
CTNNA1			EXOC7					HEXA
CTSC			EXOC8					HEXB
CTTN			FADD					HGS
CUL1			FAF1					HGSNAT
CUL2			FBXL2					HMOX1
CUL3			FBXO7					HPS6
CUL4A			FBXW7					HSPA8
CUL5			FEZ1					HYAL1
CX3CL1			FEZ2					IDS
CX3CR1			FLCN					IDUA
CXCL12			FOXK1					IGF2R
CYLD			FOXK2					IL13
CYP1B1			FOXO1					IL13RA2
DAB2IP			FOXO3					IL4
DAP			FTH1					IL4R
DAP3			FTL					KIF1B
DAPK1			FYCO1					KIT
DAPK2			FZD5					KXD1
DAPK3			GAPDH					LAMP1
DAPL1			GATA4					LAMP2
DAXX			GBA					LAMP3
DBH			GFAP					LAMTOR1
DCC			GLNA					LAPTM4A
DDIAS			GLUD1					LAPTM4B
DDIT3			GLUD2					LAPTM5
DDIT4			GNAI3					LAT
DDX3X			GOLGA2					LAT2
DDX47			GPR137					LGALS9
DDX5			GPR137B					LGMN
DEDD			GPSM1					LIPA
DEDD2			GSK3A					LRRK2
DELE1			GSK3B					LYN
DEPTOR			H2A					M6PR
DIABLO			HAX1					MAN2B1
DIDO1			HDAC6					MANBA
DNAJA1			HERC1					MAP1LC3A
DNAJC10			HGF					MAP6
DNM1L			HIF1A					MCOLN1
DPF2			HMGB1					MFSD8
DYRK2			HMOX1					MILR1
E2F1			HSP90A					MRGPRX2
E2F2			HSP90AA1					MT3
EDA2R			HSPA8					MYH9
EIF2AK3			HSPB1					NAGA
ELL3			HSPB8					NAGLU
ENO1			HTR2B					NAGPA
EP300			HTRA2					NAPSA
EPHA2			HTT					NCOA4
EPO			HUWE1					NDEL1
ERBB3			IFI16					NEDD4
ERCC6			IFNA					NEU1
ERN1			IFNAR1					NPC1
ERN2			IFNAR2					NPC2
ERO1A			IFNB					NR4A3
ERP29			IFNG					PDPK1
EYA1			IFNGR1					PIK3C3
EYA2			IFNGR2					PIK3CD
EYA3			IKBKG					PIK3CG
EYA4			IL10					PIP4K2A
FADD			IL10RA					PIP4K2B
FAF1			IL1A					PIP4P1
FAIM			IL1B					PLA2G15
FAIM2			IL33					PLA2G3
FAM162A			IL4					PLEKHM1
FAS			IRF9					PLEKHM2
FASLG			IRGM					PPT1
FASTK			ITPR1					PPT2
FBH1			JAK1					PSAP
FBXW7			JAK2					PSAPL1
FEM1B			JAK3					PTGDR
FGA			JNK					PTGDS
FGB			KAT5					RAB34
FGF10			KAT8					RAB3A
FGFR1			KDM4A					RAB7A
FGFR3			KDR					RAC2
FGG			KEAP1					RUBCNL
FHIT			KIF25					S100A13
FIGNL1			KLHL22					SCARB2
FIS1			KLHL3					SGSH
FNIP2			LACRT					SLC11A1
FXN			LAMP1					SLC11A2
FYN			LAMP2					SLC17A5
FZD9			LAMP3					SMPD1
G0S2			LAMTOR1					SNAP23
GABARAP			LAMTOR2					SNAPIN
GATA1			LAMTOR3					SNX16
GATA4			LAMTOR4					SNX4
GCLM			LAMTOR5					SORL1
GDNF			LARP1					SORT1
GFRAL			LEP					SPAG9
GGCT			LEPR					SPHK2
GHITM			LGALS8					SQSTM1
GNAI2			LRRK2					STXBP1
GNAI3			LRSAM1					STXBP2
GPER1			LZTS1					SUMF1
GPX1			MAP1LC3A					SYK
GRINA			MAP1LC3B					SYTL4
GSDME			MAP1LC3C					TCIRG1
GSK3A			MAP3K7					TFEB
GSK3B			MAPK15					TMEM106B
GSKIP			MAPK3					TPP1
GSTP1			MAPK8					UNC13D
GZMB			MAPT					VAMP7
HDAC1			MCL1					VAMP8
HERPUD1			MEFV					VPS33A
HGF			MET					VPS33B
HIC1			MFN2					VPS4A
HIF1A			MFSD8					WASH3P
HINT1			MID2					ZFYVE16
HIP1			MIR199A1
HIP1R			MIRLET7B
HIPK1			MLKL
HIPK2			MLST8
HMGB2			MT3
HMOX1			MTCL1
HNRNPK			MTDH
HRAS			MTM1
HRK			MTMR3
HSPA1A			MTMR4
HSPA1B			MTMR8
HSPB1			MTMR9
HTRA2			MTOR
HTT			NCOA4
HYAL2			NEDD4
HYOU1			NLRP3
ICAM1			NLRP6
IFI16			NOD1
IFI27			NOD2
IFI27L1			NOX2
IFI27L2			NPC1
IFI6			NPRL2
IENB1			NRBP2
IFNG			NUPR1
IGF1			OPTN
IKBKE			ORMDL3
IL12A			OSBPL7
IL19			PAFAH1B2
IL1A			PARK7
IL1B			PARP1
IL2			PGAM5
IL20RA			PHB2
IL33			PHF23
IL4			PIK3C2A
IL6R			PIK3C3
IL7			PIK3CA
INCA1			PIK3CB
ING2			PIK3R2
ING5			PIM2
INHBA			PINK1
INHBB			PIP4K2A
INS			PIP4K2B
ITGA6			PIP4K2C
ITGAM			PJVK
ITGAV			PLA2G4
ITM2C			PLEKHF1
ITPR1			PLK2
ITPR1P			PLK3
IVNS1ABP			POLDIP2
JAK2			PPIA
JMY			PPID
JUN			PRKAA1
KDM1A			PRKAA2
KITLG			PRKAB1
KRT18			PRKAB2
KRT8			PRKACA
LCK			PRKAG1
LGALS12			PRKAG2
LGALS3			PRKAG3
LRRK2			PRKD1
LTBR			PRKN
LY96			PSAP
MADD			PTPN22
MAEL			PYCARD
MAGEA3			PYG
MAP2K5			QSOX1
MAP3K5			RAB39B
MAPK7			RAB3GAP1
MAPK8			RAB3GAP2
MAPK8IP1			RAB7A
MAPK8IP2			RAB8A
MAPK9			RALB
MARCHF7			RASIP1
MAZ			RB1CC1
MCL1			RBCK1
MDM2			RETREG1
MELK			RETREG3
MFF			RHEB
MIF			RIPK1
MIR132			RIPK2
MIR15A			RIPK3
MIR16-1			RMC1
MIR17			RNF152
MIR198			RNF31
MIR21			RNF41
MIR210			RNF5
MIR221			ROCK1
MIR222			RPTOR
MIR26B			RRAGA
MIR27B			RRAGB
MIR449A			RRAGC
MKNK2			RRAGD
MLH1			RUBCN
MLLT11			RUFY4
MMP9			SCFD1
MNT			SCOC
MOAP1			SEC22B
MPV17L			SESN1
MSH2			SESN2
MSH6			SESN3
MSX1			SH3BP4
MUC1			SH3GLB1
MUL1			SHARPIN
MYBBP1A			SIRT1
NACC2			SIRT2
NANOS3			SLC25A4S
NBN			SLC38A9
NCK1			SMCR8
NCK2			SMG1
NDUFA13			SMPD1
NDUFS3			SNCA
NFATC4			SNRNP70
NFE2L2			SNX32
NGF			SNX5
NGFR			SNX6
NKX3-1			SOGA1
NLE1			SOGA3
NME5			SPATA2
NMT1			SPTLC1
NOC2L			SPTLC2
NOG			SQSTM1
NOL3			SREBF1
NONO			SREBF2
NOS3			STAT1
NOX1			STAT2
NR4A2			STAT3
NUPR1			STAT4
OPA1			STAT5A
P2RX4			STAT5B
P2RX7			STAT6
P4HB			STBD1
PAK2			STING1
PAK5			STK11
PARK7			STUB1
PARP1			SUPT5H
PARP2			SVIP
PAWR			SYNPO2
PCGF2			TAB2
PDCD10			TAB3
PDCD5			TBC1D14
PDCD6			TBC1D25
PDIA3			TBK1
PDK1			TEX264
PDK2			TFEB
PDPK1			TICAM1
PDX1			TIGAR
PEA15			TIRP
PELI3			TLK2
PERP			TLR3
PF4			TLR4
PHIP			TMEM150A
PHLDA3			TMEM150B
PIAS4			TMEM150C
PIDD1			TMEM39A
P1H1D1			TMEM39B
PIK3R1			TMEM59
PINK1			TNF
PLAGL2			TNFAIP3
PLAUR			TNFRSF10A
PLEKHF1			TNFRSF10B
PLSCR3			TNFRSF1A
PMAIP1			TNFRSF6
PML			TNFSF10
POLB			TNFSF6
POU4F1			TOMM7
POU4F2			TP53
PPARD			TP53INP1
PPIA			TP53INP2
PPIF			TPCN1
PPM1F			TPCN2
PPP1CA			TRADD
PPP1R13B			TRAF2
PPP1R15A			TRAF5
PPP2R1B			TREM2
PPP3CC			TRIB3
PPP3R1			TRIF
PRDX2			TRIM13
PRELID1			TRIM14
PRKCA			TRIM21
PRKCD			TRIM22
PRKDC			TRIM27
PRKN			TRIM34
PRKRA			TRIM38
PRODH			TRIM5
PSEN1			TRIM6
PSMD10			TRIM65
PSME3			TRIM68
PTEN			TRIM8
PTGIS			TRIML2
PTH			TRIML4
PTPMT1			TRPM7
PTPN1			TSC1
PTPN2			TSC2
PTPRC			TSPO
PTTG1IP			TYK2
PYCARD			UBA5
QARS1			UBQLN1
RACK1			UBQLN2
RAF1			UBQLN4
RB1			UCHL1
RB1CC1			UFC1
RBCK1			UFL1
RELA			UFM1
RET			ULK1
RFFL			USP10
RHOT1			USP13
RHOT2			USP21
RIPK1			USP30
RIPK3			USP33
RNF183			USP36
RNF186			UVRAG
RNF34			VDAC1
RNF41			VDAC2
RPL11			VDAC3
RPL26			VPS13C
RPS27L			VPS13D
RPS3			VPS24
RPS6KB1			VPS26A
RPS7			VPS26B
RRP8			VPS35
RTKN2			VPS4
RTL10			WAC
S100A8			WASHC1
S100A9			WDFY3
SCG2			WDR24
SCN2A			WDR41
SCRT2			WDR6
SELENOK			WDR81
SELENOS			WIPI2
SENP1			XIAP
SEPTIN4			ZBP1
SERINC3			ZC3H12A
SERPINE1			ZKSCAN3
SFN			ZMPSTE24
SFPQ
SFRP1
SFRP2
SGMS1
SGPL1
SGPP2
SH3RF1
SHH
SHISA5
SIAH1
SIAH2
SIRT1
SIVA1
SKIL
SLC25A5
SLC35F6
SLC9A3R1
SMAD3
SNAI1
SNAI2
SNW1
SOD1
SOD2
SORT1
SP100
SRC
SRPX
SST
SSTR3
ST20
STK11
STK24
STK25
STK3
STK4
STRADB
STX4
STYXL1
SYVN1
TAF9
TAF9B
TCF7L2
TERT
TFDP1
TFDP2
TFPT
TGFB1
TGFB2
TGFBR1
THBS1
TICAM1
TICAM2
TIMM50
TIMP3
TLR3
TLR4
TM2D1
TMBIM1
TMBIM6
TMC8
TMEM102
TMEM109
TMEM117
TMEM14A
TMEM161A
TNF
TNFAIP3
TNFRSF10A
TNFRSF10B
TNFRSF10C
TNFRSF12A
TNFRSF1A
TNFRSF1B
TNFRSF25
TNFSF10
TNFSF12
TOPORS
TP53
TP53BP2
TP63
TP73
TPD52L1
TPT1
TRADD
TRAF1
TRAF2
TRAF7
TRAP1
TRIAP1
TRIB3
TRIM32
TRIM39
TXNDC12
TYROBP
UACA
UBB
UBE2K
UBE4B
UBQLN1
UMOD
UNC5B
URI1
USP28
USP47
VDAC2
VNN1
WDR35
WNT4
WWOX
XBP1
YAP1
YBX3
YWHAB
YWHAE
YWHAG
YWHAH
YWHAQ
YWHAZ
ZC3HC1
ZDHHC3
ZMYND11
ZNF205
ZNF385A
ZNF385B
ZNF622
ZSWIM2
