# Supplementary material for: Construction of a novel five programmed cell death-related gene signature as a promising prognostic model for triple negative breast cancer
Source: PeerJ. 2025 Apr 28;13:e19359. doi: 10.7717/peerj.19359 (PMC12045267; doi:10.7717/peerj.19359)
Supplement: Supplemental Information 2 [file peerj-13-19359-s002.xls]

## Sheet: Sheet1
ITEM TO CHECK	IMPORTANCE	CHECKLIST
EXPERIMENTAL DESIGN
Definition of experimental and control groups	E	Page 5 line 28-30 and Page 6 line 1-10, table 1, supplementary XLS 1
Number within each group	E	Page 5 line 28-30 and Page 6 line 1-10, table 1, supplementary XLS 1
Assay carried out by core lab or investigator's lab?	D
Acknowledgement of authors' contributions	D
SAMPLE
Description	E	Page 5 line 28-30 and Page 6 line 1-10, table 1, supplementary XLS 1
Volume/mass of sample processed	D
Microdissection or macrodissection	E	Page 5 line 28-30 and Page 6 line 1-10, table 1, supplementary XLS 1
Processing procedure	E	Page 5 line 28-30 and Page 6 line 1-10, table 1, supplementary XLS 1
If frozen - how and how quickly?	E	Page 5 line 28-30 and Page 6 line 1-10, table 1, supplementary XLS 1
If fixed - with what, how quickly?	E	Page 5 line 28-30 and Page 6 line 1-10, table 1, supplementary XLS 1
Sample storage conditions and duration (especially for FFPE samples)	E	Page 5 line 28-30 and Page 6 line 1-10, table 1, supplementary XLS 1
NUCLEIC ACID EXTRACTION
Procedure and/or instrumentation	E	Page 5 line 28-30 and Page 6 line 1-10, table 1, supplementary XLS 1
Name of kit and details of any modifications	E	Page 5 line 28-30 and Page 6 line 1-10, table 1, supplementary XLS 1
Source of additional reagents used	D
Details of DNase or RNAse treatment	E	Page 5 line 28-30 and Page 6 line 1-10, table 1, supplementary XLS 1
Contamination assessment (DNA or RNA)	E	Page 5 line 28-30 and Page 6 line 1-10, table 1, supplementary XLS 1
Nucleic acid quantification	E	Page 5 line 28-30 and Page 6 line 1-10, table 1, supplementary XLS 1
Instrument and method	E	Page 5 line 28-30 and Page 6 line 1-10, table 1, supplementary XLS 1
Purity (A260/A280)	D
Yield	D
RNA integrity method/instrument	E	Page 5 line 28-30 and Page 6 line 1-10, table 1, supplementary XLS 1
RIN/RQI or Cq of 3' and 5' transcripts	E	Page 5 line 28-30 and Page 6 line 1-10, table 1, supplementary XLS 1
Electrophoresis traces	D
Inhibition testing (Cq dilutions, spike or other)	E	Page 5 line 28-30 and Page 6 line 1-10, table 1, supplementary XLS 1
REVERSE TRANSCRIPTION
Complete reaction conditions	E	Page 5 line 28-30 and Page 6 line 1-10, table 1, supplementary XLS 1
Amount of RNA and reaction volume	E	Page 5 line 28-30 and Page 6 line 1-10, table 1, supplementary XLS 1
Priming oligonucleotide (if using GSP) and concentration	E	Page 5 line 28-30 and Page 6 line 1-10, table 1, supplementary XLS 1
Reverse transcriptase and concentration	E	Page 5 line 28-30 and Page 6 line 1-10, table 1, supplementary XLS 1
Temperature and time	E	Page 5 line 28-30 and Page 6 line 1-10, table 1, supplementary XLS 1
Manufacturer of reagents and catalogue numbers	D
Cqs with and without RT	D*
Storage conditions of cDNA	D
qPCR TARGET INFORMATION
If multiplex, efficiency and LOD of each assay.	E	Page 5 line 28-30 and Page 6 line 1-10, table 1, supplementary XLS 1
Sequence accession number	E	Page 5 line 28-30 and Page 6 line 1-10, table 1, supplementary XLS 1
Location of amplicon	D
Amplicon length	E	Page 5 line 28-30 and Page 6 line 1-10, table 1, supplementary XLS 1
In silico specificity screen (BLAST, etc)	E	Page 5 line 28-30 and Page 6 line 1-10, table 1, supplementary XLS 1
Pseudogenes, retropseudogenes or other homologs?	D
Sequence alignment	D
Secondary structure analysis of amplicon	D
Location of each primer by exon or intron (if applicable)	E	Page 5 line 28-30 and Page 6 line 1-10, table 1, supplementary XLS 1
What splice variants are targeted?	E	Page 5 line 28-30 and Page 6 line 1-10, table 1, supplementary XLS 1
qPCR OLIGONUCLEOTIDES
Primer sequences	E	Page 5 line 28-30 and Page 6 line 1-10, table 1, supplementary XLS 1
RTPrimerDB Identification Number	D
Probe sequences	D**
Location and identity of any modifications	E	Page 5 line 28-30 and Page 6 line 1-10, table 1, supplementary XLS 1
Manufacturer of oligonucleotides	D
Purification method	D
qPCR PROTOCOL
Complete reaction conditions	E	Page 5 line 28-30 and Page 6 line 1-10, table 1, supplementary XLS 1
Reaction volume and amount of cDNA/DNA	E	Page 5 line 28-30 and Page 6 line 1-10, table 1, supplementary XLS 1
Primer, (probe), Mg++ and dNTP concentrations	E	Page 5 line 28-30 and Page 6 line 1-10, table 1, supplementary XLS 1
Polymerase identity and concentration	E	Page 5 line 28-30 and Page 6 line 1-10, table 1, supplementary XLS 1
Buffer/kit identity and manufacturer	E	Page 5 line 28-30 and Page 6 line 1-10, table 1, supplementary XLS 1
Exact chemical constitution of the buffer	D
Additives (SYBR Green I, DMSO, etc.)	E	Page 5 line 28-30 and Page 6 line 1-10, table 1, supplementary XLS 1
Manufacturer of plates/tubes and catalog number	D
Complete thermocycling parameters	E	Page 5 line 28-30 and Page 6 line 1-10, table 1, supplementary XLS 1
Reaction setup (manual/robotic)	D
Manufacturer of qPCR instrument	E	Page 5 line 28-30 and Page 6 line 1-10, table 1, supplementary XLS 1
qPCR VALIDATION
Evidence of optimisation (from gradients)	D
Specificity (gel, sequence, melt, or digest)	E	Page 5 line 28-30 and Page 6 line 1-10, table 1, supplementary XLS 1
For SYBR Green I, Cq of the NTC	E	Page 5 line 28-30 and Page 6 line 1-10, table 1, supplementary XLS 1
Standard curves with slope and y-intercept	E	Page 5 line 28-30 and Page 6 line 1-10, table 1, supplementary XLS 1
PCR efficiency calculated from slope	E	Page 5 line 28-30 and Page 6 line 1-10, table 1, supplementary XLS 1
Confidence interval for PCR efficiency or standard error	D
r2 of standard curve	E	Page 5 line 28-30 and Page 6 line 1-10, table 1, supplementary XLS 1
Linear dynamic range	E	Page 5 line 28-30 and Page 6 line 1-10, table 1, supplementary XLS 1
Cq variation at lower limit	E	Page 5 line 28-30 and Page 6 line 1-10, table 1, supplementary XLS 1
Confidence intervals throughout range	D
Evidence for limit of detection	E	Page 5 line 28-30 and Page 6 line 1-10, table 1, supplementary XLS 1
If multiplex, efficiency and LOD of each assay.	E	Page 5 line 28-30 and Page 6 line 1-10, table 1, supplementary XLS 1
DATA ANALYSIS
qPCR analysis program (source, version)	E	Page 5 line 28-30 and Page 6 line 1-10, table 1, supplementary XLS 1
Cq method determination	E	Page 5 line 28-30 and Page 6 line 1-10, table 1, supplementary XLS 1
Outlier identification and disposition	E	Page 5 line 28-30 and Page 6 line 1-10, table 1, supplementary XLS 1
Results of NTCs	E	Page 5 line 28-30 and Page 6 line 1-10, table 1, supplementary XLS 1
Justification of number and choice of reference genes	E	Page 5 line 28-30 and Page 6 line 1-10, table 1, supplementary XLS 1
Description of normalisation method	E	Page 5 line 28-30 and Page 6 line 1-10, table 1, supplementary XLS 1
Number and concordance of biological replicates	D
Number and stage (RT or qPCR) of technical replicates	E	Page 5 line 28-30 and Page 6 line 1-10, table 1, supplementary XLS 1
Repeatability (intra-assay variation)	E
Reproducibility (inter-assay variation, %CV)	D
Power analysis	D
Statistical methods for result significance	E	Page 5 line 28-30 and Page 6 line 1-10, table 1, supplementary XLS 1
Software (source, version)	E	Page 5 line 28-30 and Page 6 line 1-10, table 1, supplementary XLS 1
Cq or raw data submission using RDML	D
Table 1. MIQE checklist for authors, reviewers and editors. All essential information (E) must be submitted with the manuscript. Desirable
information (D) should be submitted if available. If using primers obtained from RTPrimerDB, information on qPCR target, oligonucleotides,
protocols and validation is available from that source.
*: Assessing the absence of DNA using a no RT assay is essential when first extracting RNA. Once the sample has been validated as
RDNA-free, inclusion of a no-RT control is desirable, but no longer essential.
**: Disclosure of the probe sequence is highly desirable and strongly encouraged. However, since not all commercial pre-designed assay
vendors provide this information, it cannot be an essential requirement. Use of such assays is advised against.
