# Supplementary material for: Construction of a novel five programmed cell death-related gene signature as a promising prognostic model for triple negative breast cancer
Source: PeerJ. 2025 Apr 28;13:e19359. doi: 10.7717/peerj.19359 (PMC12045267; doi:10.7717/peerj.19359)
Supplement: Supplemental Information 3 [file peerj-13-19359-s003.xls]

## Sheet: Sample Setup
Block Type	96-Well 0.2-mL Block
Calibration Background is expired	Yes
Calibration Background performed on	06-16-2022
Calibration Pure Dye ABY is expired	Yes
Calibration Pure Dye ABY performed on	06-16-2022
Calibration Pure Dye CY5 is expired	Yes
Calibration Pure Dye CY5 performed on	06-16-2022
Calibration Pure Dye FAM is expired	Yes
Calibration Pure Dye FAM performed on	06-16-2022
Calibration Pure Dye JUN is expired	Yes
Calibration Pure Dye JUN performed on	06-16-2022
Calibration Pure Dye MUSTANG PURPLE is expired	Yes
Calibration Pure Dye MUSTANG PURPLE performed on	06-16-2022
Calibration Pure Dye NED is expired	Yes
Calibration Pure Dye NED performed on	06-16-2022
Calibration Pure Dye ROX is expired	Yes
Calibration Pure Dye ROX performed on	06-16-2022
Calibration Pure Dye SYBR is expired	Yes
Calibration Pure Dye SYBR performed on	06-16-2022
Calibration Pure Dye TAMRA is expired	Yes
Calibration Pure Dye TAMRA performed on	06-16-2022
Calibration Pure Dye VIC is expired	Yes
Calibration Pure Dye VIC performed on	06-16-2022
Calibration ROI is expired	Yes
Calibration ROI performed on	06-16-2022
Calibration Uniformity is expired	Yes
Calibration Uniformity performed on	06-16-2022
Chemistry	SYBR_GREEN
Date Created	2024-09-07 20:45:28 PM CST
Experiment Barcode
Experiment Comment
Experiment File Name	D:\SQF\2024-09-07_SQF_qPCR_.eds
Experiment Name	2024-09-07_SQF_qPCR_
Experiment Run End Time	2024-09-07 20:42:23 PM CST
Experiment Type	Standard Curve
Instrument Name	2765222065148
Instrument Serial Number	2765222065148
Instrument Type	QuantStudio™ 5 System
Passive Reference	ROX
Post-read Stage/Step
Pre-read Stage/Step
Quantification Cycle Method	Ct
Signal Smoothing On	true
Stage where Melt Analysis is performed	Stage3
Stage/ Cycle where Ct Analysis is performed	Stage2, Step2
User Name
Well	Well Position	Sample Name	Sample Color	Biogroup Name	Biogroup Color	Target Name	Target Color	Task	Reporter	Quencher	Quantity	Comments
1	A1	10A	RGB(176,23,31)			GAPD	RGB(238,238,0)	UNKNOWN	SYBR	None
2	A2	10A	RGB(176,23,31)			GAPD	RGB(238,238,0)	UNKNOWN	SYBR	None
3	A3	10A	RGB(176,23,31)			GAPD	RGB(238,238,0)	UNKNOWN	SYBR	None
4	A4	10A	RGB(176,23,31)			GAPD	RGB(238,238,0)	UNKNOWN	SYBR	None
5	A5	231	RGB(0,0,255)			GAPD	RGB(238,238,0)	UNKNOWN	SYBR	None
6	A6	231	RGB(0,0,255)			GAPD	RGB(238,238,0)	UNKNOWN	SYBR	None
7	A7	231	RGB(0,0,255)			GAPD	RGB(238,238,0)	UNKNOWN	SYBR	None
8	A8	231	RGB(0,0,255)			GAPD	RGB(238,238,0)	UNKNOWN	SYBR	None
9	A9	10A	RGB(176,23,31)			GAPD	RGB(238,238,0)	UNKNOWN	SYBR	None
10	A10
11	A11
12	A12
13	B1	10A	RGB(176,23,31)			SCARB1	RGB(142,56,142)	UNKNOWN	SYBR	None
14	B2	10A	RGB(176,23,31)			SCARB1	RGB(142,56,142)	UNKNOWN	SYBR	None
15	B3	10A	RGB(176,23,31)			SCARB1	RGB(142,56,142)	UNKNOWN	SYBR	None
16	B4	10A	RGB(176,23,31)			SCARB1	RGB(142,56,142)	UNKNOWN	SYBR	None
17	B5	231	RGB(0,0,255)			SCARB1	RGB(142,56,142)	UNKNOWN	SYBR	None
18	B6	231	RGB(0,0,255)			SCARB1	RGB(142,56,142)	UNKNOWN	SYBR	None
19	B7	231	RGB(0,0,255)			SCARB1	RGB(142,56,142)	UNKNOWN	SYBR	None
20	B8	231	RGB(0,0,255)			SCARB1	RGB(142,56,142)	UNKNOWN	SYBR	None
21	B9	10A	RGB(176,23,31)			GAPD	RGB(238,238,0)	UNKNOWN	SYBR	None
22	B10
23	B11
24	B12
25	C1	10A	RGB(176,23,31)			SEPTIN3	RGB(198,113,113)	UNKNOWN	SYBR	None
26	C2	10A	RGB(176,23,31)			SEPTIN3	RGB(198,113,113)	UNKNOWN	SYBR	None
27	C3	10A	RGB(176,23,31)			SEPTIN3	RGB(198,113,113)	UNKNOWN	SYBR	None
28	C4	10A	RGB(176,23,31)			SEPTIN3	RGB(198,113,113)	UNKNOWN	SYBR	None
29	C5	231	RGB(0,0,255)			SEPTIN3	RGB(198,113,113)	UNKNOWN	SYBR	None
30	C6	231	RGB(0,0,255)			SEPTIN3	RGB(198,113,113)	UNKNOWN	SYBR	None
31	C7	231	RGB(0,0,255)			SEPTIN3	RGB(198,113,113)	UNKNOWN	SYBR	None
32	C8	231	RGB(0,0,255)			SEPTIN3	RGB(198,113,113)	UNKNOWN	SYBR	None
33	C9	10A	RGB(176,23,31)			GAPD	RGB(238,238,0)	UNKNOWN	SYBR	None
34	C10
35	C11
36	C12
37	D1	10A	RGB(176,23,31)			CHML	RGB(0,245,255)	UNKNOWN	SYBR	None
38	D2	10A	RGB(176,23,31)			CHML	RGB(0,245,255)	UNKNOWN	SYBR	None
39	D3	10A	RGB(176,23,31)			CHML	RGB(0,245,255)	UNKNOWN	SYBR	None
40	D4	10A	RGB(176,23,31)			CHML	RGB(0,245,255)	UNKNOWN	SYBR	None
41	D5	231	RGB(0,0,255)			CHML	RGB(0,245,255)	UNKNOWN	SYBR	None
42	D6	231	RGB(0,0,255)			CHML	RGB(0,245,255)	UNKNOWN	SYBR	None
43	D7	231	RGB(0,0,255)			CHML	RGB(0,245,255)	UNKNOWN	SYBR	None
44	D8	231	RGB(0,0,255)			CHML	RGB(0,245,255)	UNKNOWN	SYBR	None
45	D9	10A	RGB(176,23,31)			GAPD	RGB(238,238,0)	UNKNOWN	SYBR	None
46	D10
47	D11
48	D12
49	E1	10A	RGB(176,23,31)			COL5A3	RGB(238,220,130)	UNKNOWN	SYBR	None
50	E2	10A	RGB(176,23,31)			COL5A3	RGB(238,220,130)	UNKNOWN	SYBR	None
51	E3	10A	RGB(176,23,31)			COL5A3	RGB(238,220,130)	UNKNOWN	SYBR	None
52	E4	10A	RGB(176,23,31)			COL5A3	RGB(238,220,130)	UNKNOWN	SYBR	None
53	E5	231	RGB(0,0,255)			COL5A3	RGB(238,220,130)	UNKNOWN	SYBR	None
54	E6	231	RGB(0,0,255)			COL5A3	RGB(238,220,130)	UNKNOWN	SYBR	None
55	E7	231	RGB(0,0,255)			COL5A3	RGB(238,220,130)	UNKNOWN	SYBR	None
56	E8	231	RGB(0,0,255)			COL5A3	RGB(238,220,130)	UNKNOWN	SYBR	None
57	E9	231	RGB(0,0,255)			GAPD	RGB(238,238,0)	UNKNOWN	SYBR	None
58	E10
59	E11
60	E12
61	F1	10A	RGB(176,23,31)			SYNM	RGB(255,127,0)	UNKNOWN	SYBR	None
62	F2	10A	RGB(176,23,31)			SYNM	RGB(255,127,0)	UNKNOWN	SYBR	None
63	F3	10A	RGB(176,23,31)			SYNM	RGB(255,127,0)	UNKNOWN	SYBR	None
64	F4	10A	RGB(176,23,31)			SYNM	RGB(255,127,0)	UNKNOWN	SYBR	None
65	F5	231	RGB(0,0,255)			SYNM	RGB(255,127,0)	UNKNOWN	SYBR	None
66	F6	231	RGB(0,0,255)			SYNM	RGB(255,127,0)	UNKNOWN	SYBR	None
67	F7	231	RGB(0,0,255)			SYNM	RGB(255,127,0)	UNKNOWN	SYBR	None
68	F8	231	RGB(0,0,255)			SYNM	RGB(255,127,0)	UNKNOWN	SYBR	None
69	F9	231	RGB(0,0,255)			GAPD	RGB(238,238,0)	UNKNOWN	SYBR	None
70	F10
71	F11
72	F12
73	G1	10A	RGB(176,23,31)			STAB1	RGB(142,142,56)	UNKNOWN	SYBR	None
74	G2	10A	RGB(176,23,31)			STAB1	RGB(142,142,56)	UNKNOWN	SYBR	None
75	G3	10A	RGB(176,23,31)			STAB1	RGB(142,142,56)	UNKNOWN	SYBR	None
76	G4	10A	RGB(176,23,31)			STAB1	RGB(142,142,56)	UNKNOWN	SYBR	None
77	G5	231	RGB(0,0,255)			STAB1	RGB(142,142,56)	UNKNOWN	SYBR	None
78	G6	231	RGB(0,0,255)			STAB1	RGB(142,142,56)	UNKNOWN	SYBR	None
79	G7	231	RGB(0,0,255)			STAB1	RGB(142,142,56)	UNKNOWN	SYBR	None
80	G8	231	RGB(0,0,255)			STAB1	RGB(142,142,56)	UNKNOWN	SYBR	None
81	G9	231	RGB(0,0,255)			GAPD	RGB(238,238,0)	UNKNOWN	SYBR	None
82	G10
83	G11
84	G12
85	H1	10A	RGB(176,23,31)			PINK1	RGB(238,44,44)	UNKNOWN	SYBR	None
86	H2	10A	RGB(176,23,31)			PINK1	RGB(238,44,44)	UNKNOWN	SYBR	None
87	H3	10A	RGB(176,23,31)			PINK1	RGB(238,44,44)	UNKNOWN	SYBR	None
88	H4	10A	RGB(176,23,31)			PINK1	RGB(238,44,44)	UNKNOWN	SYBR	None
89	H5	231	RGB(0,0,255)			PINK1	RGB(238,44,44)	UNKNOWN	SYBR	None
90	H6	231	RGB(0,0,255)			PINK1	RGB(238,44,44)	UNKNOWN	SYBR	None
91	H7	231	RGB(0,0,255)			PINK1	RGB(238,44,44)	UNKNOWN	SYBR	None
92	H8	231	RGB(0,0,255)			PINK1	RGB(238,44,44)	UNKNOWN	SYBR	None
93	H9	231	RGB(0,0,255)			GAPD	RGB(238,238,0)	UNKNOWN	SYBR	None
94	H10
95	H11
96	H12

## Sheet: Amplification Data
Block Type	96-Well 0.2-mL Block
Calibration Background is expired	Yes
Calibration Background performed on	06-16-2022
Calibration Pure Dye ABY is expired	Yes
Calibration Pure Dye ABY performed on	06-16-2022
Calibration Pure Dye CY5 is expired	Yes
Calibration Pure Dye CY5 performed on	06-16-2022
Calibration Pure Dye FAM is expired	Yes
Calibration Pure Dye FAM performed on	06-16-2022
Calibration Pure Dye JUN is expired	Yes
Calibration Pure Dye JUN performed on	06-16-2022
Calibration Pure Dye MUSTANG PURPLE is expired	Yes
Calibration Pure Dye MUSTANG PURPLE performed on	06-16-2022
Calibration Pure Dye NED is expired	Yes
Calibration Pure Dye NED performed on	06-16-2022
Calibration Pure Dye ROX is expired	Yes
Calibration Pure Dye ROX performed on	06-16-2022
Calibration Pure Dye SYBR is expired	Yes
Calibration Pure Dye SYBR performed on	06-16-2022
Calibration Pure Dye TAMRA is expired	Yes
Calibration Pure Dye TAMRA performed on	06-16-2022
Calibration Pure Dye VIC is expired	Yes
Calibration Pure Dye VIC performed on	06-16-2022
Calibration ROI is expired	Yes
Calibration ROI performed on	06-16-2022
Calibration Uniformity is expired	Yes
Calibration Uniformity performed on	06-16-2022
Chemistry	SYBR_GREEN
Date Created	2024-09-07 20:45:28 PM CST
Experiment Barcode
Experiment Comment
Experiment File Name	D:\SQF\2024-09-07_SQF_qPCR_.eds
Experiment Name	2024-09-07_SQF_qPCR_
Experiment Run End Time	2024-09-07 20:42:23 PM CST
Experiment Type	Standard Curve
Instrument Name	2765222065148
Instrument Serial Number	2765222065148
Instrument Type	QuantStudio™ 5 System
Passive Reference	ROX
Post-read Stage/Step
Pre-read Stage/Step
Quantification Cycle Method	Ct
Signal Smoothing On	true
Stage where Melt Analysis is performed	Stage3
Stage/ Cycle where Ct Analysis is performed	Stage2, Step2
User Name
Well	Well Position	Cycle	Target Name	Rn	Delta Rn
1	A1	1	GAPD	0.405387	0.00209582
1	A1	2	GAPD	0.405	0.000947685
1	A1	3	GAPD	0.40379	-0.00102377
1	A1	4	GAPD	0.404581	-0.000993818
1	A1	5	GAPD	0.408308	0.00197229
1	A1	6	GAPD	0.407345	0.00024867
1	A1	7	GAPD	0.405294	-0.00256419
1	A1	8	GAPD	0.408651	3.26019e-05
1	A1	9	GAPD	0.412169	0.00278955
1	A1	10	GAPD	0.412334	0.00219288
1	A1	11	GAPD	0.411849	0.000947115
1	A1	12	GAPD	0.410552	-0.00111109
1	A1	13	GAPD	0.410172	-0.00225228
1	A1	14	GAPD	0.411075	-0.00211069
1	A1	15	GAPD	0.415819	0.00187274
1	A1	16	GAPD	0.420943	0.00623539
1	A1	17	GAPD	0.429862	0.0143933
1	A1	18	GAPD	0.452185	0.0359549
1	A1	19	GAPD	0.489302	0.0723111
1	A1	20	GAPD	0.543095	0.125343
1	A1	21	GAPD	0.61861	0.200097
1	A1	22	GAPD	0.697264	0.27799
1	A1	23	GAPD	0.761652	0.341617
1	A1	24	GAPD	0.814774	0.393978
1	A1	25	GAPD	0.863747	0.442189
1	A1	26	GAPD	0.901269	0.478951
1	A1	27	GAPD	0.927574	0.504494
1	A1	28	GAPD	0.94049	0.51665
1	A1	29	GAPD	0.95322	0.528619
1	A1	30	GAPD	0.962348	0.536985
1	A1	31	GAPD	0.968729	0.542605
1	A1	32	GAPD	0.973433	0.546548
1	A1	33	GAPD	0.978924	0.551278
1	A1	34	GAPD	0.982258	0.553851
1	A1	35	GAPD	0.990848	0.56168
1	A1	36	GAPD	0.990513	0.560583
1	A1	37	GAPD	0.988268	0.557577
1	A1	38	GAPD	0.989849	0.558398
1	A1	39	GAPD	0.98842	0.556208
1	A1	40	GAPD	0.986662	0.553689
2	A2	1	GAPD	0.236055	0.00427226
2	A2	2	GAPD	0.236941	0.00448731
2	A2	3	GAPD	0.236488	0.00336295
2	A2	4	GAPD	0.234331	0.00053468
2	A2	5	GAPD	0.2321	-0.00236823
2	A2	6	GAPD	0.232328	-0.00281164
2	A2	7	GAPD	0.235353	-0.000457923
2	A2	8	GAPD	0.23741	0.000927619
2	A2	9	GAPD	0.23868	0.00152665
2	A2	10	GAPD	0.238053	0.000228074
2	A2	11	GAPD	0.2373	-0.00119586
2	A2	12	GAPD	0.237659	-0.00150896
2	A2	13	GAPD	0.238997	-0.000842269
2	A2	14	GAPD	0.241125	0.000614843
2	A2	15	GAPD	0.243172	0.00199007
2	A2	16	GAPD	0.252076	0.0102223
2	A2	17	GAPD	0.264002	0.0214774
2	A2	18	GAPD	0.289913	0.0467168
2	A2	19	GAPD	0.333772	0.0899047
2	A2	20	GAPD	0.398718	0.15418
2	A2	21	GAPD	0.480754	0.235544
2	A2	22	GAPD	0.558198	0.312316
2	A2	23	GAPD	0.624945	0.378392
2	A2	24	GAPD	0.67943	0.432206
2	A2	25	GAPD	0.719137	0.471241
2	A2	26	GAPD	0.754374	0.505806
2	A2	27	GAPD	0.779025	0.529786
2	A2	28	GAPD	0.796821	0.546911
2	A2	29	GAPD	0.809269	0.558687
2	A2	30	GAPD	0.818821	0.567568
2	A2	31	GAPD	0.827402	0.575478
2	A2	32	GAPD	0.83155	0.578955
2	A2	33	GAPD	0.839778	0.586511
2	A2	34	GAPD	0.844788	0.590849
2	A2	35	GAPD	0.845532	0.590922
2	A2	36	GAPD	0.845176	0.589895
2	A2	37	GAPD	0.847571	0.591618
2	A2	38	GAPD	0.846667	0.590043
2	A2	39	GAPD	0.847207	0.589912
2	A2	40	GAPD	0.851607	0.59364
3	A3	1	GAPD	0.334877	0.00363493
3	A3	2	GAPD	0.334412	0.0019255
3	A3	3	GAPD	0.334563	0.000832028
3	A3	4	GAPD	0.335808	0.000832597
3	A3	5	GAPD	0.337054	0.000834001
3	A3	6	GAPD	0.338099	0.000634597
3	A3	7	GAPD	0.337406	-0.00130237
3	A3	8	GAPD	0.338225	-0.00172824
3	A3	9	GAPD	0.342568	0.00137078
3	A3	10	GAPD	0.342924	0.00048223
3	A3	11	GAPD	0.341213	-0.00247297
3	A3	12	GAPD	0.341461	-0.00346991
3	A3	13	GAPD	0.345095	-0.00108056
3	A3	14	GAPD	0.348569	0.00114928
3	A3	15	GAPD	0.352583	0.00391854
3	A3	16	GAPD	0.359025	0.00911616
3	A3	17	GAPD	0.375139	0.0239856
3	A3	18	GAPD	0.402577	0.0501792
3	A3	19	GAPD	0.444542	0.0908999
3	A3	20	GAPD	0.509886	0.155
3	A3	21	GAPD	0.583743	0.227612
3	A3	22	GAPD	0.657891	0.300515
3	A3	23	GAPD	0.722726	0.364106
3	A3	24	GAPD	0.774267	0.414403
3	A3	25	GAPD	0.816853	0.455744
3	A3	26	GAPD	0.851042	0.488689
3	A3	27	GAPD	0.873803	0.510205
3	A3	28	GAPD	0.888454	0.523611
3	A3	29	GAPD	0.904533	0.538446
3	A3	30	GAPD	0.912925	0.545594
3	A3	31	GAPD	0.921785	0.553209
3	A3	32	GAPD	0.927888	0.558068
3	A3	33	GAPD	0.933658	0.562594
3	A3	34	GAPD	0.940837	0.568528
3	A3	35	GAPD	0.941828	0.568275
3	A3	36	GAPD	0.942717	0.56792
3	A3	37	GAPD	0.944497	0.568455
3	A3	38	GAPD	0.94522	0.567934
3	A3	39	GAPD	0.945512	0.566981
3	A3	40	GAPD	0.946694	0.566918
4	A4	1	GAPD	0.419033	0.00455001
4	A4	2	GAPD	0.416577	0.00159785
4	A4	3	GAPD	0.415324	-0.000150852
4	A4	4	GAPD	0.415667	-0.000304448
4	A4	5	GAPD	0.41774	0.00127291
4	A4	6	GAPD	0.417931	0.000968123
4	A4	7	GAPD	0.41829	0.000830978
4	A4	8	GAPD	0.418941	0.000986105
4	A4	9	GAPD	0.418887	0.000436377
4	A4	10	GAPD	0.417821	-0.00112529
4	A4	11	GAPD	0.415427	-0.00401587
4	A4	12	GAPD	0.41613	-0.00380868
4	A4	13	GAPD	0.420052	-0.00038227
4	A4	14	GAPD	0.422359	0.00142867
4	A4	15	GAPD	0.42529	0.00386424
4	A4	16	GAPD	0.430039	0.0081171
4	A4	17	GAPD	0.440928	0.0185097
4	A4	18	GAPD	0.463884	0.0409707
4	A4	19	GAPD	0.496516	0.0731063
4	A4	20	GAPD	0.550463	0.126558
4	A4	21	GAPD	0.625627	0.201225
4	A4	22	GAPD	0.69885	0.273952
4	A4	23	GAPD	0.765717	0.340324
4	A4	24	GAPD	0.822728	0.396839
4	A4	25	GAPD	0.866317	0.439932
4	A4	26	GAPD	0.901874	0.474993
4	A4	27	GAPD	0.926826	0.499449
4	A4	28	GAPD	0.943862	0.515989
4	A4	29	GAPD	0.960932	0.532564
4	A4	30	GAPD	0.970714	0.541849
4	A4	31	GAPD	0.977472	0.548111
4	A4	32	GAPD	0.98409	0.554234
4	A4	33	GAPD	0.990938	0.560586
4	A4	34	GAPD	0.992858	0.56201
4	A4	35	GAPD	0.996839	0.565495
4	A4	36	GAPD	0.997746	0.565906
4	A4	37	GAPD	0.998583	0.566247
4	A4	38	GAPD	0.998837	0.566005
4	A4	39	GAPD	0.999064	0.565736
4	A4	40	GAPD	1.00002	0.566198
5	A5	1	GAPD	0.195969	0.00173185
5	A5	2	GAPD	0.196939	0.00281219
5	A5	3	GAPD	0.196197	0.00218073
5	A5	4	GAPD	0.194844	0.000937689
5	A5	5	GAPD	0.192713	-0.00108231
5	A5	6	GAPD	0.192236	-0.00144965
5	A5	7	GAPD	0.192762	-0.000812427
5	A5	8	GAPD	0.193096	-0.000368547
5	A5	9	GAPD	0.194016	0.000662006
5	A5	10	GAPD	0.193529	0.000285398
5	A5	11	GAPD	0.191566	-0.00156726
5	A5	12	GAPD	0.19171	-0.00131252
5	A5	13	GAPD	0.193289	0.000376738
5	A5	14	GAPD	0.193322	0.000520001
5	A5	15	GAPD	0.194322	0.00163016
5	A5	16	GAPD	0.200514	0.0079328
5	A5	17	GAPD	0.206988	0.0145177
5	A5	18	GAPD	0.221645	0.0292847
5	A5	19	GAPD	0.248316	0.0560664
5	A5	20	GAPD	0.296065	0.103926
5	A5	21	GAPD	0.364882	0.172852
5	A5	22	GAPD	0.442929	0.25101
5	A5	23	GAPD	0.523343	0.331535
5	A5	24	GAPD	0.591397	0.399699
5	A5	25	GAPD	0.645604	0.454017
5	A5	26	GAPD	0.692194	0.500717
5	A5	27	GAPD	0.723249	0.531883
5	A5	28	GAPD	0.745522	0.554266
5	A5	29	GAPD	0.767551	0.576405
5	A5	30	GAPD	0.782914	0.591878
5	A5	31	GAPD	0.793786	0.602861
5	A5	32	GAPD	0.800666	0.609851
5	A5	33	GAPD	0.807472	0.616768
5	A5	34	GAPD	0.812025	0.621431
5	A5	35	GAPD	0.815326	0.624842
5	A5	36	GAPD	0.81918	0.628807
5	A5	37	GAPD	0.818985	0.628723
5	A5	38	GAPD	0.81893	0.628778
5	A5	39	GAPD	0.817658	0.627616
5	A5	40	GAPD	0.820555	0.630624
6	A6	1	GAPD	0.294568	0.000820525
6	A6	2	GAPD	0.294368	0.000319685
6	A6	3	GAPD	0.295555	0.00120626
6	A6	4	GAPD	0.296352	0.00170288
6	A6	5	GAPD	0.296051	0.00110133
6	A6	6	GAPD	0.294565	-0.000684286
6	A6	7	GAPD	0.294731	-0.000818796
6	A6	8	GAPD	0.296068	0.000217597
6	A6	9	GAPD	0.293165	-0.0029864
6	A6	10	GAPD	0.29341	-0.00304164
6	A6	11	GAPD	0.296729	-2.28856e-05
6	A6	12	GAPD	0.297277	0.000225355
6	A6	13	GAPD	0.29705	-0.000302307
6	A6	14	GAPD	0.297765	0.00011238
6	A6	15	GAPD	0.301244	0.00329052
6	A6	16	GAPD	0.303077	0.00482333
6	A6	17	GAPD	0.312052	0.0134977
6	A6	18	GAPD	0.327165	0.0283107
6	A6	19	GAPD	0.350523	0.0513684
6	A6	20	GAPD	0.393303	0.0938481
6	A6	21	GAPD	0.456311	0.156555
6	A6	22	GAPD	0.53632	0.236264
6	A6	23	GAPD	0.617653	0.317297
6	A6	24	GAPD	0.686596	0.38594
6	A6	25	GAPD	0.745783	0.444826
6	A6	26	GAPD	0.793025	0.491768
6	A6	27	GAPD	0.830429	0.528871
6	A6	28	GAPD	0.858999	0.557141
6	A6	29	GAPD	0.877945	0.575787
6	A6	30	GAPD	0.894933	0.592474
6	A6	31	GAPD	0.905642	0.602882
6	A6	32	GAPD	0.912508	0.609449
6	A6	33	GAPD	0.921054	0.617694
6	A6	34	GAPD	0.926834	0.623173
6	A6	35	GAPD	0.930008	0.626047
6	A6	36	GAPD	0.934733	0.630471
6	A6	37	GAPD	0.936457	0.631895
6	A6	38	GAPD	0.938053	0.633191
6	A6	39	GAPD	0.939615	0.634452
6	A6	40	GAPD	0.943916	0.638453
7	A7	1	GAPD	0.30704	0.00154248
7	A7	2	GAPD	0.30841	0.00278987
7	A7	3	GAPD	0.307911	0.00216735
7	A7	4	GAPD	0.306006	0.000138672
7	A7	5	GAPD	0.305526	-0.000465548
7	A7	6	GAPD	0.305048	-0.00106694
7	A7	7	GAPD	0.30517	-0.0010685
7	A7	8	GAPD	0.306037	-0.000324757
7	A7	9	GAPD	0.307277	0.00079166
7	A7	10	GAPD	0.307357	0.000748945
7	A7	11	GAPD	0.306358	-0.000373747
7	A7	12	GAPD	0.305162	-0.00169361
7	A7	13	GAPD	0.304787	-0.00219239
7	A7	14	GAPD	0.307114	1.14536e-05
7	A7	15	GAPD	0.310553	0.0033274
7	A7	16	GAPD	0.31341	0.00606095
7	A7	17	GAPD	0.320408	0.0129354
7	A7	18	GAPD	0.333682	0.0260857
7	A7	19	GAPD	0.355856	0.0481364
7	A7	20	GAPD	0.397716	0.089873
7	A7	21	GAPD	0.463732	0.155765
7	A7	22	GAPD	0.542696	0.234606
7	A7	23	GAPD	0.625457	0.317244
7	A7	24	GAPD	0.692788	0.384451
7	A7	25	GAPD	0.750574	0.442113
7	A7	26	GAPD	0.800303	0.491719
7	A7	27	GAPD	0.836019	0.527312
7	A7	28	GAPD	0.860465	0.551633
7	A7	29	GAPD	0.880527	0.571572
7	A7	30	GAPD	0.897939	0.588861
7	A7	31	GAPD	0.907873	0.598671
7	A7	32	GAPD	0.916934	0.607609
7	A7	33	GAPD	0.927475	0.618026
7	A7	34	GAPD	0.931771	0.622199
7	A7	35	GAPD	0.936389	0.626694
7	A7	36	GAPD	0.93791	0.628092
7	A7	37	GAPD	0.938232	0.628289
7	A7	38	GAPD	0.937537	0.627471
7	A7	39	GAPD	0.939215	0.629026
7	A7	40	GAPD	0.940641	0.630328
8	A8	1	GAPD	0.292811	-0.00212665
8	A8	2	GAPD	0.292504	-0.00292532
8	A8	3	GAPD	0.294936	-0.000984406
8	A8	4	GAPD	0.298371	0.0019584
8	A8	5	GAPD	0.298657	0.00175339
8	A8	6	GAPD	0.297954	0.000558739
8	A8	7	GAPD	0.296388	-0.00149953
8	A8	8	GAPD	0.296615	-0.00176396
8	A8	9	GAPD	0.29927	0.000399128
8	A8	10	GAPD	0.299523	0.000161339
8	A8	11	GAPD	0.298925	-0.000928529
8	A8	12	GAPD	0.298974	-0.00137091
8	A8	13	GAPD	0.300428	-0.000408352
8	A8	14	GAPD	0.300665	-0.000663605
8	A8	15	GAPD	0.302766	0.000945843
8	A8	16	GAPD	0.304154	0.00184245
8	A8	17	GAPD	0.308764	0.00596122
8	A8	18	GAPD	0.32071	0.0174154
8	A8	19	GAPD	0.337654	0.0338676
8	A8	20	GAPD	0.369365	0.0650867
8	A8	21	GAPD	0.42065	0.115881
8	A8	22	GAPD	0.491285	0.186024
8	A8	23	GAPD	0.5744	0.268648
8	A8	24	GAPD	0.651547	0.345303
8	A8	25	GAPD	0.715902	0.409166
8	A8	26	GAPD	0.770825	0.463597
8	A8	27	GAPD	0.812549	0.50483
8	A8	28	GAPD	0.843035	0.534825
8	A8	29	GAPD	0.866126	0.557424
8	A8	30	GAPD	0.883708	0.574514
8	A8	31	GAPD	0.89572	0.586035
8	A8	32	GAPD	0.904766	0.594589
8	A8	33	GAPD	0.914474	0.603806
8	A8	34	GAPD	0.921279	0.610119
8	A8	35	GAPD	0.923956	0.612305
8	A8	36	GAPD	0.926392	0.614249
8	A8	37	GAPD	0.929174	0.616539
8	A8	38	GAPD	0.928489	0.615362
8	A8	39	GAPD	0.927356	0.613738
8	A8	40	GAPD	0.926928	0.612818
9	A9	1	GAPD	0.271803	0.000292041
9	A9	2	GAPD	0.272032	0.000202433
9	A9	3	GAPD	0.273971	0.00182312
9	A9	4	GAPD	0.273699	0.0012323
9	A9	5	GAPD	0.273276	0.000490525
9	A9	6	GAPD	0.272368	-0.000735177
9	A9	7	GAPD	0.272265	-0.00115696
9	A9	8	GAPD	0.273494	-0.000246404
9	A9	9	GAPD	0.273701	-0.000358721
9	A9	10	GAPD	0.273436	-0.000942303
9	A9	11	GAPD	0.272288	-0.00240827
9	A9	12	GAPD	0.272448	-0.00256711
9	A9	13	GAPD	0.275324	-9.43784e-06
9	A9	14	GAPD	0.277129	0.00147628
9	A9	15	GAPD	0.279373	0.00340217
9	A9	16	GAPD	0.283102	0.00681272
9	A9	17	GAPD	0.292767	0.0161591
9	A9	18	GAPD	0.313313	0.0363856
9	A9	19	GAPD	0.345633	0.0683874
9	A9	20	GAPD	0.400525	0.122961
9	A9	21	GAPD	0.479307	0.201424
9	A9	22	GAPD	0.56394	0.285739
9	A9	23	GAPD	0.637128	0.358608
9	A9	24	GAPD	0.700727	0.421888
9	A9	25	GAPD	0.753323	0.474166
9	A9	26	GAPD	0.792925	0.513449
9	A9	27	GAPD	0.822845	0.54305
9	A9	28	GAPD	0.843031	0.562918
9	A9	29	GAPD	0.860406	0.579975
9	A9	30	GAPD	0.872285	0.591534
9	A9	31	GAPD	0.879472	0.598404
9	A9	32	GAPD	0.887043	0.605655
9	A9	33	GAPD	0.896856	0.61515
9	A9	34	GAPD	0.901544	0.61952
9	A9	35	GAPD	0.900846	0.618503
9	A9	36	GAPD	0.901705	0.619043
9	A9	37	GAPD	0.904283	0.621303
9	A9	38	GAPD	0.905355	0.622055
9	A9	39	GAPD	0.906901	0.623283
9	A9	40	GAPD	0.90688	0.622944
10	A10	1
10	A10	2
10	A10	3
10	A10	4
10	A10	5
10	A10	6
10	A10	7
10	A10	8
10	A10	9
10	A10	10
10	A10	11
10	A10	12
10	A10	13
10	A10	14
10	A10	15
10	A10	16
10	A10	17
10	A10	18
10	A10	19
10	A10	20
10	A10	21
10	A10	22
10	A10	23
10	A10	24
10	A10	25
10	A10	26
10	A10	27
10	A10	28
10	A10	29
10	A10	30
10	A10	31
10	A10	32
10	A10	33
10	A10	34
10	A10	35
10	A10	36
10	A10	37
10	A10	38
10	A10	39
10	A10	40
11	A11	1
11	A11	2
11	A11	3
11	A11	4
11	A11	5
11	A11	6
11	A11	7
11	A11	8
11	A11	9
11	A11	10
11	A11	11
11	A11	12
11	A11	13
11	A11	14
11	A11	15
11	A11	16
11	A11	17
11	A11	18
11	A11	19
11	A11	20
11	A11	21
11	A11	22
11	A11	23
11	A11	24
11	A11	25
11	A11	26
11	A11	27
11	A11	28
11	A11	29
11	A11	30
11	A11	31
11	A11	32
11	A11	33
11	A11	34
11	A11	35
11	A11	36
11	A11	37
11	A11	38
11	A11	39
11	A11	40
12	A12	1
12	A12	2
12	A12	3
12	A12	4
12	A12	5
12	A12	6
12	A12	7
12	A12	8
12	A12	9
12	A12	10
12	A12	11
12	A12	12
12	A12	13
12	A12	14
12	A12	15
12	A12	16
12	A12	17
12	A12	18
12	A12	19
12	A12	20
12	A12	21
12	A12	22
12	A12	23
12	A12	24
12	A12	25
12	A12	26
12	A12	27
12	A12	28
12	A12	29
12	A12	30
12	A12	31
12	A12	32
12	A12	33
12	A12	34
12	A12	35
12	A12	36
12	A12	37
12	A12	38
12	A12	39
12	A12	40
13	B1	1	SCARB1	0.0899642	0.00370529
13	B1	2	SCARB1	0.0895106	0.00316585
13	B1	3	SCARB1	0.0870969	0.000666221
13	B1	4	SCARB1	0.0861866	-0.000329873
13	B1	5	SCARB1	0.0855135	-0.00108885
13	B1	6	SCARB1	0.0854423	-0.00124595
13	B1	7	SCARB1	0.0858193	-0.00095475
13	B1	8	SCARB1	0.085851	-0.00100889
13	B1	9	SCARB1	0.0869955	4.97295e-05
13	B1	10	SCARB1	0.0901357	0.00310406
13	B1	11	SCARB1	0.0900125	0.00289502
13	B1	12	SCARB1	0.0886338	0.00143049
13	B1	13	SCARB1	0.0876044	0.000315186
13	B1	14	SCARB1	0.0870049	-0.000370212
13	B1	15	SCARB1	0.0863725	-0.00108838
13	B1	16	SCARB1	0.085521	-0.0020258
13	B1	17	SCARB1	0.0858327	-0.00179996
13	B1	18	SCARB1	0.0887306	0.00101215
13	B1	19	SCARB1	0.0879	9.56831e-05
13	B1	20	SCARB1	0.0882343	0.000344126
13	B1	21	SCARB1	0.0944801	0.00650406
13	B1	22	SCARB1	0.0990302	0.0109683
13	B1	23	SCARB1	0.110199	0.0220516
13	B1	24	SCARB1	0.13475	0.0465167
13	B1	25	SCARB1	0.175239	0.0869196
13	B1	26	SCARB1	0.245167	0.156761
13	B1	27	SCARB1	0.356626	0.268135
13	B1	28	SCARB1	0.494992	0.406415
13	B1	29	SCARB1	0.629253	0.54059
13	B1	30	SCARB1	0.740895	0.652147
13	B1	31	SCARB1	0.815883	0.727048
13	B1	32	SCARB1	0.859157	0.770236
13	B1	33	SCARB1	0.886534	0.797528
13	B1	34	SCARB1	0.905608	0.816515
13	B1	35	SCARB1	0.918585	0.829407
13	B1	36	SCARB1	0.923536	0.834272
13	B1	37	SCARB1	0.928847	0.839498
13	B1	38	SCARB1	0.935374	0.845938
13	B1	39	SCARB1	0.942351	0.852829
13	B1	40	SCARB1	0.942918	0.853311
14	B2	1	SCARB1	0.0312252	0.00496013
14	B2	2	SCARB1	0.0309155	0.00431194
14	B2	3	SCARB1	0.0276295	0.000687325
14	B2	4	SCARB1	0.027277	-3.62051e-06
14	B2	5	SCARB1	0.0295851	0.00196591
14	B2	6	SCARB1	0.0306257	0.002668
14	B2	7	SCARB1	0.0280182	-0.00027807
14	B2	8	SCARB1	0.0268871	-0.00174761
14	B2	9	SCARB1	0.0271015	-0.00187174
14	B2	10	SCARB1	0.0284618	-0.000850041
14	B2	11	SCARB1	0.0288054	-0.000844921
14	B2	12	SCARB1	0.0299612	-2.76695e-05
14	B2	13	SCARB1	0.0302809	-4.65237e-05
14	B2	14	SCARB1	0.030858	0.000192075
14	B2	15	SCARB1	0.0306062	-0.000398196
14	B2	16	SCARB1	0.0306148	-0.000728121
14	B2	17	SCARB1	0.0292298	-0.00245168
14	B2	18	SCARB1	0.0296298	-0.00239021
14	B2	19	SCARB1	0.0341243	0.00176574
14	B2	20	SCARB1	0.0345371	0.00184006
14	B2	21	SCARB1	0.0355549	0.0025193
14	B2	22	SCARB1	0.0423013	0.00892723
14	B2	23	SCARB1	0.052373	0.0186604
14	B2	24	SCARB1	0.073319	0.0392679
14	B2	25	SCARB1	0.108278	0.0738884
14	B2	26	SCARB1	0.170938	0.136209
14	B2	27	SCARB1	0.268329	0.233263
14	B2	28	SCARB1	0.403428	0.368023
14	B2	29	SCARB1	0.550835	0.515091
14	B2	30	SCARB1	0.679339	0.643257
14	B2	31	SCARB1	0.772534	0.736113
14	B2	32	SCARB1	0.824152	0.787393
14	B2	33	SCARB1	0.85444	0.817342
14	B2	34	SCARB1	0.879066	0.84163
14	B2	35	SCARB1	0.895134	0.857359
14	B2	36	SCARB1	0.902947	0.864833
14	B2	37	SCARB1	0.909215	0.870763
14	B2	38	SCARB1	0.914642	0.875851
14	B2	39	SCARB1	0.919901	0.880772
14	B2	40	SCARB1	0.924008	0.884541
15	B3	1	SCARB1	0.0602297	0.00166748
15	B3	2	SCARB1	0.0602392	0.00142524
15	B3	3	SCARB1	0.0613487	0.00228299
15	B3	4	SCARB1	0.0586927	-0.000624767
15	B3	5	SCARB1	0.0580883	-0.00148095
15	B3	6	SCARB1	0.0587934	-0.00102755
15	B3	7	SCARB1	0.0590823	-0.00099046
15	B3	8	SCARB1	0.0603606	3.6124e-05
15	B3	9	SCARB1	0.0610862	0.000510009
15	B3	10	SCARB1	0.063882	0.00305404
15	B3	11	SCARB1	0.062112	0.00103224
15	B3	12	SCARB1	0.0593999	-0.00193155
15	B3	13	SCARB1	0.0596365	-0.0019468
15	B3	14	SCARB1	0.063152	0.001317
15	B3	15	SCARB1	0.0627481	0.00066136
15	B3	16	SCARB1	0.0619833	-0.000355258
15	B3	17	SCARB1	0.0618306	-0.00075971
15	B3	18	SCARB1	0.0614577	-0.00138432
15	B3	19	SCARB1	0.0622211	-0.000872679
15	B3	20	SCARB1	0.0658258	0.00248029
15	B3	21	SCARB1	0.0712005	0.00760316
15	B3	22	SCARB1	0.079354	0.0155049
15	B3	23	SCARB1	0.0911336	0.0270328
15	B3	24	SCARB1	0.116776	0.0524234
15	B3	25	SCARB1	0.16512	0.100516
15	B3	26	SCARB1	0.243996	0.17914
15	B3	27	SCARB1	0.360353	0.295245
15	B3	28	SCARB1	0.508083	0.442724
15	B3	29	SCARB1	0.652574	0.586963
15	B3	30	SCARB1	0.765863	0.7
15	B3	31	SCARB1	0.841465	0.77535
15	B3	32	SCARB1	0.886313	0.819946
15	B3	33	SCARB1	0.912486	0.845868
15	B3	34	SCARB1	0.929872	0.863002
15	B3	35	SCARB1	0.944827	0.877705
15	B3	36	SCARB1	0.95498	0.887606
15	B3	37	SCARB1	0.960437	0.892812
15	B3	38	SCARB1	0.965708	0.897831
15	B3	39	SCARB1	0.967623	0.899494
15	B3	40	SCARB1	0.968079	0.899698
16	B4	1	SCARB1	0.0477426	-0.00191216
16	B4	2	SCARB1	0.0479487	-0.00172654
16	B4	3	SCARB1	0.0507223	0.00102664
16	B4	4	SCARB1	0.0513752	0.00165909
16	B4	5	SCARB1	0.050628	0.000891495
16	B4	6	SCARB1	0.0502882	0.000531239
16	B4	7	SCARB1	0.0506059	0.000828515
16	B4	8	SCARB1	0.0492642	-0.000533673
16	B4	9	SCARB1	0.0486199	-0.00119837
16	B4	10	SCARB1	0.0485834	-0.00125536
16	B4	11	SCARB1	0.0492596	-0.000599598
16	B4	12	SCARB1	0.0488455	-0.00103413
16	B4	13	SCARB1	0.0485484	-0.0013517
16	B4	14	SCARB1	0.0487018	-0.00121867
16	B4	15	SCARB1	0.0485751	-0.00136582
16	B4	16	SCARB1	0.04854	-0.00142136
16	B4	17	SCARB1	0.0487471	-0.0012348
16	B4	18	SCARB1	0.0506259	0.000623638
16	B4	19	SCARB1	0.0519986	0.0019759
16	B4	20	SCARB1	0.0537201	0.00367695
16	B4	21	SCARB1	0.058709	0.00864533
16	B4	22	SCARB1	0.067105	0.0170209
16	B4	23	SCARB1	0.0847696	0.0346651
16	B4	24	SCARB1	0.118131	0.0680062
16	B4	25	SCARB1	0.180729	0.130584
16	B4	26	SCARB1	0.276319	0.226153
16	B4	27	SCARB1	0.414573	0.364387
16	B4	28	SCARB1	0.572948	0.522741
16	B4	29	SCARB1	0.706306	0.656079
16	B4	30	SCARB1	0.808534	0.758286
16	B4	31	SCARB1	0.868574	0.818306
16	B4	32	SCARB1	0.902112	0.851823
16	B4	33	SCARB1	0.926692	0.876383
16	B4	34	SCARB1	0.943336	0.893007
16	B4	35	SCARB1	0.954813	0.904464
16	B4	36	SCARB1	0.963192	0.912822
16	B4	37	SCARB1	0.970518	0.920127
16	B4	38	SCARB1	0.973555	0.923144
16	B4	39	SCARB1	0.976135	0.925704
16	B4	40	SCARB1	0.97723	0.926777
17	B5	1	SCARB1	0.024562	0.00319339
17	B5	2	SCARB1	0.0244632	0.00270364
17	B5	3	SCARB1	0.0250646	0.00291407
17	B5	4	SCARB1	0.0225408	-7.87707e-07
17	B5	5	SCARB1	0.0220647	-0.000867934
17	B5	6	SCARB1	0.0231314	-0.000192207
17	B5	7	SCARB1	0.0236109	-0.000103666
17	B5	8	SCARB1	0.0236143	-0.000491343
17	B5	9	SCARB1	0.02495	0.000453428
17	B5	10	SCARB1	0.0265671	0.00167954
17	B5	11	SCARB1	0.0262151	0.000936449
17	B5	12	SCARB1	0.0252172	-0.000452421
17	B5	13	SCARB1	0.0242365	-0.00182411
17	B5	14	SCARB1	0.0226061	-0.00384552
17	B5	15	SCARB1	0.0226786	-0.00416402
17	B5	16	SCARB1	0.0255188	-0.00171486
17	B5	17	SCARB1	0.028313	0.0006884
17	B5	18	SCARB1	0.0293221	0.00130651
17	B5	19	SCARB1	0.0340851	0.00567846
17	B5	20	SCARB1	0.0398069	0.0110092
17	B5	21	SCARB1	0.0519831	0.0227945
17	B5	22	SCARB1	0.074049	0.0444694
17	B5	23	SCARB1	0.115498	0.0855274
17	B5	24	SCARB1	0.185092	0.15473
17	B5	25	SCARB1	0.297209	0.266456
17	B5	26	SCARB1	0.442469	0.411326
17	B5	27	SCARB1	0.597631	0.566097
17	B5	28	SCARB1	0.72887	0.696945
17	B5	29	SCARB1	0.816381	0.784065
17	B5	30	SCARB1	0.873092	0.840384
17	B5	31	SCARB1	0.907387	0.874289
17	B5	32	SCARB1	0.928271	0.894782
17	B5	33	SCARB1	0.946761	0.91288
17	B5	34	SCARB1	0.959226	0.924954
17	B5	35	SCARB1	0.968903	0.93424
17	B5	36	SCARB1	0.973964	0.93891
17	B5	37	SCARB1	0.978308	0.942864
17	B5	38	SCARB1	0.982071	0.946235
17	B5	39	SCARB1	0.984409	0.948182
17	B5	40	SCARB1	0.986673	0.950055
18	B6	1	SCARB1	0.0386145	0.00737093
18	B6	2	SCARB1	0.0380288	0.00650419
18	B6	3	SCARB1	0.0349478	0.00314212
18	B6	4	SCARB1	0.0334489	0.00136213
18	B6	5	SCARB1	0.0317103	-0.000657544
18	B6	6	SCARB1	0.0314238	-0.00122513
18	B6	7	SCARB1	0.0317752	-0.00115477
18	B6	8	SCARB1	0.03175	-0.00146109
18	B6	9	SCARB1	0.0326546	-0.00083752
18	B6	10	SCARB1	0.0352705	0.00149725
18	B6	11	SCARB1	0.0351427	0.00108845
18	B6	12	SCARB1	0.0337176	-0.000617745
18	B6	13	SCARB1	0.0334536	-0.00116286
18	B6	14	SCARB1	0.034449	-0.000448485
18	B6	15	SCARB1	0.033399	-0.00177958
18	B6	16	SCARB1	0.0330395	-0.00242009
18	B6	17	SCARB1	0.0344553	-0.00128542
18	B6	18	SCARB1	0.037063	0.00104123
18	B6	19	SCARB1	0.0412219	0.00491905
18	B6	20	SCARB1	0.0469663	0.0103824
18	B6	21	SCARB1	0.0596382	0.0227732
18	B6	22	SCARB1	0.0786393	0.0414932
18	B6	23	SCARB1	0.120559	0.0831315
18	B6	24	SCARB1	0.1932	0.155492
18	B6	25	SCARB1	0.304243	0.266253
18	B6	26	SCARB1	0.449321	0.411051
18	B6	27	SCARB1	0.605456	0.566905
18	B6	28	SCARB1	0.735965	0.697133
18	B6	29	SCARB1	0.828032	0.788919
18	B6	30	SCARB1	0.885768	0.846373
18	B6	31	SCARB1	0.920651	0.880975
18	B6	32	SCARB1	0.942047	0.90209
18	B6	33	SCARB1	0.956619	0.916381
18	B6	34	SCARB1	0.96956	0.929041
18	B6	35	SCARB1	0.980579	0.939779
18	B6	36	SCARB1	0.983158	0.942077
18	B6	37	SCARB1	0.986747	0.945385
18	B6	38	SCARB1	0.994076	0.952433
18	B6	39	SCARB1	0.999086	0.957161
18	B6	40	SCARB1	1.00056	0.958356
19	B7	1	SCARB1	0.0213328	0.000459437
19	B7	2	SCARB1	0.020037	-0.00101646
19	B7	3	SCARB1	0.0198383	-0.00139522
19	B7	4	SCARB1	0.0215317	0.000117993
19	B7	5	SCARB1	0.0219177	0.000323956
19	B7	6	SCARB1	0.0232202	0.00144626
19	B7	7	SCARB1	0.0239687	0.00201464
19	B7	8	SCARB1	0.0227852	0.000651116
19	B7	9	SCARB1	0.0220765	-0.000237774
19	B7	10	SCARB1	0.0220963	-0.000398072
19	B7	11	SCARB1	0.0225056	-0.000168908
19	B7	12	SCARB1	0.0228595	4.87795e-06
19	B7	13	SCARB1	0.0226626	-0.000372042
19	B7	14	SCARB1	0.021882	-0.00133282
19	B7	15	SCARB1	0.0205196	-0.00287535
19	B7	16	SCARB1	0.0206543	-0.0029207
19	B7	17	SCARB1	0.0236322	-0.000122918
19	B7	18	SCARB1	0.0264972	0.00256192
19	B7	19	SCARB1	0.0268184	0.00270302
19	B7	20	SCARB1	0.0302797	0.00598422
19	B7	21	SCARB1	0.0422778	0.0178022
19	B7	22	SCARB1	0.0635192	0.0388635
19	B7	23	SCARB1	0.0972295	0.0723937
19	B7	24	SCARB1	0.16154	0.136524
19	B7	25	SCARB1	0.262691	0.237495
19	B7	26	SCARB1	0.403045	0.377669
19	B7	27	SCARB1	0.559738	0.534181
19	B7	28	SCARB1	0.694892	0.669155
19	B7	29	SCARB1	0.788762	0.762845
19	B7	30	SCARB1	0.849171	0.823074
19	B7	31	SCARB1	0.888562	0.862285
19	B7	32	SCARB1	0.91268	0.886223
19	B7	33	SCARB1	0.931735	0.905098
19	B7	34	SCARB1	0.9438	0.916983
19	B7	35	SCARB1	0.952449	0.925452
19	B7	36	SCARB1	0.959578	0.932401
19	B7	37	SCARB1	0.965896	0.938538
19	B7	38	SCARB1	0.969468	0.94193
19	B7	39	SCARB1	0.969515	0.941797
19	B7	40	SCARB1	0.971615	0.943717
20	B8	1	SCARB1	0.0296646	0.00408298
20	B8	2	SCARB1	0.0292021	0.00352921
20	B8	3	SCARB1	0.0273177	0.00155354
20	B8	4	SCARB1	0.0264027	0.000547286
20	B8	5	SCARB1	0.0257627	-0.000183983
20	B8	6	SCARB1	0.0255045	-0.000533417
20	B8	7	SCARB1	0.0262447	0.000115501
20	B8	8	SCARB1	0.0268399	0.000619479
20	B8	9	SCARB1	0.0265554	0.000243684
20	B8	10	SCARB1	0.0265273	0.000124321
20	B8	11	SCARB1	0.0267085	0.000214249
20	B8	12	SCARB1	0.0247317	-0.00185377
20	B8	13	SCARB1	0.0244699	-0.00220685
20	B8	14	SCARB1	0.0255305	-0.00123756
20	B8	15	SCARB1	0.0257591	-0.00110012
20	B8	16	SCARB1	0.0265811	-0.000369464
20	B8	17	SCARB1	0.0269181	-0.000123719
20	B8	18	SCARB1	0.0282689	0.00113588
20	B8	19	SCARB1	0.0302793	0.00305494
20	B8	20	SCARB1	0.0341435	0.00682796
20	B8	21	SCARB1	0.0423406	0.0149337
20	B8	22	SCARB1	0.0609669	0.0334688
20	B8	23	SCARB1	0.0936218	0.0660325
20	B8	24	SCARB1	0.154192	0.126511
20	B8	25	SCARB1	0.247509	0.219737
20	B8	26	SCARB1	0.377998	0.350134
20	B8	27	SCARB1	0.533474	0.505519
20	B8	28	SCARB1	0.673818	0.645772
20	B8	29	SCARB1	0.776673	0.748536
20	B8	30	SCARB1	0.842165	0.813936
20	B8	31	SCARB1	0.884801	0.856481
20	B8	32	SCARB1	0.911003	0.882593
20	B8	33	SCARB1	0.929231	0.900729
20	B8	34	SCARB1	0.941171	0.912578
20	B8	35	SCARB1	0.951067	0.922383
20	B8	36	SCARB1	0.956581	0.927805
20	B8	37	SCARB1	0.961535	0.932668
20	B8	38	SCARB1	0.964358	0.9354
20	B8	39	SCARB1	0.965812	0.936763
20	B8	40	SCARB1	0.965336	0.936196
21	B9	1	GAPD	0.267607	0.00206685
21	B9	2	GAPD	0.267464	0.00201386
21	B9	3	GAPD	0.267702	0.00234109
21	B9	4	GAPD	0.267337	0.00206567
21	B9	5	GAPD	0.266754	0.00157295
21	B9	6	GAPD	0.265602	0.00051023
21	B9	7	GAPD	0.262578	-0.00242413
21	B9	8	GAPD	0.262043	-0.00286926
21	B9	9	GAPD	0.263081	-0.0017418
21	B9	10	GAPD	0.264007	-0.000725836
21	B9	11	GAPD	0.263136	-0.00150787
21	B9	12	GAPD	0.262116	-0.00243794
21	B9	13	GAPD	0.262728	-0.00173621
21	B9	14	GAPD	0.266483	0.00210901
21	B9	15	GAPD	0.266258	0.00197371
21	B9	16	GAPD	0.267065	0.0028704
21	B9	17	GAPD	0.274883	0.0107772
21	B9	18	GAPD	0.288436	0.0244208
21	B9	19	GAPD	0.307019	0.0430935
21	B9	20	GAPD	0.342188	0.078352
21	B9	21	GAPD	0.403352	0.139605
21	B9	22	GAPD	0.482715	0.219058
21	B9	23	GAPD	0.568698	0.305131
21	B9	24	GAPD	0.643046	0.379568
21	B9	25	GAPD	0.703742	0.440354
21	B9	26	GAPD	0.753447	0.490149
21	B9	27	GAPD	0.792316	0.529107
21	B9	28	GAPD	0.821108	0.557989
21	B9	29	GAPD	0.841563	0.578534
21	B9	30	GAPD	0.855675	0.592736
21	B9	31	GAPD	0.867801	0.604951
21	B9	32	GAPD	0.876669	0.613909
21	B9	33	GAPD	0.883242	0.620572
21	B9	34	GAPD	0.885773	0.623192
21	B9	35	GAPD	0.887895	0.625404
21	B9	36	GAPD	0.892146	0.629745
21	B9	37	GAPD	0.892592	0.63028
21	B9	38	GAPD	0.892965	0.630743
21	B9	39	GAPD	0.894835	0.632702
21	B9	40	GAPD	0.895449	0.633406
22	B10	1
22	B10	2
22	B10	3
22	B10	4
22	B10	5
22	B10	6
22	B10	7
22	B10	8
22	B10	9
22	B10	10
22	B10	11
22	B10	12
22	B10	13
22	B10	14
22	B10	15
22	B10	16
22	B10	17
22	B10	18
22	B10	19
22	B10	20
22	B10	21
22	B10	22
22	B10	23
22	B10	24
22	B10	25
22	B10	26
22	B10	27
22	B10	28
22	B10	29
22	B10	30
22	B10	31
22	B10	32
22	B10	33
22	B10	34
22	B10	35
22	B10	36
22	B10	37
22	B10	38
22	B10	39
22	B10	40
23	B11	1
23	B11	2
23	B11	3
23	B11	4
23	B11	5
23	B11	6
23	B11	7
23	B11	8
23	B11	9
23	B11	10
23	B11	11
23	B11	12
23	B11	13
23	B11	14
23	B11	15
23	B11	16
23	B11	17
23	B11	18
23	B11	19
23	B11	20
23	B11	21
23	B11	22
23	B11	23
23	B11	24
23	B11	25
23	B11	26
23	B11	27
23	B11	28
23	B11	29
23	B11	30
23	B11	31
23	B11	32
23	B11	33
23	B11	34
23	B11	35
23	B11	36
23	B11	37
23	B11	38
23	B11	39
23	B11	40
24	B12	1
24	B12	2
24	B12	3
24	B12	4
24	B12	5
24	B12	6
24	B12	7
24	B12	8
24	B12	9
24	B12	10
24	B12	11
24	B12	12
24	B12	13
24	B12	14
24	B12	15
24	B12	16
24	B12	17
24	B12	18
24	B12	19
24	B12	20
24	B12	21
24	B12	22
24	B12	23
24	B12	24
24	B12	25
24	B12	26
24	B12	27
24	B12	28
24	B12	29
24	B12	30
24	B12	31
24	B12	32
24	B12	33
24	B12	34
24	B12	35
24	B12	36
24	B12	37
24	B12	38
24	B12	39
24	B12	40
25	C1	1	SEPTIN3	0.129356	0.00389392
25	C1	2	SEPTIN3	0.129242	0.00372454
25	C1	3	SEPTIN3	0.131196	0.00562417
25	C1	4	SEPTIN3	0.130818	0.00519074
25	C1	5	SEPTIN3	0.12714	0.00145824
25	C1	6	SEPTIN3	0.126262	0.000524659
25	C1	7	SEPTIN3	0.12714	0.00134805
25	C1	8	SEPTIN3	0.122854	-0.00299304
25	C1	9	SEPTIN3	0.122516	-0.0033857
25	C1	10	SEPTIN3	0.125545	-0.000411483
25	C1	11	SEPTIN3	0.123151	-0.0028597
25	C1	12	SEPTIN3	0.122733	-0.00333323
25	C1	13	SEPTIN3	0.124994	-0.00112669
25	C1	14	SEPTIN3	0.125303	-0.000872768
25	C1	15	SEPTIN3	0.125028	-0.00120293
25	C1	16	SEPTIN3	0.12476	-0.00152568
25	C1	17	SEPTIN3	0.125231	-0.00110938
25	C1	18	SEPTIN3	0.125008	-0.00138674
25	C1	19	SEPTIN3	0.125956	-0.000494341
25	C1	20	SEPTIN3	0.127284	0.000779114
25	C1	21	SEPTIN3	0.127671	0.00111104
25	C1	22	SEPTIN3	0.125632	-0.000982511
25	C1	23	SEPTIN3	0.124701	-0.00196884
25	C1	24	SEPTIN3	0.124598	-0.00212595
25	C1	25	SEPTIN3	0.124491	-0.00228827
25	C1	26	SEPTIN3	0.127312	0.000478259
25	C1	27	SEPTIN3	0.131584	0.00469529
25	C1	28	SEPTIN3	0.133802	0.00685769
25	C1	29	SEPTIN3	0.141507	0.014508
25	C1	30	SEPTIN3	0.159259	0.0322054
25	C1	31	SEPTIN3	0.187842	0.0607336
25	C1	32	SEPTIN3	0.243924	0.116761
25	C1	33	SEPTIN3	0.335375	0.208157
25	C1	34	SEPTIN3	0.464014	0.336741
25	C1	35	SEPTIN3	0.603831	0.476503
25	C1	36	SEPTIN3	0.725902	0.598519
25	C1	37	SEPTIN3	0.813518	0.68608
25	C1	38	SEPTIN3	0.863028	0.735536
25	C1	39	SEPTIN3	0.89301	0.765463
25	C1	40	SEPTIN3	0.904989	0.777386
26	C2	1	SEPTIN3	0.132662	0.00671163
26	C2	2	SEPTIN3	0.131918	0.00485772
26	C2	3	SEPTIN3	0.131234	0.00306224
26	C2	4	SEPTIN3	0.130428	0.00114585
26	C2	5	SEPTIN3	0.130268	-0.000125417
26	C2	6	SEPTIN3	0.13159	8.59177e-05
26	C2	7	SEPTIN3	0.132577	-3.76811e-05
26	C2	8	SEPTIN3	0.133998	0.000271912
26	C2	9	SEPTIN3	0.133893	-0.000943853
26	C2	10	SEPTIN3	0.133613	-0.00233432
26	C2	11	SEPTIN3	0.133824	-0.00323461
26	C2	12	SEPTIN3	0.134816	-0.00335335
26	C2	13	SEPTIN3	0.14098	0.00170007
26	C2	14	SEPTIN3	0.141415	0.00102385
26	C2	15	SEPTIN3	0.142321	0.000818993
26	C2	16	SEPTIN3	0.142179	-0.000433741
26	C2	17	SEPTIN3	0.14336	-0.000363118
26	C2	18	SEPTIN3	0.145977	0.00114302
26	C2	19	SEPTIN3	0.146817	0.000871634
26	C2	20	SEPTIN3	0.148225	0.0011695
26	C2	21	SEPTIN3	0.148554	0.000387076
26	C2	22	SEPTIN3	0.148465	-0.00081261
26	C2	23	SEPTIN3	0.148314	-0.00207454
26	C2	24	SEPTIN3	0.151823	0.000323274
26	C2	25	SEPTIN3	0.152409	-0.000201003
26	C2	26	SEPTIN3	0.154629	0.000908112
26	C2	27	SEPTIN3	0.155835	0.00100279
26	C2	28	SEPTIN3	0.158751	0.00280863
26	C2	29	SEPTIN3	0.168024	0.0109709
26	C2	30	SEPTIN3	0.186825	0.0286611
26	C2	31	SEPTIN3	0.217919	0.0586435
26	C2	32	SEPTIN3	0.27417	0.113784
26	C2	33	SEPTIN3	0.365921	0.204424
26	C2	34	SEPTIN3	0.49498	0.332372
26	C2	35	SEPTIN3	0.639461	0.475742
26	C2	36	SEPTIN3	0.767102	0.602273
26	C2	37	SEPTIN3	0.857377	0.691436
26	C2	38	SEPTIN3	0.909139	0.742088
26	C2	39	SEPTIN3	0.935822	0.76766
26	C2	40	SEPTIN3	0.948724	0.779451
27	C3	1	SEPTIN3	0.116991	-0.00251423
27	C3	2	SEPTIN3	0.116933	-0.00297623
27	C3	3	SEPTIN3	0.11809	-0.00222326
27	C3	4	SEPTIN3	0.120254	-0.000462471
27	C3	5	SEPTIN3	0.11971	-0.00141038
27	C3	6	SEPTIN3	0.119314	-0.00221081
27	C3	7	SEPTIN3	0.120457	-0.00147125
27	C3	8	SEPTIN3	0.12283	0.000497437
27	C3	9	SEPTIN3	0.124217	0.00148052
27	C3	10	SEPTIN3	0.125678	0.00253698
27	C3	11	SEPTIN3	0.126748	0.00320364
27	C3	12	SEPTIN3	0.126183	0.0022341
27	C3	13	SEPTIN3	0.125966	0.00161399
27	C3	14	SEPTIN3	0.126622	0.00186566
27	C3	15	SEPTIN3	0.125957	0.000796511
27	C3	16	SEPTIN3	0.124822	-0.000741824
27	C3	17	SEPTIN3	0.124685	-0.00128335
27	C3	18	SEPTIN3	0.127357	0.0009845
27	C3	19	SEPTIN3	0.127387	0.000611145
27	C3	20	SEPTIN3	0.12639	-0.000789689
27	C3	21	SEPTIN3	0.125858	-0.00172579
27	C3	22	SEPTIN3	0.125599	-0.0023894
27	C3	23	SEPTIN3	0.126478	-0.00191388
27	C3	24	SEPTIN3	0.127838	-0.000958232
27	C3	25	SEPTIN3	0.127841	-0.00135865
27	C3	26	SEPTIN3	0.12976	0.000156139
27	C3	27	SEPTIN3	0.1316	0.00159216
27	C3	28	SEPTIN3	0.131778	0.00136621
27	C3	29	SEPTIN3	0.137209	0.00639333
27	C3	30	SEPTIN3	0.151871	0.0206519
27	C3	31	SEPTIN3	0.174178	0.0425546
27	C3	32	SEPTIN3	0.217056	0.0850287
27	C3	33	SEPTIN3	0.288994	0.156563
27	C3	34	SEPTIN3	0.400886	0.268051
27	C3	35	SEPTIN3	0.538935	0.405696
27	C3	36	SEPTIN3	0.67454	0.540896
27	C3	37	SEPTIN3	0.781271	0.647224
27	C3	38	SEPTIN3	0.850785	0.716334
27	C3	39	SEPTIN3	0.887248	0.752393
27	C3	40	SEPTIN3	0.906594	0.771335
28	C4	1	SEPTIN3	0.136886	0.000352275
28	C4	2	SEPTIN3	0.136605	0.000340602
28	C4	3	SEPTIN3	0.137198	0.00120369
28	C4	4	SEPTIN3	0.136414	0.000688966
28	C4	5	SEPTIN3	0.135706	0.000251105
28	C4	6	SEPTIN3	0.136221	0.00103566
28	C4	7	SEPTIN3	0.137722	0.00280664
28	C4	8	SEPTIN3	0.136392	0.00174642
28	C4	9	SEPTIN3	0.135591	0.00121526
28	C4	10	SEPTIN3	0.134998	0.000891843
28	C4	11	SEPTIN3	0.130887	-0.00294864
28	C4	12	SEPTIN3	0.130298	-0.00326835
28	C4	13	SEPTIN3	0.13316	-0.000136293
28	C4	14	SEPTIN3	0.133288	0.000261279
28	C4	15	SEPTIN3	0.132396	-0.000360596
28	C4	16	SEPTIN3	0.131448	-0.00103898
28	C4	17	SEPTIN3	0.13109	-0.00112779
28	C4	18	SEPTIN3	0.131458	-0.000489895
28	C4	19	SEPTIN3	0.129564	-0.00211358
28	C4	20	SEPTIN3	0.129122	-0.00228612
28	C4	21	SEPTIN3	0.130201	-0.000937482
28	C4	22	SEPTIN3	0.129713	-0.00115509
28	C4	23	SEPTIN3	0.127777	-0.00282158
28	C4	24	SEPTIN3	0.127612	-0.00271723
28	C4	25	SEPTIN3	0.129085	-0.000974458
28	C4	26	SEPTIN3	0.130868	0.00107845
28	C4	27	SEPTIN3	0.133136	0.00361603
28	C4	28	SEPTIN3	0.136831	0.00758073
28	C4	29	SEPTIN3	0.142564	0.013584
28	C4	30	SEPTIN3	0.155583	0.0268729
28	C4	31	SEPTIN3	0.180437	0.0519969
28	C4	32	SEPTIN3	0.222404	0.0942328
28	C4	33	SEPTIN3	0.299151	0.17125
28	C4	34	SEPTIN3	0.413736	0.286105
28	C4	35	SEPTIN3	0.560964	0.433603
28	C4	36	SEPTIN3	0.703008	0.575916
28	C4	37	SEPTIN3	0.811817	0.684995
28	C4	38	SEPTIN3	0.883531	0.756979
28	C4	39	SEPTIN3	0.921214	0.794932
28	C4	40	SEPTIN3	0.935062	0.80905
29	C5	1	SEPTIN3	0.0920132	-0.000580875
29	C5	2	SEPTIN3	0.0919112	-0.000926457
29	C5	3	SEPTIN3	0.0920586	-0.00102269
29	C5	4	SEPTIN3	0.0930945	-0.000230464
29	C5	5	SEPTIN3	0.0936619	9.3299e-05
29	C5	6	SEPTIN3	0.094894	0.00108175
29	C5	7	SEPTIN3	0.0948553	0.000799424
29	C5	8	SEPTIN3	0.094967	0.000667548
29	C5	9	SEPTIN3	0.0954964	0.000953238
29	C5	10	SEPTIN3	0.0974644	0.00267764
29	C5	11	SEPTIN3	0.092754	-0.00227635
29	C5	12	SEPTIN3	0.092133	-0.00314102
29	C5	13	SEPTIN3	0.0955643	4.66227e-05
29	C5	14	SEPTIN3	0.0965671	0.00080582
29	C5	15	SEPTIN3	0.0962305	0.000225605
29	C5	16	SEPTIN3	0.0964457	0.00019709
29	C5	17	SEPTIN3	0.0972414	0.000749221
29	C5	18	SEPTIN3	0.0980949	0.00135901
29	C5	19	SEPTIN3	0.0977597	0.000780234
29	C5	20	SEPTIN3	0.0973327	0.000109598
29	C5	21	SEPTIN3	0.0961637	-0.00130306
29	C5	22	SEPTIN3	0.0954304	-0.00227994
29	C5	23	SEPTIN3	0.0953812	-0.00257285
29	C5	24	SEPTIN3	0.0954516	-0.00274603
29	C5	25	SEPTIN3	0.0972887	-0.00115257
29	C5	26	SEPTIN3	0.0985297	-0.000155198
29	C5	27	SEPTIN3	0.0999972	0.00106861
29	C5	28	SEPTIN3	0.104438	0.00526545
29	C5	29	SEPTIN3	0.109129	0.0097132
29	C5	30	SEPTIN3	0.120378	0.0207188
29	C5	31	SEPTIN3	0.146284	0.0463811
29	C5	32	SEPTIN3	0.188957	0.0888101
29	C5	33	SEPTIN3	0.265146	0.164755
29	C5	34	SEPTIN3	0.382198	0.281564
29	C5	35	SEPTIN3	0.527355	0.426477
29	C5	36	SEPTIN3	0.67464	0.573519
29	C5	37	SEPTIN3	0.78702	0.685655
29	C5	38	SEPTIN3	0.862474	0.760865
29	C5	39	SEPTIN3	0.907261	0.805409
29	C5	40	SEPTIN3	0.93025	0.828154
30	C6	1	SEPTIN3	0.0887803	0.00316713
30	C6	2	SEPTIN3	0.0894867	0.00371409
30	C6	3	SEPTIN3	0.0880733	0.00214116
30	C6	4	SEPTIN3	0.0873181	0.00122651
30	C6	5	SEPTIN3	0.0874739	0.00122278
30	C6	6	SEPTIN3	0.0871297	0.000719139
30	C6	7	SEPTIN3	0.0869979	0.000427871
30	C6	8	SEPTIN3	0.0875557	0.000826215
30	C6	9	SEPTIN3	0.0882292	0.00134021
30	C6	10	SEPTIN3	0.0861105	-0.000937908
30	C6	11	SEPTIN3	0.0840411	-0.00316684
30	C6	12	SEPTIN3	0.0845716	-0.00279582
30	C6	13	SEPTIN3	0.0878676	0.00034071
30	C6	14	SEPTIN3	0.0876689	-1.74863e-05
30	C6	15	SEPTIN3	0.0872691	-0.000576714
30	C6	16	SEPTIN3	0.0876918	-0.000313547
30	C6	17	SEPTIN3	0.08674	-0.00142477
30	C6	18	SEPTIN3	0.0868894	-0.00143489
30	C6	19	SEPTIN3	0.0903178	0.00183408
30	C6	20	SEPTIN3	0.0906761	0.00203292
30	C6	21	SEPTIN3	0.0891912	0.000388556
30	C6	22	SEPTIN3	0.0856458	-0.0033164
30	C6	23	SEPTIN3	0.0850327	-0.00408889
30	C6	24	SEPTIN3	0.0868839	-0.00239715
30	C6	25	SEPTIN3	0.0872037	-0.00223691
30	C6	26	SEPTIN3	0.0887965	-0.000803592
30	C6	27	SEPTIN3	0.0919878	0.00222832
30	C6	28	SEPTIN3	0.0932154	0.00329641
30	C6	29	SEPTIN3	0.0955645	0.005486
30	C6	30	SEPTIN3	0.100132	0.00989447
30	C6	31	SEPTIN3	0.115205	0.0248073
30	C6	32	SEPTIN3	0.138331	0.0477745
30	C6	33	SEPTIN3	0.179589	0.0888731
30	C6	34	SEPTIN3	0.257413	0.166537
30	C6	35	SEPTIN3	0.375574	0.284539
30	C6	36	SEPTIN3	0.524315	0.43312
30	C6	37	SEPTIN3	0.671091	0.579736
30	C6	38	SEPTIN3	0.792158	0.700645
30	C6	39	SEPTIN3	0.866347	0.774674
30	C6	40	SEPTIN3	0.903898	0.812065
31	C7	1	SEPTIN3	0.0701256	0.00183388
31	C7	2	SEPTIN3	0.0699256	0.00174957
31	C7	3	SEPTIN3	0.0717585	0.0036982
31	C7	4	SEPTIN3	0.0713581	0.00341344
31	C7	5	SEPTIN3	0.0696246	0.00179569
31	C7	6	SEPTIN3	0.0676184	-9.47844e-05
31	C7	7	SEPTIN3	0.0668447	-0.000752795
31	C7	8	SEPTIN3	0.0674448	-3.69554e-05
31	C7	9	SEPTIN3	0.0672687	-9.73547e-05
31	C7	10	SEPTIN3	0.0677289	0.000478496
31	C7	11	SEPTIN3	0.0660796	-0.00105503
31	C7	12	SEPTIN3	0.0648558	-0.00216318
31	C7	13	SEPTIN3	0.0644003	-0.0025029
31	C7	14	SEPTIN3	0.0646579	-0.00212965
31	C7	15	SEPTIN3	0.0653397	-0.00133211
31	C7	16	SEPTIN3	0.0671671	0.000610952
31	C7	17	SEPTIN3	0.067033	0.000592604
31	C7	18	SEPTIN3	0.0661303	-0.000194383
31	C7	19	SEPTIN3	0.0651185	-0.0010905
31	C7	20	SEPTIN3	0.0645576	-0.0015357
31	C7	21	SEPTIN3	0.0641147	-0.0018629
31	C7	22	SEPTIN3	0.0607514	-0.00511047
31	C7	23	SEPTIN3	0.0609793	-0.00476688
31	C7	24	SEPTIN3	0.0654624	-0.00016803
31	C7	25	SEPTIN3	0.0668855	0.00137079
31	C7	26	SEPTIN3	0.0670078	0.0016088
31	C7	27	SEPTIN3	0.0697703	0.00448702
31	C7	28	SEPTIN3	0.0720052	0.00683761
31	C7	29	SEPTIN3	0.0748168	0.00976495
31	C7	30	SEPTIN3	0.0846003	0.0196642
31	C7	31	SEPTIN3	0.101241	0.0364204
31	C7	32	SEPTIN3	0.134323	0.0696181
31	C7	33	SEPTIN3	0.191393	0.126804
31	C7	34	SEPTIN3	0.285072	0.220599
31	C7	35	SEPTIN3	0.420978	0.35662
31	C7	36	SEPTIN3	0.572882	0.50864
31	C7	37	SEPTIN3	0.709318	0.645192
31	C7	38	SEPTIN3	0.806861	0.74285
31	C7	39	SEPTIN3	0.864001	0.800106
31	C7	40	SEPTIN3	0.890615	0.826836
32	C8	1	SEPTIN3	0.0702788	0.00183985
32	C8	2	SEPTIN3	0.0704419	0.00172438
32	C8	3	SEPTIN3	0.0720729	0.00307672
32	C8	4	SEPTIN3	0.0733842	0.00410944
32	C8	5	SEPTIN3	0.070856	0.00130261
32	C8	6	SEPTIN3	0.0703586	0.000526596
32	C8	7	SEPTIN3	0.0715972	0.00148664
32	C8	8	SEPTIN3	0.0700565	-0.000332677
32	C8	9	SEPTIN3	0.0695055	-0.00116227
32	C8	10	SEPTIN3	0.0700312	-0.000915168
32	C8	11	SEPTIN3	0.0703568	-0.000868198
32	C8	12	SEPTIN3	0.0695507	-0.00195287
32	C8	13	SEPTIN3	0.0691639	-0.00261834
32	C8	14	SEPTIN3	0.068841	-0.00321984
32	C8	15	SEPTIN3	0.0693419	-0.00299749
32	C8	16	SEPTIN3	0.0714004	-0.00121765
32	C8	17	SEPTIN3	0.0721033	-0.000793326
32	C8	18	SEPTIN3	0.0719562	-0.00121905
32	C8	19	SEPTIN3	0.0731426	-0.000311264
32	C8	20	SEPTIN3	0.0749985	0.00126607
32	C8	21	SEPTIN3	0.0747244	0.000713313
32	C8	22	SEPTIN3	0.0729804	-0.00130924
32	C8	23	SEPTIN3	0.0727099	-0.00185834
32	C8	24	SEPTIN3	0.0745787	-0.000268192
32	C8	25	SEPTIN3	0.0752447	0.000119246
32	C8	26	SEPTIN3	0.0778461	0.00244206
32	C8	27	SEPTIN3	0.0780954	0.00241272
32	C8	28	SEPTIN3	0.0795498	0.0035885
32	C8	29	SEPTIN3	0.0841256	0.00788569
32	C8	30	SEPTIN3	0.0938223	0.0173038
32	C8	31	SEPTIN3	0.109919	0.0331215
32	C8	32	SEPTIN3	0.140999	0.0639232
32	C8	33	SEPTIN3	0.198055	0.120701
32	C8	34	SEPTIN3	0.292275	0.214642
32	C8	35	SEPTIN3	0.426691	0.348779
32	C8	36	SEPTIN3	0.575105	0.496915
32	C8	37	SEPTIN3	0.70432	0.625851
32	C8	38	SEPTIN3	0.798872	0.720125
32	C8	39	SEPTIN3	0.856007	0.776981
32	C8	40	SEPTIN3	0.88891	0.809606
33	C9	1	GAPD	0.284307	-0.00130763
33	C9	2	GAPD	0.283793	-0.00149144
33	C9	3	GAPD	0.284028	-0.000925768
33	C9	4	GAPD	0.28481	0.000185938
33	C9	5	GAPD	0.284413	0.000119529
33	C9	6	GAPD	0.284057	9.37697e-05
33	C9	7	GAPD	0.283891	0.000257494
33	C9	8	GAPD	0.282795	-0.00050787
33	C9	9	GAPD	0.28303	5.71127e-05
33	C9	10	GAPD	0.283437	0.000793876
33	C9	11	GAPD	0.282768	0.000455699
33	C9	12	GAPD	0.282975	0.000992846
33	C9	13	GAPD	0.282095	0.000443102
33	C9	14	GAPD	0.279842	-0.00147978
33	C9	15	GAPD	0.280506	-0.000485946
33	C9	16	GAPD	0.285501	0.00483963
33	C9	17	GAPD	0.293073	0.012742
33	C9	18	GAPD	0.308201	0.0282001
33	C9	19	GAPD	0.331318	0.0516473
33	C9	20	GAPD	0.373052	0.0937113
33	C9	21	GAPD	0.438911	0.1599
33	C9	22	GAPD	0.521	0.24232
33	C9	23	GAPD	0.605982	0.327632
33	C9	24	GAPD	0.677023	0.399003
33	C9	25	GAPD	0.734133	0.456443
33	C9	26	GAPD	0.782367	0.505008
33	C9	27	GAPD	0.820575	0.543546
33	C9	28	GAPD	0.84891	0.572211
33	C9	29	GAPD	0.86769	0.591321
33	C9	30	GAPD	0.881263	0.605224
33	C9	31	GAPD	0.889993	0.614284
33	C9	32	GAPD	0.897212	0.621834
33	C9	33	GAPD	0.905333	0.630285
33	C9	34	GAPD	0.910687	0.635969
33	C9	35	GAPD	0.913001	0.638613
33	C9	36	GAPD	0.915154	0.641097
33	C9	37	GAPD	0.917393	0.643666
33	C9	38	GAPD	0.917169	0.643771
33	C9	39	GAPD	0.916978	0.643912
33	C9	40	GAPD	0.915832	0.643095
34	C10	1
34	C10	2
34	C10	3
34	C10	4
34	C10	5
34	C10	6
34	C10	7
34	C10	8
34	C10	9
34	C10	10
34	C10	11
34	C10	12
34	C10	13
34	C10	14
34	C10	15
34	C10	16
34	C10	17
34	C10	18
34	C10	19
34	C10	20
34	C10	21
34	C10	22
34	C10	23
34	C10	24
34	C10	25
34	C10	26
34	C10	27
34	C10	28
34	C10	29
34	C10	30
34	C10	31
34	C10	32
34	C10	33
34	C10	34
34	C10	35
34	C10	36
34	C10	37
34	C10	38
34	C10	39
34	C10	40
35	C11	1
35	C11	2
35	C11	3
35	C11	4
35	C11	5
35	C11	6
35	C11	7
35	C11	8
35	C11	9
35	C11	10
35	C11	11
35	C11	12
35	C11	13
35	C11	14
35	C11	15
35	C11	16
35	C11	17
35	C11	18
35	C11	19
35	C11	20
35	C11	21
35	C11	22
35	C11	23
35	C11	24
35	C11	25
35	C11	26
35	C11	27
35	C11	28
35	C11	29
35	C11	30
35	C11	31
35	C11	32
35	C11	33
35	C11	34
35	C11	35
35	C11	36
35	C11	37
35	C11	38
35	C11	39
35	C11	40
36	C12	1
36	C12	2
36	C12	3
36	C12	4
36	C12	5
36	C12	6
36	C12	7
36	C12	8
36	C12	9
36	C12	10
36	C12	11
36	C12	12
36	C12	13
36	C12	14
36	C12	15
36	C12	16
36	C12	17
36	C12	18
36	C12	19
36	C12	20
36	C12	21
36	C12	22
36	C12	23
36	C12	24
36	C12	25
36	C12	26
36	C12	27
36	C12	28
36	C12	29
36	C12	30
36	C12	31
36	C12	32
36	C12	33
36	C12	34
36	C12	35
36	C12	36
36	C12	37
36	C12	38
36	C12	39
36	C12	40
37	D1	1	CHML	0.150726	0.00190256
37	D1	2	CHML	0.151555	0.00229405
37	D1	3	CHML	0.151813	0.00211447
37	D1	4	CHML	0.151085	0.000949133
37	D1	5	CHML	0.150788	0.000214349
37	D1	6	CHML	0.152761	0.00174952
37	D1	7	CHML	0.151642	0.000192519
37	D1	8	CHML	0.147674	-0.00421273
37	D1	9	CHML	0.147809	-0.00451577
37	D1	10	CHML	0.15269	-7.24016e-05
37	D1	11	CHML	0.153367	0.000167187
37	D1	12	CHML	0.152989	-0.000647929
37	D1	13	CHML	0.153071	-0.00100433
37	D1	14	CHML	0.155663	0.00115007
37	D1	15	CHML	0.156202	0.00125168
37	D1	16	CHML	0.156348	0.000960085
37	D1	17	CHML	0.158313	0.00248721
37	D1	18	CHML	0.157957	0.00169386
37	D1	19	CHML	0.157374	0.000673081
37	D1	20	CHML	0.155783	-0.00135562
37	D1	21	CHML	0.155781	-0.00179439
37	D1	22	CHML	0.162952	0.0049381
37	D1	23	CHML	0.174361	0.01591
37	D1	24	CHML	0.18878	0.0298913
37	D1	25	CHML	0.221952	0.0626258
37	D1	26	CHML	0.278255	0.118491
37	D1	27	CHML	0.367644	0.207442
37	D1	28	CHML	0.487547	0.326908
37	D1	29	CHML	0.614925	0.453848
37	D1	30	CHML	0.726222	0.564707
37	D1	31	CHML	0.797521	0.635568
37	D1	32	CHML	0.843337	0.680948
37	D1	33	CHML	0.876182	0.713355
37	D1	34	CHML	0.902056	0.738791
37	D1	35	CHML	0.915146	0.751443
37	D1	36	CHML	0.926775	0.762635
37	D1	37	CHML	0.935861	0.771283
37	D1	38	CHML	0.941525	0.776509
37	D1	39	CHML	0.945323	0.77987
37	D1	40	CHML	0.950509	0.784618
38	D2	1	CHML	0.147525	0.00536658
38	D2	2	CHML	0.146561	0.00383185
38	D2	3	CHML	0.141488	-0.0018128
38	D2	4	CHML	0.140275	-0.00359613
38	D2	5	CHML	0.141558	-0.00288425
38	D2	6	CHML	0.144184	-0.000829216
38	D2	7	CHML	0.145843	0.000258081
38	D2	8	CHML	0.148053	0.00189736
38	D2	9	CHML	0.148985	0.00225765
38	D2	10	CHML	0.15046	0.00316162
38	D2	11	CHML	0.148625	0.000755961
38	D2	12	CHML	0.148183	-0.000257581
38	D2	13	CHML	0.151791	0.00277989
38	D2	14	CHML	0.152683	0.00310072
38	D2	15	CHML	0.152252	0.00209838
38	D2	16	CHML	0.152232	0.0015076
38	D2	17	CHML	0.152322	0.00102658
38	D2	18	CHML	0.150638	-0.00122862
38	D2	19	CHML	0.149436	-0.00300185
38	D2	20	CHML	0.150512	-0.0024968
38	D2	21	CHML	0.151812	-0.0017678
38	D2	22	CHML	0.153182	-0.00096877
38	D2	23	CHML	0.155502	0.000779677
38	D2	24	CHML	0.165949	0.0106559
38	D2	25	CHML	0.180193	0.0243291
38	D2	26	CHML	0.209806	0.0533703
38	D2	27	CHML	0.266274	0.109267
38	D2	28	CHML	0.355475	0.197898
38	D2	29	CHML	0.481002	0.322853
38	D2	30	CHML	0.622382	0.463663
38	D2	31	CHML	0.745871	0.58658
38	D2	32	CHML	0.832257	0.672395
38	D2	33	CHML	0.887162	0.726729
38	D2	34	CHML	0.922304	0.7613
38	D2	35	CHML	0.947239	0.785664
38	D2	36	CHML	0.967109	0.804963
38	D2	37	CHML	0.980217	0.8175
38	D2	38	CHML	0.985808	0.82252
38	D2	39	CHML	0.994936	0.831077
38	D2	40	CHML	0.996573	0.832143
39	D3	1	CHML	0.114838	0.000809899
39	D3	2	CHML	0.114683	0.000180986
39	D3	3	CHML	0.115036	5.99941e-05
39	D3	4	CHML	0.11657	0.00112058
39	D3	5	CHML	0.116398	0.000474518
39	D3	6	CHML	0.116629	0.000231322
39	D3	7	CHML	0.117652	0.000780264
39	D3	8	CHML	0.117055	-0.00029096
39	D3	9	CHML	0.116863	-0.000956753
39	D3	10	CHML	0.118687	0.00039382
39	D3	11	CHML	0.118928	0.000160622
39	D3	12	CHML	0.11974	0.000498921
39	D3	13	CHML	0.118629	-0.00108685
39	D3	14	CHML	0.118165	-0.00202441
39	D3	15	CHML	0.119826	-0.000837704
39	D3	16	CHML	0.121983	0.000845642
39	D3	17	CHML	0.120907	-0.000703857
39	D3	18	CHML	0.120216	-0.00186957
39	D3	19	CHML	0.121651	-0.000907702
39	D3	20	CHML	0.123039	6.20721e-06
39	D3	21	CHML	0.124229	0.000722251
39	D3	22	CHML	0.127365	0.00338366
39	D3	23	CHML	0.132087	0.00763164
39	D3	24	CHML	0.142513	0.0175842
39	D3	25	CHML	0.165378	0.0399755
39	D3	26	CHML	0.205434	0.0795568
39	D3	27	CHML	0.277231	0.15088
39	D3	28	CHML	0.38157	0.254745
39	D3	29	CHML	0.517308	0.390009
39	D3	30	CHML	0.652137	0.524364
39	D3	31	CHML	0.755984	0.627738
39	D3	32	CHML	0.827332	0.698612
39	D3	33	CHML	0.874231	0.745036
39	D3	34	CHML	0.907652	0.777984
39	D3	35	CHML	0.932464	0.802322
39	D3	36	CHML	0.947739	0.817123
39	D3	37	CHML	0.961287	0.830197
39	D3	38	CHML	0.968148	0.836583
39	D3	39	CHML	0.973106	0.841067
39	D3	40	CHML	0.974265	0.841752
40	D4	1	CHML	0.105775	0.00317178
40	D4	2	CHML	0.104396	0.00189428
40	D4	3	CHML	0.102847	0.00044821
40	D4	4	CHML	0.101107	-0.00118944
40	D4	5	CHML	0.100967	-0.00122678
40	D4	6	CHML	0.103222	0.0011306
40	D4	7	CHML	0.102769	0.000779672
40	D4	8	CHML	0.102306	0.000419169
40	D4	9	CHML	0.102921	0.00113655
40	D4	10	CHML	0.102684	0.00100152
40	D4	11	CHML	0.102381	0.00080093
40	D4	12	CHML	0.103104	0.00162623
40	D4	13	CHML	0.10184	0.000464552
40	D4	14	CHML	0.0982431	-0.00302957
40	D4	15	CHML	0.0979079	-0.00326234
40	D4	16	CHML	0.0996268	-0.00144104
40	D4	17	CHML	0.0998701	-0.00109536
40	D4	18	CHML	0.099944	-0.000919041
40	D4	19	CHML	0.101543	0.000782798
40	D4	20	CHML	0.102361	0.00170238
40	D4	21	CHML	0.101724	0.00116804
40	D4	22	CHML	0.101156	0.000702907
40	D4	23	CHML	0.103476	0.00312488
40	D4	24	CHML	0.112961	0.0127125
40	D4	25	CHML	0.128694	0.0285476
40	D4	26	CHML	0.153659	0.0536154
40	D4	27	CHML	0.198322	0.0983803
40	D4	28	CHML	0.271513	0.171674
40	D4	29	CHML	0.384602	0.284865
40	D4	30	CHML	0.529587	0.429953
40	D4	31	CHML	0.671338	0.571806
40	D4	32	CHML	0.77767	0.67824
40	D4	33	CHML	0.849884	0.750557
40	D4	34	CHML	0.894846	0.795621
40	D4	35	CHML	0.927513	0.82839
40	D4	36	CHML	0.949589	0.850569
40	D4	37	CHML	0.965837	0.86692
40	D4	38	CHML	0.977675	0.87886
40	D4	39	CHML	0.984929	0.886216
40	D4	40	CHML	0.984848	0.886238
41	D5	1	CHML	0.0718327	0.00181486
41	D5	2	CHML	0.0716895	0.0014065
41	D5	3	CHML	0.0717926	0.00124449
41	D5	4	CHML	0.0734477	0.00263436
41	D5	5	CHML	0.0723083	0.00122984
41	D5	6	CHML	0.0709117	-0.000431927
41	D5	7	CHML	0.0709601	-0.000648694
41	D5	8	CHML	0.0730887	0.00121477
41	D5	9	CHML	0.0730508	0.000911674
41	D5	10	CHML	0.072434	2.97266e-05
41	D5	11	CHML	0.0709054	-0.00176406
41	D5	12	CHML	0.070797	-0.00213759
41	D5	13	CHML	0.0725797	-0.000620045
41	D5	14	CHML	0.0712953	-0.00216965
41	D5	15	CHML	0.069694	-0.00403608
41	D5	16	CHML	0.070291	-0.0037042
41	D5	17	CHML	0.0741159	-0.000144459
41	D5	18	CHML	0.0746002	7.46256e-05
41	D5	19	CHML	0.0745321	-0.000258631
41	D5	20	CHML	0.0773305	0.00227469
41	D5	21	CHML	0.0816222	0.00630116
41	D5	22	CHML	0.0872344	0.0116483
41	D5	23	CHML	0.101661	0.02581
41	D5	24	CHML	0.131926	0.0558096
41	D5	25	CHML	0.183996	0.107615
41	D5	26	CHML	0.272046	0.195399
41	D5	27	CHML	0.397022	0.32011
41	D5	28	CHML	0.543873	0.466696
41	D5	29	CHML	0.683028	0.605586
41	D5	30	CHML	0.788673	0.710965
41	D5	31	CHML	0.857658	0.779685
41	D5	32	CHML	0.896116	0.817878
41	D5	33	CHML	0.929767	0.851264
41	D5	34	CHML	0.95303	0.874261
41	D5	35	CHML	0.967638	0.888605
41	D5	36	CHML	0.980522	0.901223
41	D5	37	CHML	0.99096	0.911396
41	D5	38	CHML	0.999684	0.919856
41	D5	39	CHML	1.00198	0.921889
41	D5	40	CHML	0.998857	0.918498
42	D6	1	CHML	0.111493	0.00681098
42	D6	2	CHML	0.110802	0.00593855
42	D6	3	CHML	0.108838	0.00379393
42	D6	4	CHML	0.106085	0.000859609
42	D6	5	CHML	0.105102	-0.00030369
42	D6	6	CHML	0.106141	0.000553674
42	D6	7	CHML	0.108125	0.00235704
42	D6	8	CHML	0.107543	0.00159359
42	D6	9	CHML	0.10601	-0.000119727
42	D6	10	CHML	0.102491	-0.00382009
42	D6	11	CHML	0.102365	-0.00412698
42	D6	12	CHML	0.105132	-0.00154114
42	D6	13	CHML	0.105805	-0.00104942
42	D6	14	CHML	0.107246	0.000210778
42	D6	15	CHML	0.106571	-0.00064561
42	D6	16	CHML	0.104017	-0.00337998
42	D6	17	CHML	0.103853	-0.00372517
42	D6	18	CHML	0.106572	-0.0011877
42	D6	19	CHML	0.108831	0.000890462
42	D6	20	CHML	0.11103	0.00290871
42	D6	21	CHML	0.115034	0.00673172
42	D6	22	CHML	0.120983	0.0124995
42	D6	23	CHML	0.134523	0.0258589
42	D6	24	CHML	0.163992	0.0551468
42	D6	25	CHML	0.21592	0.106893
42	D6	26	CHML	0.302741	0.193534
42	D6	27	CHML	0.428902	0.319513
42	D6	28	CHML	0.575938	0.466368
42	D6	29	CHML	0.714209	0.604459
42	D6	30	CHML	0.811106	0.701175
42	D6	31	CHML	0.876072	0.765959
42	D6	32	CHML	0.920601	0.810307
42	D6	33	CHML	0.954938	0.844463
42	D6	34	CHML	0.975402	0.864746
42	D6	35	CHML	0.991926	0.881089
42	D6	36	CHML	1.00151	0.890491
42	D6	37	CHML	1.00916	0.897957
42	D6	38	CHML	1.01358	0.902203
42	D6	39	CHML	1.02018	0.908624
42	D6	40	CHML	1.02774	0.915995
43	D7	1	CHML	0.739371	0.00721943
43	D7	2	CHML	0.737796	0.00728611
43	D7	3	CHML	0.733078	0.00420996
43	D7	4	CHML	0.72806	0.000833519
43	D7	5	CHML	0.725383	-0.000201352
43	D7	6	CHML	0.724431	0.000488378
43	D7	7	CHML	0.722987	0.000686787
43	D7	8	CHML	0.719905	-0.000753634
43	D7	9	CHML	0.717366	-0.00165028
43	D7	10	CHML	0.71671	-0.000664853
43	D7	11	CHML	0.713413	-0.00231949
43	D7	12	CHML	0.711963	-0.00212758
43	D7	13	CHML	0.71085	-0.00159926
43	D7	14	CHML	0.709119	-0.00168803
43	D7	15	CHML	0.708348	-0.000817278
43	D7	16	CHML	0.707996	0.000472492
43	D7	17	CHML	0.70541	-0.000471125
43	D7	18	CHML	0.704523	0.000283455
43	D7	19	CHML	0.703993	0.00139566
43	D7	20	CHML	0.701939	0.000983362
43	D7	21	CHML	0.702253	0.00293927
43	D7	22	CHML	0.708501	0.0108297
43	D7	23	CHML	0.722472	0.0264419
43	D7	24	CHML	0.746962	0.0525747
43	D7	25	CHML	0.786417	0.093671
43	D7	26	CHML	0.854965	0.163861
43	D7	27	CHML	0.962323	0.272862
43	D7	28	CHML	1.09666	0.408838
43	D7	29	CHML	1.22986	0.543684
43	D7	30	CHML	1.33066	0.646129
43	D7	31	CHML	1.39694	0.71405
43	D7	32	CHML	1.4394	0.758149
43	D7	33	CHML	1.46936	0.789745
43	D7	34	CHML	1.49035	0.812377
43	D7	35	CHML	1.50492	0.828597
43	D7	36	CHML	1.51279	0.838109
43	D7	37	CHML	1.52086	0.847818
43	D7	38	CHML	1.52995	0.858553
43	D7	39	CHML	1.53318	0.863419
43	D7	40	CHML	1.5339	0.865779
44	D8	1	CHML	0.118012	0.006482
44	D8	2	CHML	0.11717	0.00534331
44	D8	3	CHML	0.11431	0.00218703
44	D8	4	CHML	0.112565	0.000144737
44	D8	5	CHML	0.112588	-0.000128585
44	D8	6	CHML	0.114803	0.00178943
44	D8	7	CHML	0.114465	0.00115411
44	D8	8	CHML	0.114045	0.000437624
44	D8	9	CHML	0.113977	7.25266e-05
44	D8	10	CHML	0.111603	-0.00259834
44	D8	11	CHML	0.111798	-0.00269949
44	D8	12	CHML	0.114839	4.43133e-05
44	D8	13	CHML	0.115216	0.000124567
44	D8	14	CHML	0.114853	-0.000535596
44	D8	15	CHML	0.113934	-0.00175084
44	D8	16	CHML	0.113657	-0.0023243
44	D8	17	CHML	0.114409	-0.0018692
44	D8	18	CHML	0.114845	-0.0017304
44	D8	19	CHML	0.117699	0.00082687
44	D8	20	CHML	0.118912	0.00174307
44	D8	21	CHML	0.122578	0.00511247
44	D8	22	CHML	0.127914	0.0101513
44	D8	23	CHML	0.141232	0.0231729
44	D8	24	CHML	0.165965	0.0476084
44	D8	25	CHML	0.209053	0.0903996
44	D8	26	CHML	0.284846	0.165896
44	D8	27	CHML	0.395634	0.276387
44	D8	28	CHML	0.531724	0.412181
44	D8	29	CHML	0.668911	0.54907
44	D8	30	CHML	0.768467	0.64833
44	D8	31	CHML	0.83442	0.713986
44	D8	32	CHML	0.876769	0.756038
44	D8	33	CHML	0.906873	0.785845
44	D8	34	CHML	0.929712	0.808387
44	D8	35	CHML	0.944813	0.823192
44	D8	36	CHML	0.955222	0.833304
44	D8	37	CHML	0.965462	0.843247
44	D8	38	CHML	0.972425	0.849913
44	D8	39	CHML	0.975521	0.852713
44	D8	40	CHML	0.976762	0.853657
45	D9	1	GAPD	0.314868	0.00211317
45	D9	2	GAPD	0.314677	0.00201215
45	D9	3	GAPD	0.314115	0.00154086
45	D9	4	GAPD	0.313274	0.000790297
45	D9	5	GAPD	0.312602	0.000208266
45	D9	6	GAPD	0.312515	0.000211702
45	D9	7	GAPD	0.312336	0.00012287
45	D9	8	GAPD	0.310352	-0.00177055
45	D9	9	GAPD	0.30986	-0.00217213
45	D9	10	GAPD	0.309939	-0.00200243
45	D9	11	GAPD	0.310696	-0.00115565
45	D9	12	GAPD	0.312954	0.00119329
45	D9	13	GAPD	0.312964	0.0012935
45	D9	14	GAPD	0.31332	0.00173997
45	D9	15	GAPD	0.317809	0.00631929
45	D9	16	GAPD	0.326983	0.0155833
45	D9	17	GAPD	0.336555	0.0252452
45	D9	18	GAPD	0.357482	0.0462625
45	D9	19	GAPD	0.39193	0.0808016
45	D9	20	GAPD	0.451155	0.140117
45	D9	21	GAPD	0.52764	0.216692
45	D9	22	GAPD	0.613251	0.302393
45	D9	23	GAPD	0.691667	0.3809
45	D9	24	GAPD	0.754241	0.443565
45	D9	25	GAPD	0.804015	0.493429
45	D9	26	GAPD	0.846084	0.535587
45	D9	27	GAPD	0.876235	0.565829
45	D9	28	GAPD	0.899325	0.589009
45	D9	29	GAPD	0.912493	0.602268
45	D9	30	GAPD	0.926853	0.616718
45	D9	31	GAPD	0.937906	0.627862
45	D9	32	GAPD	0.941799	0.631845
45	D9	33	GAPD	0.950433	0.640569
45	D9	34	GAPD	0.956422	0.646648
45	D9	35	GAPD	0.955914	0.646231
45	D9	36	GAPD	0.958295	0.648702
45	D9	37	GAPD	0.96183	0.652328
45	D9	38	GAPD	0.962031	0.652619
45	D9	39	GAPD	0.961348	0.652026
45	D9	40	GAPD	0.962889	0.653658
46	D10	1
46	D10	2
46	D10	3
46	D10	4
46	D10	5
46	D10	6
46	D10	7
46	D10	8
46	D10	9
46	D10	10
46	D10	11
46	D10	12
46	D10	13
46	D10	14
46	D10	15
46	D10	16
46	D10	17
46	D10	18
46	D10	19
46	D10	20
46	D10	21
46	D10	22
46	D10	23
46	D10	24
46	D10	25
46	D10	26
46	D10	27
46	D10	28
46	D10	29
46	D10	30
46	D10	31
46	D10	32
46	D10	33
46	D10	34
46	D10	35
46	D10	36
46	D10	37
46	D10	38
46	D10	39
46	D10	40
47	D11	1
47	D11	2
47	D11	3
47	D11	4
47	D11	5
47	D11	6
47	D11	7
47	D11	8
47	D11	9
47	D11	10
47	D11	11
47	D11	12
47	D11	13
47	D11	14
47	D11	15
47	D11	16
47	D11	17
47	D11	18
47	D11	19
47	D11	20
47	D11	21
47	D11	22
47	D11	23
47	D11	24
47	D11	25
47	D11	26
47	D11	27
47	D11	28
47	D11	29
47	D11	30
47	D11	31
47	D11	32
47	D11	33
47	D11	34
47	D11	35
47	D11	36
47	D11	37
47	D11	38
47	D11	39
47	D11	40
48	D12	1
48	D12	2
48	D12	3
48	D12	4
48	D12	5
48	D12	6
48	D12	7
48	D12	8
48	D12	9
48	D12	10
48	D12	11
48	D12	12
48	D12	13
48	D12	14
48	D12	15
48	D12	16
48	D12	17
48	D12	18
48	D12	19
48	D12	20
48	D12	21
48	D12	22
48	D12	23
48	D12	24
48	D12	25
48	D12	26
48	D12	27
48	D12	28
48	D12	29
48	D12	30
48	D12	31
48	D12	32
48	D12	33
48	D12	34
48	D12	35
48	D12	36
48	D12	37
48	D12	38
48	D12	39
48	D12	40
49	E1	1	COL5A3	0.123091	0.00281183
49	E1	2	COL5A3	0.122907	0.00201177
49	E1	3	COL5A3	0.122183	0.000670819
49	E1	4	COL5A3	0.122023	-0.000106237
49	E1	5	COL5A3	0.122002	-0.000743566
49	E1	6	COL5A3	0.122129	-0.00123318
49	E1	7	COL5A3	0.122932	-0.00104775
49	E1	8	COL5A3	0.12301	-0.00158639
49	E1	9	COL5A3	0.123395	-0.00181781
49	E1	10	COL5A3	0.126555	0.000725906
49	E1	11	COL5A3	0.127221	0.000775156
49	E1	12	COL5A3	0.129448	0.00238541
49	E1	13	COL5A3	0.130202	0.00252232
49	E1	14	COL5A3	0.13079	0.00249402
49	E1	15	COL5A3	0.130523	0.00161022
49	E1	16	COL5A3	0.130165	0.000634587
49	E1	17	COL5A3	0.131263	0.00111657
49	E1	18	COL5A3	0.130856	9.26052e-05
49	E1	19	COL5A3	0.13037	-0.00100983
49	E1	20	COL5A3	0.127687	-0.00430943
49	E1	21	COL5A3	0.127963	-0.00465098
49	E1	22	COL5A3	0.134295	0.00106479
49	E1	23	COL5A3	0.135749	0.00190138
49	E1	24	COL5A3	0.134335	-0.000129278
49	E1	25	COL5A3	0.133904	-0.00117693
49	E1	26	COL5A3	0.137515	0.00181759
49	E1	27	COL5A3	0.144131	0.00781688
49	E1	28	COL5A3	0.157765	0.020834
49	E1	29	COL5A3	0.182334	0.0447862
49	E1	30	COL5A3	0.227022	0.0888575
49	E1	31	COL5A3	0.306072	0.167291
49	E1	32	COL5A3	0.418366	0.278968
49	E1	33	COL5A3	0.562687	0.422673
[truncated: 1,887 more rows]

## Sheet: Results
Block Type	96-Well 0.2-mL Block
Calibration Background is expired	Yes
Calibration Background performed on	06-16-2022
Calibration Pure Dye ABY is expired	Yes
Calibration Pure Dye ABY performed on	06-16-2022
Calibration Pure Dye CY5 is expired	Yes
Calibration Pure Dye CY5 performed on	06-16-2022
Calibration Pure Dye FAM is expired	Yes
Calibration Pure Dye FAM performed on	06-16-2022
Calibration Pure Dye JUN is expired	Yes
Calibration Pure Dye JUN performed on	06-16-2022
Calibration Pure Dye MUSTANG PURPLE is expired	Yes
Calibration Pure Dye MUSTANG PURPLE performed on	06-16-2022
Calibration Pure Dye NED is expired	Yes
Calibration Pure Dye NED performed on	06-16-2022
Calibration Pure Dye ROX is expired	Yes
Calibration Pure Dye ROX performed on	06-16-2022
Calibration Pure Dye SYBR is expired	Yes
Calibration Pure Dye SYBR performed on	06-16-2022
Calibration Pure Dye TAMRA is expired	Yes
Calibration Pure Dye TAMRA performed on	06-16-2022
Calibration Pure Dye VIC is expired	Yes
Calibration Pure Dye VIC performed on	06-16-2022
Calibration ROI is expired	Yes
Calibration ROI performed on	06-16-2022
Calibration Uniformity is expired	Yes
Calibration Uniformity performed on	06-16-2022
Chemistry	SYBR_GREEN
Date Created	2024-09-07 20:45:28 PM CST
Experiment Barcode
Experiment Comment
Experiment File Name	D:\SQF\2024-09-07_SQF_qPCR_.eds
Experiment Name	2024-09-07_SQF_qPCR_
Experiment Run End Time	2024-09-07 20:42:23 PM CST
Experiment Type	Standard Curve
Instrument Name	2765222065148
Instrument Serial Number	2765222065148
Instrument Type	QuantStudio™ 5 System
Passive Reference	ROX
Post-read Stage/Step
Pre-read Stage/Step
Quantification Cycle Method	Ct
Signal Smoothing On	true
Stage where Melt Analysis is performed	Stage3
Stage/ Cycle where Ct Analysis is performed	Stage2, Step2
User Name
Well	Well Position	Omit	Sample Name	Target Name	Task	Reporter	Quencher	CT	Ct Mean	Ct SD	Quantity	Quantity Mean	Quantity SD	Y-Intercept	R(superscript 2)	Slope	Efficiency	Automatic Ct Threshold	Ct Threshold	Automatic Baseline	Baseline Start	Baseline End	Amp Status	Comments	Cq Conf	CQCONF	HIGHSD	MTP	Tm1	Tm2	Tm3	Tm4
1	A1	FALSE	10A	GAPD	UNKNOWN	SYBR	None	18.1515	18.1536	0.421021								TRUE	0.0406833	TRUE	3	15	Amp		0.971064	N	N	N	86.975
2	A2	FALSE	10A	GAPD	UNKNOWN	SYBR	None	17.794	18.1536	0.421021								TRUE	0.0406833	TRUE	3	15	Amp		0.954377	N	N	N	86.975
3	A3	FALSE	10A	GAPD	UNKNOWN	SYBR	None	17.7163	18.1536	0.421021								TRUE	0.0406833	TRUE	3	15	Amp		0.957339	N	N	N	87.1243
4	A4	FALSE	10A	GAPD	UNKNOWN	SYBR	None	18.0372	18.1536	0.421021								TRUE	0.0406833	TRUE	3	15	Amp		0.972037	N	N	N	87.1243
5	A5	FALSE	231	GAPD	UNKNOWN	SYBR	None	18.4849	18.7635	0.265844								TRUE	0.0406833	TRUE	3	15	Amp		0.983076	N	N	N	86.9846
6	A6	FALSE	231	GAPD	UNKNOWN	SYBR	None	18.6065	18.7635	0.265844								TRUE	0.0406833	TRUE	3	15	Amp		0.972153	N	N	N	86.9846
7	A7	FALSE	231	GAPD	UNKNOWN	SYBR	None	18.7277	18.7635	0.265844								TRUE	0.0406833	TRUE	3	15	Amp		0.983501	N	N	N	86.9765
8	A8	FALSE	231	GAPD	UNKNOWN	SYBR	None	19.2447	18.7635	0.265844								TRUE	0.0406833	TRUE	3	16	Amp		0.955481	N	N	N	86.9765
9	A9	FALSE	10A	GAPD	UNKNOWN	SYBR	None	18.1979	18.1536	0.421021								TRUE	0.0406833	TRUE	3	15	Amp		0.984332	N	N	N	86.8308
13	B1	FALSE	10A	SCARB1	UNKNOWN	SYBR	None	25.2465	25.1027	0.379991								TRUE	0.103464	TRUE	3	20	Amp		0.984429	N	N	N	82.677
14	B2	FALSE	10A	SCARB1	UNKNOWN	SYBR	None	25.5205	25.1027	0.379991								TRUE	0.103464	TRUE	3	21	Amp		0.981364	N	N	N	82.677
15	B3	FALSE	10A	SCARB1	UNKNOWN	SYBR	None	25.022	25.1027	0.379991								TRUE	0.103464	TRUE	3	20	Amp		0.977917	N	N	N	82.8261
16	B4	FALSE	10A	SCARB1	UNKNOWN	SYBR	None	24.6216	25.1027	0.379991								TRUE	0.103464	TRUE	3	20	Amp		0.987539	N	N	N	82.8261
17	B5	FALSE	231	SCARB1	UNKNOWN	SYBR	None	23.2857	23.4442	0.181877								TRUE	0.103464	TRUE	3	19	Amp		0.979534	N	N	N	82.6851
18	B6	FALSE	231	SCARB1	UNKNOWN	SYBR	None	23.3034	23.4442	0.181877								TRUE	0.103464	TRUE	3	19	Amp		0.981982	N	N	N	82.6851
19	B7	FALSE	231	SCARB1	UNKNOWN	SYBR	None	23.5254	23.4442	0.181877								TRUE	0.103464	TRUE	3	19	Amp		0.984613	N	N	N	82.8265
20	B8	FALSE	231	SCARB1	UNKNOWN	SYBR	None	23.6626	23.4442	0.181877								TRUE	0.103464	TRUE	3	19	Amp		0.987129	N	N	N	82.8265
21	B9	FALSE	10A	GAPD	UNKNOWN	SYBR	None	18.9059	18.1536	0.421021								TRUE	0.0406833	TRUE	3	16	Amp		0.982117	N	N	N	86.6826
25	C1	FALSE	10A	SEPTIN3	UNKNOWN	SYBR	None	31.6309	31.8465	0.230393								TRUE	0.0937131	TRUE	3	28	Amp		0.981846	N	N	Y	76.7488	85.9376
26	C2	FALSE	10A	SEPTIN3	UNKNOWN	SYBR	None	31.6777	31.8465	0.230393								TRUE	0.0937131	TRUE	3	27	Amp		0.972689	N	N	Y	83.7145	79.8611
27	C3	FALSE	10A	SEPTIN3	UNKNOWN	SYBR	None	32.1105	31.8465	0.230393								TRUE	0.0937131	TRUE	3	28	Amp		0.967852	N	N	N	78.2314
28	C4	FALSE	10A	SEPTIN3	UNKNOWN	SYBR	None	31.967	31.8465	0.230393								TRUE	0.0937131	TRUE	3	28	Amp		0.984471	N	N	Y	86.0868	78.2314
29	C5	FALSE	231	SEPTIN3	UNKNOWN	SYBR	None	32.0353	32.5279	0.401511								TRUE	0.0937131	TRUE	3	28	Amp		0.983018	N	N	Y	76.4582	86.095
30	C6	FALSE	231	SEPTIN3	UNKNOWN	SYBR	None	33.0144	32.5279	0.401511								TRUE	0.0937131	TRUE	3	29	Amp		0.981311	N	N	Y	82.092	76.0134	86.095
31	C7	FALSE	231	SEPTIN3	UNKNOWN	SYBR	None	32.4845	32.5279	0.401511								TRUE	0.0937131	TRUE	3	28	Amp		0.975662	N	N	Y	86.0872	78.0836	82.6783
32	C8	FALSE	231	SEPTIN3	UNKNOWN	SYBR	None	32.5776	32.5279	0.401511								TRUE	0.0937131	TRUE	3	28	Amp		0.984812	N	N	Y	76.305	86.0872	83.2711
33	C9	FALSE	10A	GAPD	UNKNOWN	SYBR	None	18.6202	18.1536	0.421021								TRUE	0.0406833	TRUE	3	15	Amp		0.986122	N	N	N	86.6826
37	D1	FALSE	10A	CHML	UNKNOWN	SYBR	None	25.4392	26.2134	0.599048								TRUE	0.0848587	TRUE	3	21	Amp		0.968254	N	Y	N	80.4539
38	D2	FALSE	10A	CHML	UNKNOWN	SYBR	None	26.6104	26.2134	0.599048								TRUE	0.0848587	TRUE	3	22	Amp		0.963837	N	Y	N	80.6021
39	D3	FALSE	10A	CHML	UNKNOWN	SYBR	None	26.0497	26.2134	0.599048								TRUE	0.0848587	TRUE	3	22	Amp		0.977819	N	Y	N	80.751
40	D4	FALSE	10A	CHML	UNKNOWN	SYBR	None	26.7544	26.2134	0.599048								TRUE	0.0848587	TRUE	3	22	Amp		0.987338	N	Y	N	80.6028
41	D5	FALSE	231	CHML	UNKNOWN	SYBR	None	24.6152	24.7389	0.134319								TRUE	0.0848587	TRUE	3	21	Amp		0.985576	N	N	N	80.4612
42	D6	FALSE	231	CHML	UNKNOWN	SYBR	None	24.6332	24.7389	0.134319								TRUE	0.0848587	TRUE	3	21	Amp		0.979041	N	N	N	80.6095
43	D7	FALSE	231	CHML	UNKNOWN	SYBR	None	24.8272	24.7389	0.134319								TRUE	0.0848587	TRUE	3	21	Amp		0.979575	N	N	N	80.6032
44	D8	FALSE	231	CHML	UNKNOWN	SYBR	None	24.8798	24.7389	0.134319								TRUE	0.0848587	TRUE	3	21	Amp		0.981228	N	N	N	80.6032
45	D9	FALSE	10A	GAPD	UNKNOWN	SYBR	None	17.8058	18.1536	0.421021								TRUE	0.0406833	TRUE	3	14	Amp		0.981018	N	N	N	86.5343
49	E1	FALSE	10A	COL5A3	UNKNOWN	SYBR	None	30.0803	30.2147	0.24829								TRUE	0.0970019	TRUE	3	26	Amp		0.983664	N	N	N	83.7145
50	E2	FALSE	10A	COL5A3	UNKNOWN	SYBR	None	30.4692	30.2147	0.24829								TRUE	0.0970019	TRUE	3	27	Amp		0.984235	N	N	Y	83.7145	75.4149
51	E3	FALSE	10A	COL5A3	UNKNOWN	SYBR	None	29.9368	30.2147	0.24829								TRUE	0.0970019	TRUE	3	26	Amp		0.975256	N	N	Y	83.8636	75.7117
52	E4	FALSE	10A	COL5A3	UNKNOWN	SYBR	None	30.3725	30.2147	0.24829								TRUE	0.0970019	TRUE	3	26	Amp		0.987581	N	N	Y	83.8636	75.7117
53	E5	FALSE	231	COL5A3	UNKNOWN	SYBR	None	31.6286	31.8762	0.177255								TRUE	0.0970019	TRUE	3	27	Amp		0.984748	N	N	N	76.4582
54	E6	FALSE	231	COL5A3	UNKNOWN	SYBR	None	31.8821	31.8762	0.177255								TRUE	0.0970019	TRUE	3	27	Amp		0.986278	N	N	Y	76.7547	66.5249	61.0393	87.5776
55	E7	FALSE	231	COL5A3	UNKNOWN	SYBR	None	31.9537	31.8762	0.177255								TRUE	0.0970019	TRUE	3	27	Amp		0.984985	N	N	N	76.4532
56	E8	FALSE	231	COL5A3	UNKNOWN	SYBR	None	32.0403	31.8762	0.177255								TRUE	0.0970019	TRUE	3	27	Amp		0.975528	N	N	N	78.2318
57	E9	FALSE	231	GAPD	UNKNOWN	SYBR	None	18.4195	18.7635	0.265844								TRUE	0.0406833	TRUE	3	15	Amp		0.975676	N	N	N	86.5343
61	F1	FALSE	10A	SYNM	UNKNOWN	SYBR	None	31.737	30.9498	0.975914								TRUE	0.0869151	TRUE	3	27	Amp		0.984816	N	Y	N	79.5647
62	F2	FALSE	10A	SYNM	UNKNOWN	SYBR	None	30.2005	30.9498	0.975914								TRUE	0.0869151	TRUE	3	26	Amp		0.976621	N	Y	N	79.8611
63	F3	FALSE	10A	SYNM	UNKNOWN	SYBR	None	31.8461	30.9498	0.975914								TRUE	0.0869151	TRUE	3	28	Amp		0.9297	N	Y	N	79.1207
64	F4	FALSE	10A	SYNM	UNKNOWN	SYBR	None	30.0156	30.9498	0.975914								TRUE	0.0869151	TRUE	3	26	Amp		0.986782	N	Y	Y	78.9725	83.7153
65	F5	FALSE	231	SYNM	UNKNOWN	SYBR	None	28.4126	28.4804	0.198716								TRUE	0.0869151	TRUE	3	24	Amp		0.982618	N	N	N	78.9786
66	F6	FALSE	231	SYNM	UNKNOWN	SYBR	None	28.503	28.4804	0.198716								TRUE	0.0869151	TRUE	3	24	Amp		0.982771	N	N	N	78.9786
67	F7	FALSE	231	SYNM	UNKNOWN	SYBR	None	28.266	28.4804	0.198716								TRUE	0.0869151	TRUE	3	24	Amp		0.987563	N	N	N	78.9729
68	F8	FALSE	231	SYNM	UNKNOWN	SYBR	None	28.74	28.4804	0.198716								TRUE	0.0869151	TRUE	3	25	Amp		0.977768	N	N	N	78.8247
69	F9	FALSE	231	GAPD	UNKNOWN	SYBR	None	18.9092	18.7635	0.265844								TRUE	0.0406833	TRUE	3	16	Amp		0.969693	N	N	N	86.5343
73	G1	FALSE	10A	STAB1	UNKNOWN	SYBR	None	35.0834	34.1116	0.800862								TRUE	0.0611711	TRUE	3	31	Amp		0.978605	N	Y	Y	77.1934	83.7145
74	G2	FALSE	10A	STAB1	UNKNOWN	SYBR	None	33.3552	34.1116	0.800862								TRUE	0.0611711	TRUE	3	29	Amp		0.982142	N	Y	Y	82.8252	76.897
75	G3	FALSE	10A	STAB1	UNKNOWN	SYBR	None	34.4424	34.1116	0.800862								TRUE	0.0611711	TRUE	3	31	Amp		0.980364	N	Y	Y	80.6028	65.7813
76	G4	FALSE	10A	STAB1	UNKNOWN	SYBR	None	33.5656	34.1116	0.800862								TRUE	0.0611711	TRUE	3	30	Amp		0.988356	N	Y	Y	77.6385	82.3814
77	G5	FALSE	231	STAB1	UNKNOWN	SYBR	None	35.3554	34.7927	0.961261								TRUE	0.0611711	TRUE	3	31	Amp		0.747454	Y	Y	N	78.9786
78	G6	FALSE	231	STAB1	UNKNOWN	SYBR	None	33.4828	34.7927	0.961261								TRUE	0.0611711	TRUE	3	29	Amp		0.976701	N	Y	N	85.2055
79	G7	FALSE	231	STAB1	UNKNOWN	SYBR	None	34.6867	34.7927	0.961261								TRUE	0.0611711	TRUE	3	31	Amp		0.979764	N	Y	Y	77.3425	82.8265
80	G8	FALSE	231	STAB1	UNKNOWN	SYBR	None	35.6461	34.7927	0.961261								TRUE	0.0611711	TRUE	3	32	Amp		0.970211	N	Y	Y	77.1943	88.3105
81	G9	FALSE	231	GAPD	UNKNOWN	SYBR	None	18.8239	18.7635	0.265844								TRUE	0.0406833	TRUE	3	15	Amp		0.975854	N	N	N	86.6826
85	H1	FALSE	10A	PINK1	UNKNOWN	SYBR	None	26.9842	26.9466	0.0728217								TRUE	0.0554402	TRUE	3	24	Amp		0.981843	N	N	Y	91.8659	80.6021
86	H2	FALSE	10A	PINK1	UNKNOWN	SYBR	None	26.8487	26.9466	0.0728217								TRUE	0.0554402	TRUE	3	23	Amp		0.975564	N	N	Y	91.8659	80.8986
87	H3	FALSE	10A	PINK1	UNKNOWN	SYBR	None	27.0161	26.9466	0.0728217								TRUE	0.0554402	TRUE	3	23	Amp		0.986519	N	N	N	92.0154
88	H4	FALSE	10A	PINK1	UNKNOWN	SYBR	None	26.9373	26.9466	0.0728217								TRUE	0.0554402	TRUE	3	24	Amp		0.927253	N	N	Y	92.0154	80.1582
89	H5	FALSE	231	PINK1	UNKNOWN	SYBR	None	24.4504	24.516	0.107009								TRUE	0.0554402	TRUE	3	20	Amp		0.994148	N	N	N	92.0254
90	H6	FALSE	231	PINK1	UNKNOWN	SYBR	None	24.5874	24.516	0.107009								TRUE	0.0554402	TRUE	3	21	Amp		0.990176	N	N	N	92.0254
91	H7	FALSE	231	PINK1	UNKNOWN	SYBR	None	24.6248	24.516	0.107009								TRUE	0.0554402	TRUE	3	21	Amp		0.946095	N	N	Y	91.7195	80.1586
92	H8	FALSE	231	PINK1	UNKNOWN	SYBR	None	24.4015	24.516	0.107009								TRUE	0.0554402	TRUE	3	21	Amp		0.989305	N	N	N	91.7195
93	H9	FALSE	231	GAPD	UNKNOWN	SYBR	None	18.8916	18.7635	0.265844								TRUE	0.0406833	TRUE	3	16	Amp		0.983286	N	N	N	86.8308

## Sheet: Melt Curve Raw Data
Block Type	96-Well 0.2-mL Block
Calibration Background is expired	Yes
Calibration Background performed on	06-16-2022
Calibration Pure Dye ABY is expired	Yes
Calibration Pure Dye ABY performed on	06-16-2022
Calibration Pure Dye CY5 is expired	Yes
Calibration Pure Dye CY5 performed on	06-16-2022
Calibration Pure Dye FAM is expired	Yes
Calibration Pure Dye FAM performed on	06-16-2022
Calibration Pure Dye JUN is expired	Yes
Calibration Pure Dye JUN performed on	06-16-2022
Calibration Pure Dye MUSTANG PURPLE is expired	Yes
Calibration Pure Dye MUSTANG PURPLE performed on	06-16-2022
Calibration Pure Dye NED is expired	Yes
Calibration Pure Dye NED performed on	06-16-2022
Calibration Pure Dye ROX is expired	Yes
Calibration Pure Dye ROX performed on	06-16-2022
Calibration Pure Dye SYBR is expired	Yes
Calibration Pure Dye SYBR performed on	06-16-2022
Calibration Pure Dye TAMRA is expired	Yes
Calibration Pure Dye TAMRA performed on	06-16-2022
Calibration Pure Dye VIC is expired	Yes
Calibration Pure Dye VIC performed on	06-16-2022
Calibration ROI is expired	Yes
Calibration ROI performed on	06-16-2022
Calibration Uniformity is expired	Yes
Calibration Uniformity performed on	06-16-2022
Chemistry	SYBR_GREEN
Date Created	2024-09-07 20:45:28 PM CST
Experiment Barcode
Experiment Comment
Experiment File Name	D:\SQF\2024-09-07_SQF_qPCR_.eds
Experiment Name	2024-09-07_SQF_qPCR_
Experiment Run End Time	2024-09-07 20:42:23 PM CST
Experiment Type	Standard Curve
Instrument Name	2765222065148
Instrument Serial Number	2765222065148
Instrument Type	QuantStudio™ 5 System
Passive Reference	ROX
Post-read Stage/Step
Pre-read Stage/Step
Quantification Cycle Method	Ct
Signal Smoothing On	true
Stage where Melt Analysis is performed	Stage3
Stage/ Cycle where Ct Analysis is performed	Stage2, Step2
User Name
Well	Well Position	Reading	Temperature	Fluorescence	Derivative	Target Name
1	A1	1	60.0014	123379	2268.62	GAPD
1	A1	2	60.2978	123172	2306.88	GAPD
1	A1	3	60.5942	122535	2370.94	GAPD
1	A1	4	60.8906	122439	2460.21	GAPD
1	A1	5	61.1871	121212	2564.88	GAPD
1	A1	6	61.4835	121069	2614.17	GAPD
1	A1	7	61.7799	119942	2651.23	GAPD
1	A1	8	62.0763	118612	2676.33	GAPD
1	A1	9	62.3727	117919	2688.11	GAPD
1	A1	10	62.6691	117308	2688.07	GAPD
1	A1	11	62.9655	116499	2679.71	GAPD
1	A1	12	63.2619	115276	2667.89	GAPD
1	A1	13	63.5584	114021	2658.24	GAPD
1	A1	14	63.8548	114027	2655.85	GAPD
1	A1	15	64.1512	113063	2663.63	GAPD
1	A1	16	64.4476	111916	2681.32	GAPD
1	A1	17	64.744	111467	2705.8	GAPD
1	A1	18	65.0404	110440	2732.55	GAPD
1	A1	19	65.3368	109360	2757.02	GAPD
1	A1	20	65.6333	108366	2775.25	GAPD
1	A1	21	65.9297	107681	2784.17	GAPD
1	A1	22	66.2261	107001	2782.38	GAPD
1	A1	23	66.5225	105342	2771.39	GAPD
1	A1	24	66.8189	104370	2756.3	GAPD
1	A1	25	67.1153	103689	2744.45	GAPD
1	A1	26	67.4117	103042	2741.94	GAPD
1	A1	27	67.7082	102244	2750.11	GAPD
1	A1	28	68.0046	101264	2764.34	GAPD
1	A1	29	68.301	100523	2776.39	GAPD
1	A1	30	68.5974	98988.4	2778.78	GAPD
1	A1	31	68.8938	98365.3	2768.71	GAPD
1	A1	32	69.1902	97025.6	2748.96	GAPD
1	A1	33	69.4866	96698.4	2725.93	GAPD
1	A1	34	69.7831	95408.2	2705.86	GAPD
1	A1	35	70.0795	95259	2691.88	GAPD
1	A1	36	70.3759	93908.8	2683.27	GAPD
1	A1	37	70.6723	92987.9	2676.71	GAPD
1	A1	38	70.9687	92233.3	2668.53	GAPD
1	A1	39	71.2651	91494.3	2656.47	GAPD
1	A1	40	71.5615	90411.2	2640.62	GAPD
1	A1	41	71.8579	89591.7	2623.07	GAPD
1	A1	42	72.1544	88775	2606.92	GAPD
1	A1	43	72.4508	88269.5	2594.79	GAPD
1	A1	44	72.7472	87439.3	2587.63	GAPD
1	A1	45	73.0436	86606.8	2584.44	GAPD
1	A1	46	73.34	85657.7	2583.03	GAPD
1	A1	47	73.6364	85085.4	2581.44	GAPD
1	A1	48	73.9328	84264	2579.03	GAPD
1	A1	49	74.2293	83187.9	2576.55	GAPD
1	A1	50	74.5257	82504.8	2575.14	GAPD
1	A1	51	74.8221	82033.9	2574.91	GAPD
1	A1	52	75.1185	81526.5	2574.44	GAPD
1	A1	53	75.4149	79843.4	2569.06	GAPD
1	A1	54	75.7113	79354.5	2554.07	GAPD
1	A1	55	76.0077	78780.7	2533.14	GAPD
1	A1	56	76.3042	77957.7	2512.75	GAPD
1	A1	57	76.6006	77207.5	2499.87	GAPD
1	A1	58	76.897	76375.3	2498.22	GAPD
1	A1	59	77.1934	75796.5	2506.7	GAPD
1	A1	60	77.4898	74668	2520	GAPD
1	A1	61	77.7862	73999.5	2530.19	GAPD
1	A1	62	78.0826	73696.7	2528.61	GAPD
1	A1	63	78.379	72309.9	2508.15	GAPD
1	A1	64	78.6755	71418.5	2465.56	GAPD
1	A1	65	78.9719	71047	2402.94	GAPD
1	A1	66	79.2683	70324.4	2327.28	GAPD
1	A1	67	79.5647	69469.4	2248.76	GAPD
1	A1	68	79.8611	69019.4	2178.77	GAPD
1	A1	69	80.1575	68113.2	2128.43	GAPD
1	A1	70	80.4539	67766.8	2107.16	GAPD
1	A1	71	80.7504	67082.8	2119.92	GAPD
1	A1	72	81.0468	66716.1	2164.38	GAPD
1	A1	73	81.3432	65804.1	2229.61	GAPD
1	A1	74	81.6396	65282.4	2298.3	GAPD
1	A1	75	81.936	63928.5	2352.62	GAPD
1	A1	76	82.2324	63575.2	2380.68	GAPD
1	A1	77	82.5288	62888.5	2381.13	GAPD
1	A1	78	82.8252	61678.6	2363.81	GAPD
1	A1	79	83.1217	61241.6	2346.73	GAPD
1	A1	80	83.4181	60821.1	2351.02	GAPD
1	A1	81	83.7145	60160	2397.22	GAPD
1	A1	82	84.0109	59092.4	2506.84	GAPD
1	A1	83	84.3073	58815.3	2633.11	GAPD
1	A1	84	84.6037	57757.2	2790.17	GAPD
1	A1	85	84.9001	56984.2	3065.77	GAPD
1	A1	86	85.1966	55366.6	3530.98	GAPD
1	A1	87	85.493	54893.2	4258.53	GAPD
1	A1	88	85.7894	53944.1	5279.25	GAPD
1	A1	89	86.0858	51577.8	6528.8	GAPD
1	A1	90	86.3822	46817.3	7817.73	GAPD
1	A1	91	86.6786	34428.1	8860.21	GAPD
1	A1	92	86.975	17943	9368.5	GAPD
1	A1	93	87.2715	14253.8	9174.02	GAPD
1	A1	94	87.5679	14064.1	8306.73	GAPD
1	A1	95	87.8643	13093.1	6983.36	GAPD
1	A1	96	88.1607	13662.8	5511.73	GAPD
1	A1	97	88.4571	13037.6	4169.42	GAPD
1	A1	98	88.7535	13186.7	3121.82	GAPD
1	A1	99	89.0499	12828.5	2186.54	GAPD
1	A1	100	89.3463	12967.1	1183.15	GAPD
1	A1	101	89.6428	12490.8	650.18	GAPD
1	A1	102	89.9392	13074.2	399.995	GAPD
1	A1	103	90.2356	12321.5	294.952	GAPD
1	A1	104	90.532	12233	251	GAPD
1	A1	105	90.8284	11887.2	226.058	GAPD
1	A1	106	91.1248	12278.5	205.848	GAPD
1	A1	107	91.4212	12311.5	190.538	GAPD
1	A1	108	91.7177	11922.6	183.058	GAPD
1	A1	109	92.0141	11853.3	181.778	GAPD
1	A1	110	92.3105	11625.6	179.991	GAPD
1	A1	111	92.6069	11204.5	170.754	GAPD
1	A1	112	92.9033	11787	151.832	GAPD
1	A1	113	93.1997	11516.8	126.301	GAPD
1	A1	114	93.4961	11317.8	98.9448	GAPD
1	A1	115	93.7926	11219.6	72.5059	GAPD
1	A1	116	94.089	11045.2	47.147	GAPD
1	A1	117	94.3854	11138.3	22.5974	GAPD
1	A1	118	94.6818	11446	-0.0522461	GAPD
2	A2	1	60.0014	104860	2613.06	GAPD
2	A2	2	60.2978	104113	2618.23	GAPD
2	A2	3	60.5942	103080	2620.8	GAPD
2	A2	4	60.8906	102342	2617.89	GAPD
2	A2	5	61.1871	101079	2608.91	GAPD
2	A2	6	61.4835	100420	2596.03	GAPD
2	A2	7	61.7799	99444.2	2583.31	GAPD
2	A2	8	62.0763	98241.1	2574.92	GAPD
2	A2	9	62.3727	97565.1	2573.05	GAPD
2	A2	10	62.6691	96748.9	2576.71	GAPD
2	A2	11	62.9655	95858.4	2582.11	GAPD
2	A2	12	63.2619	95310.1	2584.65	GAPD
2	A2	13	63.5584	93158.7	2581.43	GAPD
2	A2	14	63.8548	92613.6	2572.49	GAPD
2	A2	15	64.1512	91746.2	2560.11	GAPD
2	A2	16	64.4476	91194.8	2546.9	GAPD
2	A2	17	64.744	89823.6	2534.31	GAPD
2	A2	18	65.0404	88976.8	2522.25	GAPD
2	A2	19	65.3368	88156	2509.85	GAPD
2	A2	20	65.6333	87239.9	2496.3	GAPD
2	A2	21	65.9297	86170.3	2481.47	GAPD
2	A2	22	66.2261	85947.1	2466.35	GAPD
2	A2	23	66.5225	84258.9	2452.98	GAPD
2	A2	24	66.8189	83405	2443.74	GAPD
2	A2	25	67.1153	83528.9	2440.07	GAPD
2	A2	26	67.4117	82050.4	2441.15	GAPD
2	A2	27	67.7082	81543.9	2443.83	GAPD
2	A2	28	68.0046	80477.4	2443.95	GAPD
2	A2	29	68.301	79627	2438.5	GAPD
2	A2	30	68.5974	78521.4	2427.19	GAPD
2	A2	31	68.8938	78149.2	2412.55	GAPD
2	A2	32	69.1902	76980.9	2398.48	GAPD
2	A2	33	69.4866	76513.4	2388.18	GAPD
2	A2	34	69.7831	75785.7	2382.48	GAPD
2	A2	35	70.0795	75080	2379.64	GAPD
2	A2	36	70.3759	74237.5	2376.58	GAPD
2	A2	37	70.6723	73247.7	2371.07	GAPD
2	A2	38	70.9687	72413.7	2363.46	GAPD
2	A2	39	71.2651	71850.8	2356.6	GAPD
2	A2	40	71.5615	70737.3	2353.19	GAPD
2	A2	41	71.8579	70610.5	2357.33	GAPD
2	A2	42	72.1544	70357.6	2364.66	GAPD
2	A2	43	72.4508	68602.4	2371.58	GAPD
2	A2	44	72.7472	67657.4	2373.51	GAPD
2	A2	45	73.0436	67335.6	2368.15	GAPD
2	A2	46	73.34	66739.3	2356.14	GAPD
2	A2	47	73.6364	65476.8	2310.89	GAPD
2	A2	48	73.9328	65048.9	2260.09	GAPD
2	A2	49	74.2293	64384.5	2214.41	GAPD
2	A2	50	74.5257	63578.3	2176.52	GAPD
2	A2	51	74.8221	63077.2	2145.03	GAPD
2	A2	52	75.1185	62342.4	2116.74	GAPD
2	A2	53	75.4149	61566.2	2089.77	GAPD
2	A2	54	75.7113	60623.7	2065.81	GAPD
2	A2	55	76.0077	60482.9	2050.05	GAPD
2	A2	56	76.3042	59805.3	2048.9	GAPD
2	A2	57	76.6006	58894.4	2066.34	GAPD
2	A2	58	76.897	58238.9	2100.98	GAPD
2	A2	59	77.1934	57886.1	2145.16	GAPD
2	A2	60	77.4898	56990.6	2186.66	GAPD
2	A2	61	77.7862	56174.1	2212.89	GAPD
2	A2	62	78.0826	55018	2215.95	GAPD
2	A2	63	78.379	54739.7	2195.73	GAPD
2	A2	64	78.6755	53935.9	2158.99	GAPD
2	A2	65	78.9719	53320.5	2115.17	GAPD
2	A2	66	79.2683	52937.2	2071.9	GAPD
2	A2	67	79.5647	51815.1	2033.05	GAPD
2	A2	68	79.8611	51340.5	1999.66	GAPD
2	A2	69	80.1575	50607	1971.53	GAPD
2	A2	70	80.4539	50440.8	1947.98	GAPD
2	A2	71	80.7504	49502.4	1927.9	GAPD
2	A2	72	81.0468	48844.3	1910.39	GAPD
2	A2	73	81.3432	47923	1896.09	GAPD
2	A2	74	81.6396	47815.8	1887.77	GAPD
2	A2	75	81.936	47345	1889.09	GAPD
2	A2	76	82.2324	46292.5	1902.35	GAPD
2	A2	77	82.5288	45814.9	1927.33	GAPD
2	A2	78	82.8252	45480.3	1962.42	GAPD
2	A2	79	83.1217	44194.4	2007.26	GAPD
2	A2	80	83.4181	44303.3	2065.66	GAPD
2	A2	81	83.7145	42812.5	2148.75	GAPD
2	A2	82	84.0109	42907	2280.16	GAPD
2	A2	83	84.3073	41841.1	2403.86	GAPD
2	A2	84	84.6037	41144.3	2535.77	GAPD
2	A2	85	84.9001	40369.1	2769.86	GAPD
2	A2	86	85.1966	39274.9	3162.9	GAPD
2	A2	87	85.493	38164.2	3766.13	GAPD
2	A2	88	85.7894	37421.6	4590.42	GAPD
2	A2	89	86.0858	34617.7	5567.73	GAPD
2	A2	90	86.3822	29254.7	6535.32	GAPD
2	A2	91	86.6786	13774.4	7267.69	GAPD
2	A2	92	86.975	-176.158	7555.62	GAPD
2	A2	93	87.2715	-2737.68	7296.76	GAPD
2	A2	94	87.5679	-3013.66	6545.1	GAPD
2	A2	95	87.8643	-3670.81	5487.74	GAPD
2	A2	96	88.1607	-2779.52	4363.37	GAPD
2	A2	97	88.4571	-3402.97	3371.21	GAPD
2	A2	98	88.7535	-3542.91	2617.67	GAPD
2	A2	99	89.0499	-3595.19	1621.2	GAPD
2	A2	100	89.3463	-3525.92	711.714	GAPD
2	A2	101	89.6428	-3488.29	237.678	GAPD
2	A2	102	89.9392	-3185.79	26.7744	GAPD
2	A2	103	90.2356	-3539.65	-41.5901	GAPD
2	A2	104	90.532	-3963.81	-42.3633	GAPD
2	A2	105	90.8284	-3600.42	-20.0198	GAPD
2	A2	106	91.1248	-3797.46	-0.179932	GAPD
2	A2	107	91.4212	-3778.99	4.30249	GAPD
2	A2	108	91.7177	-4451.34	-9.44482	GAPD
2	A2	109	92.0141	-4077.65	-36.2778	GAPD
2	A2	110	92.3105	-3912.93	-66.1069	GAPD
2	A2	111	92.6069	-3891.99	-88.7883	GAPD
2	A2	112	92.9033	-4197.06	-99.147	GAPD
2	A2	113	93.1997	-3960.77	-98.8914	GAPD
2	A2	114	93.4961	-4848.36	-93.8689	GAPD
2	A2	115	93.7926	-4024.06	-89.0564	GAPD
2	A2	116	94.089	-4039.62	-85.6433	GAPD
2	A2	117	94.3854	-4392.9	-82.2075	GAPD
2	A2	118	94.6818	-4594.96	-77.8696	GAPD
3	A3	1	60.0009	120780	2597.13	GAPD
3	A3	2	60.2973	120919	2618.9	GAPD
3	A3	3	60.5938	119223	2642.05	GAPD
3	A3	4	60.8902	119141	2660.84	GAPD
3	A3	5	61.1866	118464	2670.39	GAPD
3	A3	6	61.4831	116784	2669	GAPD
3	A3	7	61.7795	116081	2659.04	GAPD
3	A3	8	62.0759	115023	2645.86	GAPD
3	A3	9	62.3723	114764	2635.39	GAPD
3	A3	10	62.6688	113578	2632.1	GAPD
3	A3	11	62.9652	112572	2637.75	GAPD
3	A3	12	63.2616	111893	2651.1	GAPD
3	A3	13	63.5581	111002	2668.3	GAPD
3	A3	14	63.8545	110234	2683.74	GAPD
3	A3	15	64.1509	109169	2691.94	GAPD
3	A3	16	64.4474	108100	2689.62	GAPD
3	A3	17	64.7438	106814	2677.01	GAPD
3	A3	18	65.0402	106132	2657.47	GAPD
3	A3	19	65.3366	105485	2635.65	GAPD
3	A3	20	65.6331	104175	2615.18	GAPD
3	A3	21	65.9295	103660	2597.57	GAPD
3	A3	22	66.2259	102737	2582.6	GAPD
3	A3	23	66.5224	102040	2569.89	GAPD
3	A3	24	66.8188	100624	2560.06	GAPD
3	A3	25	67.1152	100084	2554.69	GAPD
3	A3	26	67.4117	99389.9	2554.8	GAPD
3	A3	27	67.7081	98730.1	2559.1	GAPD
3	A3	28	68.0045	97776.4	2563.78	GAPD
3	A3	29	68.301	96931.5	2564.13	GAPD
3	A3	30	68.5974	95507.6	2557.26	GAPD
3	A3	31	68.8938	95489.7	2544.01	GAPD
3	A3	32	69.1902	94069.6	2528.78	GAPD
3	A3	33	69.4867	93298.1	2517.31	GAPD
3	A3	34	69.7831	92884	2513.38	GAPD
3	A3	35	70.0795	92156.1	2516.56	GAPD
3	A3	36	70.376	91497.6	2522.33	GAPD
3	A3	37	70.6724	90355.6	2524.74	GAPD
3	A3	38	70.9688	89117.4	2519.8	GAPD
3	A3	39	71.2653	88417	2507.51	GAPD
3	A3	40	71.5617	88245.4	2491.09	GAPD
3	A3	41	71.8581	86904.4	2474.67	GAPD
3	A3	42	72.1546	86516.6	2461.19	GAPD
3	A3	43	72.451	85442.3	2451.71	GAPD
3	A3	44	72.7474	84981.7	2444.24	GAPD
3	A3	45	73.0438	84174.6	2438.56	GAPD
3	A3	46	73.3403	83165.2	2439.11	GAPD
3	A3	47	73.6367	82820	2443.38	GAPD
3	A3	48	73.9331	82068.1	2447.57	GAPD
3	A3	49	74.2296	80963.3	2447.93	GAPD
3	A3	50	74.526	80244.1	2443.38	GAPD
3	A3	51	74.8224	79591.1	2431.22	GAPD
3	A3	52	75.1189	78933.8	2413.12	GAPD
3	A3	53	75.4153	78202.5	2390.81	GAPD
3	A3	54	75.7117	77349.8	2366.54	GAPD
3	A3	55	76.0081	76305.1	2343.34	GAPD
3	A3	56	76.3046	76312.3	2324.72	GAPD
3	A3	57	76.601	75145	2313.61	GAPD
3	A3	58	76.8974	74475.5	2311.05	GAPD
3	A3	59	77.1939	73909.5	2316.19	GAPD
3	A3	60	77.4903	72699.3	2326.89	GAPD
3	A3	61	77.7867	72859.7	2340.47	GAPD
3	A3	62	78.0832	71039.9	2353.53	GAPD
3	A3	63	78.3796	71110	2361.28	GAPD
3	A3	64	78.676	70353	2357.7	GAPD
3	A3	65	78.9725	69384.2	2337.54	GAPD
3	A3	66	79.2689	68123.3	2299.5	GAPD
3	A3	67	79.5653	68074.5	2248.04	GAPD
3	A3	68	79.8617	67472.6	2192.28	GAPD
3	A3	69	80.1582	66342.8	2142.11	GAPD
3	A3	70	80.4546	66376.7	2104.11	GAPD
3	A3	71	80.751	65245	2079.73	GAPD
3	A3	72	81.0475	64589.5	2066.51	GAPD
3	A3	73	81.3439	64375.8	2060.8	GAPD
3	A3	74	81.6403	63479.1	2060.35	GAPD
3	A3	75	81.9368	62529.7	2065.55	GAPD
3	A3	76	82.2332	62274.9	2078.71	GAPD
3	A3	77	82.5296	61747.9	2102.25	GAPD
3	A3	78	82.8261	61013.8	2137.03	GAPD
3	A3	79	83.1225	60050.5	2182.52	GAPD
3	A3	80	83.4189	59635.7	2239.77	GAPD
3	A3	81	83.7153	58904.4	2316.38	GAPD
3	A3	82	84.0118	57835.9	2433.19	GAPD
3	A3	83	84.3082	57693.2	2524.44	GAPD
3	A3	84	84.6046	56669.8	2673.84	GAPD
3	A3	85	84.9011	56154	2940.59	GAPD
3	A3	86	85.1975	54724.7	3393	GAPD
3	A3	87	85.4939	53497.4	4099.8	GAPD
3	A3	88	85.7904	52762.5	5092.19	GAPD
3	A3	89	86.0868	50211.8	6314.48	GAPD
3	A3	90	86.3832	45816.3	7592.3	GAPD
3	A3	91	86.6797	33982.9	8653.25	GAPD
3	A3	92	86.9761	16129	9211.9	GAPD
3	A3	93	87.2725	11121.9	9087.06	GAPD
3	A3	94	87.5689	10951.2	8286.79	GAPD
3	A3	95	87.8654	10752.8	7008	GAPD
3	A3	96	88.1618	10916	5549.99	GAPD
3	A3	97	88.4582	10557.9	4194.44	GAPD
3	A3	98	88.7547	10406.7	3117.63	GAPD
3	A3	99	89.0511	10380.8	2259.38	GAPD
3	A3	100	89.3475	10201.8	1146.05	GAPD
3	A3	101	89.644	10149	528.512	GAPD
3	A3	102	89.9404	10560.6	221.611	GAPD
3	A3	103	90.2368	10004.5	92.5906	GAPD
3	A3	104	90.5332	10554.9	59.9397	GAPD
3	A3	105	90.8297	10321.1	74.46	GAPD
3	A3	106	91.1261	9670.92	103.145	GAPD
3	A3	107	91.4225	9728.78	123.059	GAPD
3	A3	108	91.719	9712.23	121.97	GAPD
3	A3	109	92.0154	9953.54	99.1357	GAPD
3	A3	110	92.3118	9478.16	62.4148	GAPD
3	A3	111	92.6083	9641.88	22.4368	GAPD
3	A3	112	92.9047	9660.14	-12.729	GAPD
3	A3	113	93.2011	9815.08	-39.8811	GAPD
3	A3	114	93.4976	9342.2	-59.7544	GAPD
3	A3	115	93.794	9407.77	-74.4985	GAPD
3	A3	116	94.0904	9730.15	-85.6228	GAPD
3	A3	117	94.3869	9862.22	-93.616	GAPD
3	A3	118	94.6833	9244.56	-98.959	GAPD
4	A4	1	60.0009	128281	2928.06	GAPD
4	A4	2	60.2973	127770	2912.54	GAPD
4	A4	3	60.5938	126870	2901.16	GAPD
4	A4	4	60.8902	125850	2892.34	GAPD
4	A4	5	61.1866	125457	2884.02	GAPD
4	A4	6	61.4831	124028	2873.91	GAPD
4	A4	7	61.7795	123056	2859.69	GAPD
4	A4	8	62.0759	122237	2839.22	GAPD
4	A4	9	62.3723	121306	2811.2	GAPD
4	A4	10	62.6688	120317	2776.23	GAPD
4	A4	11	62.9652	118920	2737.31	GAPD
4	A4	12	63.2616	118376	2699.32	GAPD
4	A4	13	63.5581	117420	2667.01	GAPD
4	A4	14	63.8545	116626	2642.97	GAPD
4	A4	15	64.1509	115938	2626.82	GAPD
4	A4	16	64.4474	115254	2616.23	GAPD
4	A4	17	64.7438	114033	2609.06	GAPD
4	A4	18	65.0402	112931	2604.67	GAPD
4	A4	19	65.3366	112778	2603.69	GAPD
4	A4	20	65.6331	111747	2606.59	GAPD
4	A4	21	65.9295	110997	2612.56	GAPD
4	A4	22	66.2259	110158	2619.6	GAPD
4	A4	23	66.5224	108977	2625.44	GAPD
4	A4	24	66.8188	108513	2628.39	GAPD
4	A4	25	67.1152	107444	2627.75	GAPD
4	A4	26	67.4117	106833	2623.82	GAPD
4	A4	27	67.7081	105645	2617.84	GAPD
4	A4	28	68.0045	104782	2611.5	GAPD
4	A4	29	68.301	104270	2606.29	GAPD
4	A4	30	68.5974	103608	2602.79	GAPD
4	A4	31	68.8938	102558	2600.54	GAPD
4	A4	32	69.1902	101576	2598.6	GAPD
4	A4	33	69.4867	100872	2596.16	GAPD
4	A4	34	69.7831	100348	2592.63	GAPD
4	A4	35	70.0795	99260	2587.42	GAPD
4	A4	36	70.376	98557.6	2579.94	GAPD
4	A4	37	70.6724	97635.3	2569.96	GAPD
4	A4	38	70.9688	96744.8	2558.07	GAPD
4	A4	39	71.2653	96168.9	2545.47	GAPD
4	A4	40	71.5617	95292.4	2533.48	GAPD
4	A4	41	71.8581	94711.6	2522.86	GAPD
4	A4	42	72.1546	93618.6	2513.65	GAPD
4	A4	43	72.451	93111.7	2505.4	GAPD
4	A4	44	72.7474	92362.7	2497.61	GAPD
4	A4	45	73.0438	91688.1	2479.95	GAPD
4	A4	46	73.3403	90702.4	2462.32	GAPD
4	A4	47	73.6367	89942.5	2447.38	GAPD
4	A4	48	73.9331	89709.9	2436.64	GAPD
4	A4	49	74.2296	88600.1	2430.96	GAPD
4	A4	50	74.526	87915.9	2430.4	GAPD
4	A4	51	74.8224	86987.8	2434.31	GAPD
4	A4	52	75.1189	86784.3	2441.35	GAPD
4	A4	53	75.4153	85829	2449.25	GAPD
4	A4	54	75.7117	84798.9	2454.49	GAPD
4	A4	55	76.0081	84360.1	2453.24	GAPD
4	A4	56	76.3046	83832.1	2442.66	GAPD
4	A4	57	76.601	82331.6	2422.22	GAPD
4	A4	58	76.8974	82220.2	2394.1	GAPD
4	A4	59	77.1939	81218	2362.45	GAPD
4	A4	60	77.4903	80579.2	2331.99	GAPD
4	A4	61	77.7867	79948.3	2306.8	GAPD
4	A4	62	78.0832	79142.7	2289.48	GAPD
4	A4	63	78.3796	78559.5	2280.68	GAPD
4	A4	64	78.676	77790.1	2278.5	GAPD
4	A4	65	78.9725	77559.6	2278.35	GAPD
4	A4	66	79.2689	76370.7	2273.92	GAPD
4	A4	67	79.5653	75494.3	2259.37	GAPD
4	A4	68	79.8617	75355.9	2231.69	GAPD
4	A4	69	80.1582	74377.5	2192.1	GAPD
4	A4	70	80.4546	73745.1	2146.05	GAPD
4	A4	71	80.751	73085.7	2102.43	GAPD
4	A4	72	81.0475	72499.5	2071.87	GAPD
4	A4	73	81.3439	71943.8	2063.95	GAPD
4	A4	74	81.6403	71449	2083.03	GAPD
4	A4	75	81.9368	70817.1	2124.75	GAPD
4	A4	76	82.2332	70162	2175.63	GAPD
4	A4	77	82.5296	69567.8	2218.29	GAPD
4	A4	78	82.8261	68374.8	2240.64	GAPD
4	A4	79	83.1225	67376.5	2244.7	GAPD
4	A4	80	83.4189	67517.9	2249.56	GAPD
4	A4	81	83.7153	66656.7	2287.23	GAPD
4	A4	82	84.0118	65981.4	2396.89	GAPD
4	A4	83	84.3082	65865.7	2548.6	GAPD
4	A4	84	84.6046	64634.4	2717.02	GAPD
4	A4	85	84.9011	63675.5	3009.45	GAPD
4	A4	86	85.1975	62476.4	3493.69	GAPD
4	A4	87	85.4939	61673.7	4241.18	GAPD
4	A4	88	85.7904	60787.2	5285.48	GAPD
4	A4	89	86.0868	58001.4	6568.36	GAPD
4	A4	90	86.3832	53650.4	7905.99	GAPD
4	A4	91	86.6797	41945.3	9011.95	GAPD
4	A4	92	86.9761	24101.5	9587.57	GAPD
4	A4	93	87.2725	19685.1	9444.42	GAPD
4	A4	94	87.5689	19603.9	8591.58	GAPD
4	A4	95	87.8654	18778	7234.48	GAPD
4	A4	96	88.1618	18907.3	5685.97	GAPD
4	A4	97	88.4582	18874.2	4243.63	GAPD
4	A4	98	88.7547	19306.4	3099.12	GAPD
4	A4	99	89.0511	18962.1	2037.03	GAPD
4	A4	100	89.3475	19489.2	867.83	GAPD
4	A4	101	89.644	19220.9	278.077	GAPD
4	A4	102	89.9404	18875.4	37.2207	GAPD
4	A4	103	90.2368	18539.7	-33.3816	GAPD
4	A4	104	90.5332	18438.1	-42.6543	GAPD
4	A4	105	90.8297	19108.1	-39.8535	GAPD
4	A4	106	91.1261	18698.3	-37.0686	GAPD
4	A4	107	91.4225	18456.3	-32.4143	GAPD
4	A4	108	91.719	18264	-25.6699	GAPD
4	A4	109	92.0154	18613.8	-23.2253	GAPD
4	A4	110	92.3118	18059.9	-34.9236	GAPD
4	A4	111	92.6083	18067.4	-68.0315	GAPD
4	A4	112	92.9047	17976.2	-122.818	GAPD
4	A4	113	93.2011	18086.5	-191.749	GAPD
4	A4	114	93.4976	18251.2	-262.36	GAPD
4	A4	115	93.794	18063.2	-322.405	GAPD
4	A4	116	94.0904	18376.7	-364.886	GAPD
4	A4	117	94.3869	18217.1	-390.366	GAPD
4	A4	118	94.6833	18089.9	-405.498	GAPD
5	A5	1	60.0015	103864	2461.43	GAPD
5	A5	2	60.298	103650	2463.27	GAPD
5	A5	3	60.5945	102487	2466.07	GAPD
5	A5	4	60.8911	101823	2471.98	GAPD
5	A5	5	61.1876	101600	2483.34	GAPD
5	A5	6	61.4841	100826	2501.13	GAPD
5	A5	7	61.7806	99631.1	2523.55	GAPD
5	A5	8	62.0771	99404.4	2545.8	GAPD
5	A5	9	62.3736	98629.5	2561.69	GAPD
5	A5	10	62.6702	97333.9	2566.41	GAPD
5	A5	11	62.9667	96310.9	2558.99	GAPD
5	A5	12	63.2632	95358.9	2542.88	GAPD
5	A5	13	63.5597	94556.8	2524.19	GAPD
5	A5	14	63.8562	94032.3	2508.68	GAPD
5	A5	15	64.1527	93151.4	2499.38	GAPD
5	A5	16	64.4493	92580	2496.04	GAPD
5	A5	17	64.7458	91476.5	2496.33	GAPD
5	A5	18	65.0423	90706	2497.68	GAPD
5	A5	19	65.3388	90137.2	2498.36	GAPD
5	A5	20	65.6353	88929	2497.57	GAPD
5	A5	21	65.9318	88272.7	2494.84	GAPD
5	A5	22	66.2284	87967.6	2489.79	GAPD
5	A5	23	66.5249	86741.1	2482.56	GAPD
5	A5	24	66.8214	85505.8	2474.27	GAPD
5	A5	25	67.1179	85050.4	2466.87	GAPD
5	A5	26	67.4144	84760.7	2462.08	GAPD
5	A5	27	67.711	83682	2460.55	GAPD
5	A5	28	68.0075	82815.8	2461.77	GAPD
5	A5	29	68.304	82128.3	2464.9	GAPD
5	A5	30	68.6005	81241.5	2469.57	GAPD
5	A5	31	68.897	80674.1	2475.71	GAPD
5	A5	32	69.1935	79723.2	2482.75	GAPD
5	A5	33	69.4901	79573.7	2489.09	GAPD
5	A5	34	69.7866	77874.1	2492.48	GAPD
5	A5	35	70.0831	77495.7	2491.06	GAPD
5	A5	36	70.3796	76525	2484.27	GAPD
5	A5	37	70.6761	75902.3	2473.02	GAPD
5	A5	38	70.9726	74952.9	2459.26	GAPD
5	A5	39	71.2692	74249	2445.38	GAPD
5	A5	40	71.5657	73853.6	2433.85	GAPD
5	A5	41	71.8622	72320.6	2423.58	GAPD
5	A5	42	72.1587	72262.9	2417.76	GAPD
5	A5	43	72.4552	71767.2	2423.09	GAPD
5	A5	44	72.7518	70795.4	2428.91	GAPD
5	A5	45	73.0483	69795.5	2426.47	GAPD
5	A5	46	73.3448	69232.4	2404.26	GAPD
5	A5	47	73.6413	68152	2363.67	GAPD
5	A5	48	73.9378	67720.9	2313.97	GAPD
5	A5	49	74.2343	66995.3	2268.65	GAPD
5	A5	50	74.5309	66572.9	2238.85	GAPD
5	A5	51	74.8274	65765.1	2228.78	GAPD
5	A5	52	75.1239	65247.5	2235.54	GAPD
5	A5	53	75.4204	64450.4	2252.6	GAPD
5	A5	54	75.7169	63576.7	2273.98	GAPD
5	A5	55	76.0134	62968.8	2296.57	GAPD
5	A5	56	76.31	62729.7	2319.58	GAPD
5	A5	57	76.6065	61463.1	2342.9	GAPD
5	A5	58	76.903	60836.4	2365.85	GAPD
5	A5	59	77.1995	60161.2	2387.02	GAPD
5	A5	60	77.496	59447.6	2404.46	GAPD
5	A5	61	77.7925	58495.6	2415.67	GAPD
5	A5	62	78.0891	58059.8	2417.36	GAPD
5	A5	63	78.3856	57272.3	2406.16	GAPD
5	A5	64	78.6821	56111.2	2380.07	GAPD
5	A5	65	78.9786	55786.1	2340.05	GAPD
5	A5	66	79.2751	55059.1	2290.61	GAPD
5	A5	67	79.5717	54351.9	2239.16	GAPD
5	A5	68	79.8682	53596.1	2194.19	GAPD
5	A5	69	80.1647	53216.7	2163.1	GAPD
5	A5	70	80.4612	52411.4	2150.04	GAPD
5	A5	71	80.7577	51918.1	2154.15	GAPD
5	A5	72	81.0542	51466.9	2169.8	GAPD
5	A5	73	81.3508	50479.5	2189.34	GAPD
5	A5	74	81.6473	49631.9	2207.58	GAPD
5	A5	75	81.9438	49004.1	2224.93	GAPD
5	A5	76	82.2403	48511.7	2246.61	GAPD
5	A5	77	82.5368	48216.5	2278.36	GAPD
5	A5	78	82.8333	47427.5	2322.46	GAPD
5	A5	79	83.1299	45936.5	2378.05	GAPD
5	A5	80	83.4264	45639.7	2434.68	GAPD
5	A5	81	83.7229	45222.4	2466.95	GAPD
5	A5	82	84.0194	43856.7	2517.35	GAPD
5	A5	83	84.3159	43757.8	2604.53	GAPD
5	A5	84	84.6124	42611	2759.85	GAPD
5	A5	85	84.909	41848.6	3030.51	GAPD
5	A5	86	85.2055	40452.9	3476.06	GAPD
5	A5	87	85.502	39435.9	4150.02	GAPD
5	A5	88	85.7985	37584.3	5063.83	GAPD
5	A5	89	86.095	34542.8	6145.38	GAPD
5	A5	90	86.3916	27670	7219.69	GAPD
5	A5	91	86.6881	9540.92	8040.23	GAPD
5	A5	92	86.9846	-4475.24	8373.26	GAPD
5	A5	93	87.2811	-5380.98	8098.57	GAPD
5	A5	94	87.5776	-6046.32	7268.36	GAPD
5	A5	95	87.8741	-6229.76	6086.47	GAPD
5	A5	96	88.1707	-5600.05	4820.05	GAPD
5	A5	97	88.4672	-6270.5	3696.89	GAPD
5	A5	98	88.7637	-6210.39	2842	GAPD
5	A5	99	89.0602	-6210.04	1985.23	GAPD
5	A5	100	89.3567	-6250.69	1030.27	GAPD
5	A5	101	89.6532	-6350.58	532.575	GAPD
5	A5	102	89.9498	-6231.67	302.303	GAPD
5	A5	103	90.2463	-6560.92	209.689	GAPD
5	A5	104	90.5428	-6407.48	181.351	GAPD
5	A5	105	90.8393	-6557.92	181.483	GAPD
5	A5	106	91.1358	-6296.2	193.401	GAPD
5	A5	107	91.4324	-6880.05	207.199	GAPD
5	A5	108	91.7289	-6770.76	214.043	GAPD
5	A5	109	92.0254	-6659.92	205.77	GAPD
5	A5	110	92.3219	-7178.99	177.557	GAPD
5	A5	111	92.6184	-7177.54	130.833	GAPD
5	A5	112	92.9149	-6647.73	73.7632	GAPD
5	A5	113	93.2115	-6825.36	18.1758	GAPD
5	A5	114	93.508	-6946.08	-25.7131	GAPD
5	A5	115	93.8045	-6562.57	-53.7258	GAPD
5	A5	116	94.101	-7012.05	-68.6436	GAPD
5	A5	117	94.3975	-6951.25	-77.4319	GAPD
5	A5	118	94.694	-6613.36	-87.0159	GAPD
6	A6	1	60.0015	120018	2373.81	GAPD
6	A6	2	60.298	119573	2372.57	GAPD
6	A6	3	60.5945	119041	2382.69	GAPD
6	A6	4	60.8911	118136	2395.81	GAPD
6	A6	5	61.1876	118168	2413.58	GAPD
6	A6	6	61.4841	117395	2431.14	GAPD
6	A6	7	61.7806	116144	2442.89	GAPD
6	A6	8	62.0771	115468	2444.94	GAPD
6	A6	9	62.3736	114666	2436.8	GAPD
6	A6	10	62.6702	113411	2421.5	GAPD
6	A6	11	62.9667	113289	2403.97	GAPD
6	A6	12	63.2632	112073	2388.99	GAPD
6	A6	13	63.5597	111632	2379.49	GAPD
6	A6	14	63.8562	110866	2371.02	GAPD
6	A6	15	64.1527	110052	2374.8	GAPD
6	A6	16	64.4493	109777	2382.16	GAPD
6	A6	17	64.7458	108288	2390.01	GAPD
6	A6	18	65.0423	107793	2401.92	GAPD
6	A6	19	65.3388	107186	2419.14	GAPD
6	A6	20	65.6353	106463	2441.35	GAPD
6	A6	21	65.9318	105783	2465.54	GAPD
6	A6	22	66.2284	104951	2486.58	GAPD
6	A6	23	66.5249	103887	2499.31	GAPD
6	A6	24	66.8214	102817	2500.84	GAPD
6	A6	25	67.1179	101969	2491.91	GAPD
6	A6	26	67.4144	101346	2476.34	GAPD
6	A6	27	67.711	100193	2459.22	GAPD
6	A6	28	68.0075	99587.7	2444.76	GAPD
6	A6	29	68.304	99054.1	2434.95	GAPD
6	A6	30	68.6005	98346.4	2429.65	GAPD
6	A6	31	68.897	97224.5	2427.75	GAPD
6	A6	32	69.1935	96434	2428.33	GAPD
6	A6	33	69.4901	95564.6	2430.81	GAPD
6	A6	34	69.7866	95534.8	2434.18	GAPD
6	A6	35	70.0831	94264.7	2436.22	GAPD
6	A6	36	70.3796	93438.1	2433.94	GAPD
6	A6	37	70.6761	92497.7	2424.96	GAPD
6	A6	38	70.9726	91716.6	2409.07	GAPD
6	A6	39	71.2692	90980.2	2388.73	GAPD
6	A6	40	71.5657	90626.3	2349.88	GAPD
6	A6	41	71.8622	89215.2	2307.54	GAPD
6	A6	42	72.1587	88983	2290.03	GAPD
6	A6	43	72.4552	88440	2300.45	GAPD
6	A6	44	72.7518	88007.8	2332.1	GAPD
6	A6	45	73.0483	86950.4	2370.44	GAPD
6	A6	46	73.3448	85843.1	2385.95	GAPD
6	A6	47	73.6413	85449.4	2388	GAPD
6	A6	48	73.9378	84532.9	2380.86	GAPD
6	A6	49	74.2343	83724	2345.85	GAPD
6	A6	50	74.5309	83002.7	2302.05	GAPD
6	A6	51	74.8274	82265.7	2268.13	GAPD
6	A6	52	75.1239	82156	2255.18	GAPD
6	A6	53	75.4204	80983	2266.31	GAPD
6	A6	54	75.7169	80551.2	2296.14	GAPD
6	A6	55	76.0134	79866.1	2333.62	GAPD
6	A6	56	76.31	78972.6	2367.03	GAPD
6	A6	57	76.6065	77890.2	2382.41	GAPD
6	A6	58	76.903	77517.1	2385.55	GAPD
6	A6	59	77.1995	76483.4	2385.43	GAPD
6	A6	60	77.496	75954.7	2384.29	GAPD
6	A6	61	77.7925	75307.7	2384.25	GAPD
6	A6	62	78.0891	73988	2386.55	GAPD
6	A6	63	78.3856	73915.7	2391.1	GAPD
6	A6	64	78.6821	72941.4	2395.98	GAPD
6	A6	65	78.9786	72551.9	2397.61	GAPD
6	A6	66	79.2751	71180.8	2391.86	GAPD
6	A6	67	79.5717	70402.5	2371.47	GAPD
6	A6	68	79.8682	69820.7	2303.16	GAPD
6	A6	69	80.1647	68947.1	2224.1	GAPD
6	A6	70	80.4612	68742.6	2154.17	GAPD
6	A6	71	80.7577	68068.7	2110.44	GAPD
6	A6	72	81.0542	67679.1	2099.89	GAPD
6	A6	73	81.3508	66670.8	2117.6	GAPD
6	A6	74	81.6473	66093	2151	GAPD
6	A6	75	81.9438	65458.8	2187.18	GAPD
6	A6	76	82.2403	64578.5	2219.26	GAPD
6	A6	77	82.5368	63918.7	2249.29	GAPD
6	A6	78	82.8333	63321.6	2286.63	GAPD
6	A6	79	83.1299	62583.8	2343.82	GAPD
6	A6	80	83.4264	62222.9	2398.13	GAPD
6	A6	81	83.7229	61036	2445.2	GAPD
6	A6	82	84.0194	60489.1	2513.39	GAPD
6	A6	83	84.3159	59432.4	2616.52	GAPD
6	A6	84	84.6124	58619.7	2783.84	GAPD
6	A6	85	84.909	57352.3	3065.65	GAPD
6	A6	86	85.2055	56521.2	3529.22	GAPD
6	A6	87	85.502	55299.3	4237.11	GAPD
6	A6	88	85.7985	53612.8	5206.21	GAPD
6	A6	89	86.095	50041.2	6361.81	GAPD
6	A6	90	86.3916	42937.5	7516.57	GAPD
6	A6	91	86.6881	25069.4	8404.15	GAPD
6	A6	92	86.9846	9477.25	8770.12	GAPD
6	A6	93	87.2811	7626.46	8481.29	GAPD
6	A6	94	87.5776	7729.91	7591.1	GAPD
6	A6	95	87.8741	8249.58	6319.02	GAPD
6	A6	96	88.1707	8058.99	4955.54	GAPD
6	A6	97	88.4672	7897.01	3749.56	GAPD
6	A6	98	88.7637	7874.01	2837.63	GAPD
6	A6	99	89.0602	7814.69	1988.39	GAPD
6	A6	100	89.3567	7668.58	1029.47	GAPD
6	A6	101	89.6532	7449.62	544.937	GAPD
6	A6	102	89.9498	7821.46	331.526	GAPD
6	A6	103	90.2463	7305.17	251.712	GAPD
6	A6	104	90.5428	7625.01	227.228	GAPD
6	A6	105	90.8393	7181.67	218.05	GAPD
6	A6	106	91.1358	7024.71	205.043	GAPD
6	A6	107	91.4324	7096.26	180.9	GAPD
6	A6	108	91.7289	7091.72	146.12	GAPD
6	A6	109	92.0254	7247.48	105.735	GAPD
6	A6	110	92.3219	7010.34	65.4409	GAPD
6	A6	111	92.6184	6838.39	28.4548	GAPD
6	A6	112	92.9149	7230.72	-5.41968	GAPD
6	A6	113	93.2115	7150.47	-38.5481	GAPD
6	A6	114	93.508	6804.69	-73.3352	GAPD
6	A6	115	93.8045	7039.75	-110.558	GAPD
6	A6	116	94.101	7366.46	-148.958	GAPD
6	A6	117	94.3975	7110.26	-186.172	GAPD
6	A6	118	94.694	7243.8	-220.375	GAPD
7	A7	1	60.0012	124928	2595.71	GAPD
7	A7	2	60.2976	124350	2600.62	GAPD
7	A7	3	60.5941	124355	2607.12	GAPD
7	A7	4	60.8905	122536	2615.24	GAPD
7	A7	5	61.1869	122768	2625.51	GAPD
7	A7	6	61.4834	121491	2638.47	GAPD
7	A7	7	61.7798	120926	2653.69	GAPD
7	A7	8	62.0762	119837	2668.93	GAPD
7	A7	9	62.3727	119147	2680.28	GAPD
7	A7	10	62.6691	118766	2683.85	GAPD
7	A7	11	62.9655	117123	2678.24	GAPD
7	A7	12	63.262	116142	2665.89	GAPD
7	A7	13	63.5584	115121	2652.09	GAPD
7	A7	14	63.8548	114673	2642.1	GAPD
7	A7	15	64.1513	114109	2638.34	GAPD
7	A7	16	64.4477	113610	2639.97	GAPD
7	A7	17	64.7441	111575	2644.61	GAPD
7	A7	18	65.0406	111210	2650.53	GAPD
7	A7	19	65.337	110677	2657.58	GAPD
7	A7	20	65.6334	109641	2666.39	GAPD
7	A7	21	65.9298	108701	2677.12	GAPD
7	A7	22	66.2263	107980	2688.75	GAPD
7	A7	23	66.5227	106831	2699.26	GAPD
7	A7	24	66.8191	106311	2706.17	GAPD
7	A7	25	67.1156	104773	2707.1	GAPD
7	A7	26	67.412	104459	2700.44	GAPD
7	A7	27	67.7084	103126	2685.86	GAPD
7	A7	28	68.0049	102185	2664.66	GAPD
7	A7	29	68.3013	101533	2639.6	GAPD
7	A7	30	68.5977	100374	2614.07	GAPD
7	A7	31	68.8942	100147	2591.14	GAPD
7	A7	32	69.1906	99147.8	2572.93	GAPD
7	A7	33	69.487	98330.6	2546.92	GAPD
7	A7	34	69.7835	97313	2528.62	GAPD
7	A7	35	70.0799	97116.6	2527	GAPD
7	A7	36	70.3763	96235	2537.45	GAPD
7	A7	37	70.6728	95433.8	2552.96	GAPD
7	A7	38	70.9692	94278.6	2566.08	GAPD
7	A7	39	71.2656	93895.1	2569.01	GAPD
7	A7	40	71.5621	92918.6	2568.26	GAPD
7	A7	41	71.8585	92117.2	2562.56	GAPD
7	A7	42	72.1549	91225.2	2555.34	GAPD
7	A7	43	72.4514	90866.8	2551.77	GAPD
7	A7	44	72.7478	89650	2552.91	GAPD
7	A7	45	73.0442	89455.6	2557.19	GAPD
7	A7	46	73.3407	88167	2562.13	GAPD
7	A7	47	73.6371	87341.8	2566.15	GAPD
7	A7	48	73.9335	86892.9	2567.9	GAPD
7	A7	49	74.23	85909.6	2567.81	GAPD
7	A7	50	74.5264	85389.2	2562.05	GAPD
7	A7	51	74.8228	84289.2	2545.16	GAPD
7	A7	52	75.1193	83713.1	2514.77	GAPD
7	A7	53	75.4157	82456.4	2473.12	GAPD
7	A7	54	75.7121	82134.2	2428.59	GAPD
7	A7	55	76.0086	81621.2	2393.18	GAPD
7	A7	56	76.305	80541.2	2378.28	GAPD
7	A7	57	76.6014	80169.9	2390.58	GAPD
7	A7	58	76.8978	79033.9	2429.57	GAPD
7	A7	59	77.1943	78817.1	2487.01	GAPD
7	A7	60	77.4907	78012.8	2548.93	GAPD
7	A7	61	77.7871	76615	2578.44	GAPD
7	A7	62	78.0836	75870.3	2587.94	GAPD
7	A7	63	78.38	75315.5	2588.31	GAPD
7	A7	64	78.6764	74324.4	2580.71	GAPD
7	A7	65	78.9729	73781.1	2567.71	GAPD
7	A7	66	79.2693	72965	2521.54	GAPD
7	A7	67	79.5657	71861.6	2472.48	GAPD
7	A7	68	79.8622	71558	2423.22	GAPD
7	A7	69	80.1586	70911.8	2374.05	GAPD
7	A7	70	80.455	69871.6	2325.08	GAPD
7	A7	71	80.7515	69191.3	2279.03	GAPD
7	A7	72	81.0479	68580.5	2242.91	GAPD
7	A7	73	81.3443	67898.2	2227.07	GAPD
7	A7	74	81.6408	67491.4	2240.74	GAPD
7	A7	75	81.9372	66796.4	2286.11	GAPD
7	A7	76	82.2336	66164.7	2355.04	GAPD
7	A7	77	82.5301	65476.3	2431.64	GAPD
7	A7	78	82.8265	64092.6	2500.71	GAPD
7	A7	79	83.1229	63516.9	2557.82	GAPD
7	A7	80	83.4194	62620.3	2583.82	GAPD
7	A7	81	83.7158	62180.6	2613.83	GAPD
7	A7	82	84.0122	61450.6	2669.56	GAPD
7	A7	83	84.3087	60765.9	2772.55	GAPD
7	A7	84	84.6051	59850.9	2955.38	GAPD
7	A7	85	84.9015	58629.4	3267.41	GAPD
7	A7	86	85.198	57057.8	3773.45	GAPD
7	A7	87	85.4944	56087.1	4534.06	GAPD
7	A7	88	85.7908	54447.8	5564.34	GAPD
7	A7	89	86.0872	51343.7	6785.22	GAPD
7	A7	90	86.3837	44871.8	8000.19	GAPD
7	A7	91	86.6801	27715.2	8930.29	GAPD
7	A7	92	86.9765	9270.6	9310.04	GAPD
7	A7	93	87.273	6520.99	9002.14	GAPD
7	A7	94	87.5694	6274.01	8064.88	GAPD
7	A7	95	87.8658	5671.77	6728.84	GAPD
7	A7	96	88.1623	5982.83	5296.91	GAPD
7	A7	97	88.4587	6297.57	4027.54	GAPD
7	A7	98	88.7551	5864.21	3062.37	GAPD
7	A7	99	89.0516	5632.17	2134.13	GAPD
7	A7	100	89.348	5668.37	1018.39	GAPD
7	A7	101	89.6444	5598.43	431.312	GAPD
7	A7	102	89.9409	5935.82	151.181	GAPD
7	A7	103	90.2373	5506.42	27.9397	GAPD
7	A7	104	90.5337	5813.46	-24.2402	GAPD
7	A7	105	90.8302	5417.54	-49.7473	GAPD
7	A7	106	91.1266	5410.97	-69.6235	GAPD
7	A7	107	91.423	5409.19	-90.728	GAPD
7	A7	108	91.7195	5665.08	-110.462	GAPD
7	A7	109	92.0159	5540.72	-121.83	GAPD
7	A7	110	92.3123	5718.36	-119.406	GAPD
7	A7	111	92.6088	5334.76	-103.668	GAPD
7	A7	112	92.9052	5471.41	-81.3457	GAPD
7	A7	113	93.2016	5516.34	-62.0115	GAPD
7	A7	114	93.4981	5107.99	-53.2839	GAPD
7	A7	115	93.7945	5295.04	-57.4028	GAPD
7	A7	116	94.0909	5225.88	-70.7505	GAPD
7	A7	117	94.3874	5529.03	-86.2468	GAPD
7	A7	118	94.6838	5286.99	-97.1389	GAPD
8	A8	1	60.0012	129185	2725.15	GAPD
8	A8	2	60.2976	128373	2736.19	GAPD
8	A8	3	60.5941	127250	2745.21	GAPD
8	A8	4	60.8905	126963	2750.46	GAPD
8	A8	5	61.1869	126211	2751.77	GAPD
8	A8	6	61.4834	125416	2750.85	GAPD
8	A8	7	61.7798	124098	2750.74	GAPD
8	A8	8	62.0762	123387	2754.27	GAPD
8	A8	9	62.3727	123213	2762.62	GAPD
8	A8	10	62.6691	122079	2774.68	GAPD
8	A8	11	62.9655	121133	2787.71	GAPD
8	A8	12	63.262	120217	2798.76	GAPD
8	A8	13	63.5584	119221	2805.74	GAPD
8	A8	14	63.8548	118414	2807.8	GAPD
8	A8	15	64.1513	117681	2805.21	GAPD
8	A8	16	64.4477	116521	2799.29	GAPD
8	A8	17	64.7441	115422	2792.14	GAPD
8	A8	18	65.0406	114828	2786.19	GAPD
8	A8	19	65.337	114031	2783.31	GAPD
8	A8	20	65.6334	113171	2783.99	GAPD
8	A8	21	65.9298	111964	2787.17	GAPD
8	A8	22	66.2263	111589	2790.87	GAPD
8	A8	23	66.5227	110565	2793.25	GAPD
8	A8	24	66.8191	109144	2793.52	GAPD
8	A8	25	67.1156	108593	2792	GAPD
8	A8	26	67.412	107792	2789.57	GAPD
8	A8	27	67.7084	107074	2786.91	GAPD
8	A8	28	68.0049	105658	2784.24	GAPD
8	A8	29	68.3013	105205	2781.48	GAPD
8	A8	30	68.5977	104156	2778.55	GAPD
8	A8	31	68.8942	103542	2775.57	GAPD
8	A8	32	69.1906	102274	2772.62	GAPD
8	A8	33	69.487	101939	2769.65	GAPD
8	A8	34	69.7835	100620	2766.38	GAPD
8	A8	35	70.0799	99931.7	2762.27	GAPD
8	A8	36	70.3763	99234.8	2756.84	GAPD
8	A8	37	70.6728	98301.7	2749.91	GAPD
8	A8	38	70.9692	97209.3	2742.03	GAPD
8	A8	39	71.2656	96349.5	2734.28	GAPD
8	A8	40	71.5621	96033.7	2727.79	GAPD
8	A8	41	71.8585	94777	2717.99	GAPD
8	A8	42	72.1549	94269.9	2704.3	GAPD
8	A8	43	72.4514	93155.5	2686.87	GAPD
8	A8	44	72.7478	92520	2661.32	GAPD
8	A8	45	73.0442	91599.5	2627.3	GAPD
8	A8	46	73.3407	90868.6	2589.4	GAPD
8	A8	47	73.6371	89952.9	2555.31	GAPD
8	A8	48	73.9335	89324.9	2531.98	GAPD
8	A8	49	74.23	88892.6	2521.97	GAPD
8	A8	50	74.5264	87798.6	2522.34	GAPD
8	A8	51	74.8228	87071.3	2527.32	GAPD
8	A8	52	75.1193	86397.4	2532.84	GAPD
8	A8	53	75.4157	85209.6	2539.7	GAPD
8	A8	54	75.7121	84835.9	2553.08	GAPD
8	A8	55	76.0086	84192.4	2578.38	GAPD
8	A8	56	76.305	83490.3	2616.89	GAPD
8	A8	57	76.6014	82245.6	2663.55	GAPD
8	A8	58	76.8978	81632.1	2708.23	GAPD
8	A8	59	77.1943	80773.5	2729.71	GAPD
8	A8	60	77.4907	79862.5	2732.09	GAPD
8	A8	61	77.7871	78898.2	2725.4	GAPD
8	A8	62	78.0836	77967.5	2682.88	GAPD
8	A8	63	78.38	77229.3	2629.39	GAPD
8	A8	64	78.6764	76530.8	2580.94	GAPD
8	A8	65	78.9729	76053.4	2548.14	GAPD
8	A8	66	79.2693	75509.5	2530.49	GAPD
8	A8	67	79.5657	74457.8	2516.61	GAPD
8	A8	68	79.8622	73346.7	2491.66	GAPD
8	A8	69	80.1586	72620.2	2447.99	GAPD
8	A8	70	80.455	72013.4	2391.36	GAPD
8	A8	71	80.7515	71250.4	2338.71	GAPD
8	A8	72	81.0479	70953.2	2308.75	GAPD
8	A8	73	81.3443	70169.5	2311.49	GAPD
8	A8	74	81.6408	69627.9	2343.29	GAPD
8	A8	75	81.9372	68685.8	2390.24	GAPD
8	A8	76	82.2336	67685.5	2437.1	GAPD
8	A8	77	82.5301	66953.6	2476.06	GAPD
8	A8	78	82.8265	66409.3	2510.56	GAPD
8	A8	79	83.1229	65572.6	2553.06	GAPD
8	A8	80	83.4194	65153.1	2620.83	GAPD
8	A8	81	83.7158	63934.4	2728.41	GAPD
8	A8	82	84.0122	63154	2792.02	GAPD
8	A8	83	84.3087	62626.3	2900.27	GAPD
8	A8	84	84.6051	61623.9	3086.75	GAPD
8	A8	85	84.9015	60548	3404.21	GAPD
8	A8	86	85.198	59509.2	3920.14	GAPD
8	A8	87	85.4944	57851.3	4695.1	GAPD
8	A8	88	85.7908	55926.8	5741.61	GAPD
8	A8	89	86.0872	53043.7	6976.99	GAPD
8	A8	90	86.3837	46494.2	8201.44	GAPD
8	A8	91	86.6801	29711.9	9133.33	GAPD
8	A8	92	86.9765	10251.6	9505.27	GAPD
8	A8	93	87.273	7917.7	9179.73	GAPD
8	A8	94	87.5694	7613.25	8217.65	GAPD
8	A8	95	87.8658	7203.53	6855.33	GAPD
8	A8	96	88.1623	7887.39	5402.46	GAPD
8	A8	97	88.4587	7733.65	4122.37	GAPD
8	A8	98	88.7551	7763	3157.32	GAPD
8	A8	99	89.0516	7161.58	2114.9	GAPD
8	A8	100	89.348	7270.01	1000.66	GAPD
8	A8	101	89.6444	6873.64	414.242	GAPD
8	A8	102	89.9409	7495.21	120.584	GAPD
8	A8	103	90.2373	7098.53	-31.6855	GAPD
8	A8	104	90.5337	7138.85	-119.241	GAPD
8	A8	105	90.8302	7036.34	-171.611	GAPD
8	A8	106	91.1266	7154.54	-195.675	GAPD
8	A8	107	91.423	7350.7	-191.398	GAPD
8	A8	108	91.7195	7536.57	-161.037	GAPD
8	A8	109	92.0159	6779.19	-113.808	GAPD
8	A8	110	92.3123	7248.49	-65.5266	GAPD
8	A8	111	92.6088	6667.47	-33.1008	GAPD
8	A8	112	92.9052	6603.79	-26.8916	GAPD
8	A8	113	93.2016	6798.05	-45.8623	GAPD
8	A8	114	93.4981	6909.57	-78.7991	GAPD
8	A8	115	93.7945	6821.29	-110.59	GAPD
8	A8	116	94.0909	6608.48	-129.384	GAPD
8	A8	117	94.3874	6669.45	-130.58	GAPD
8	A8	118	94.6838	7013	-116.465	GAPD
9	A9	1	60.0015	134635	2752.78	GAPD
9	A9	2	60.298	134294	2789.55	GAPD
9	A9	3	60.5944	133362	2805.39	GAPD
9	A9	4	60.8909	132680	2820.53	GAPD
9	A9	5	61.1873	132256	2833.19	GAPD
9	A9	6	61.4838	130773	2842.77	GAPD
9	A9	7	61.7802	129993	2849.85	GAPD
9	A9	8	62.0767	129361	2855.45	GAPD
9	A9	9	62.3731	128254	2859.98	GAPD
9	A9	10	62.6696	127557	2863.17	GAPD
9	A9	11	62.9661	126695	2864.76	GAPD
9	A9	12	63.2625	125399	2865.35	GAPD
9	A9	13	63.559	124379	2866.42	GAPD
9	A9	14	63.8554	123732	2869.19	GAPD
9	A9	15	64.1519	122929	2873.27	GAPD
9	A9	16	64.4483	122270	2876.59	GAPD
9	A9	17	64.7448	120787	2876.77	GAPD
9	A9	18	65.0413	119559	2872.87	GAPD
9	A9	19	65.3377	119185	2866.03	GAPD
9	A9	20	65.6342	117963	2858.68	GAPD
9	A9	21	65.9306	117236	2852.93	GAPD
9	A9	22	66.2271	116475	2849.63	GAPD
9	A9	23	66.5235	115182	2848.59	GAPD
9	A9	24	66.82	114496	2849.29	GAPD
9	A9	25	67.1164	113629	2851.4	GAPD
9	A9	26	67.4129	112223	2854.55	GAPD
9	A9	27	67.7094	112096	2857.85	GAPD
9	A9	28	68.0058	110817	2859.82	GAPD
9	A9	29	68.3023	109773	2859.13	GAPD
9	A9	30	68.5987	108886	2855.83	GAPD
9	A9	31	68.8952	108078	2851.74	GAPD
9	A9	32	69.1916	106653	2849.42	GAPD
9	A9	33	69.4881	106626	2850.24	GAPD
9	A9	34	69.7846	105596	2852.85	GAPD
9	A9	35	70.081	104710	2853.63	GAPD
9	A9	36	70.3775	103320	2848.73	GAPD
9	A9	37	70.6739	102174	2836.51	GAPD
9	A9	38	70.9704	101820	2818.23	GAPD
9	A9	39	71.2668	100741	2797.12	GAPD
9	A9	40	71.5633	100112	2757.35	GAPD
9	A9	41	71.8597	99086.6	2706.22	GAPD
9	A9	42	72.1562	98202.2	2672.56	GAPD
9	A9	43	72.4527	97528	2659.99	GAPD
9	A9	44	72.7491	96774.4	2667.86	GAPD
9	A9	45	73.0456	96515	2689.49	GAPD
9	A9	46	73.342	95048.9	2713.21	GAPD
9	A9	47	73.6385	94288.5	2727.15	GAPD
9	A9	48	73.9349	93364.7	2724.97	GAPD
9	A9	49	74.2314	92420.2	2708.74	GAPD
9	A9	50	74.5278	91846.5	2686.8	GAPD
9	A9	51	74.8243	91141.9	2668.6	GAPD
9	A9	52	75.1208	90300.4	2660.29	GAPD
9	A9	53	75.4172	89228.8	2663.45	GAPD
9	A9	54	75.7137	88613.2	2676.39	GAPD
9	A9	55	76.0101	88253.8	2696.23	GAPD
9	A9	56	76.3066	86477.8	2720.1	GAPD
9	A9	57	76.603	86308.2	2745.32	GAPD
9	A9	58	76.8995	85563.4	2769.24	GAPD
9	A9	59	77.196	83944.9	2787.23	GAPD
9	A9	60	77.4924	83526.8	2791.89	GAPD
9	A9	61	77.7889	82918.2	2794.11	GAPD
9	A9	62	78.0853	81469.3	2793.41	GAPD
9	A9	63	78.3818	81230.9	2789.33	GAPD
9	A9	64	78.6782	79825	2771.8	GAPD
9	A9	65	78.9747	79099.4	2735.84	GAPD
9	A9	66	79.2711	78729.4	2688.5	GAPD
9	A9	67	79.5676	77636.3	2631.85	GAPD
9	A9	68	79.8641	76461	2569.68	GAPD
9	A9	69	80.1605	75991.1	2507.49	GAPD
9	A9	70	80.457	75739.5	2451.6	GAPD
9	A9	71	80.7534	74570.2	2407.95	GAPD
9	A9	72	81.0499	73814.1	2381.25	GAPD
9	A9	73	81.3463	73010.9	2374.72	GAPD
9	A9	74	81.6428	72855.7	2389.65	GAPD
9	A9	75	81.9393	71904.3	2424.75	GAPD
9	A9	76	82.2357	71044.6	2476.2	GAPD
9	A9	77	82.5322	70247.2	2539.63	GAPD
9	A9	78	82.8286	69443.9	2613.5	GAPD
9	A9	79	83.1251	68615.6	2702.12	GAPD
9	A9	80	83.4215	68083.5	2796.5	GAPD
9	A9	81	83.718	66960.2	2850.73	GAPD
9	A9	82	84.0145	66114.7	2935.69	GAPD
9	A9	83	84.3109	65260.1	3077.85	GAPD
9	A9	84	84.6074	64340.8	3322.64	GAPD
9	A9	85	84.9038	62922.3	3736.24	GAPD
9	A9	86	85.2003	61557.1	4392.8	GAPD
9	A9	87	85.4967	60399.6	5339.49	GAPD
9	A9	88	85.7932	58106.3	6545.21	GAPD
9	A9	89	86.0896	53029.2	7859.33	GAPD
9	A9	90	86.3861	40349.3	9018.09	GAPD
9	A9	91	86.6826	15705.6	9719.57	GAPD
9	A9	92	86.979	7100.16	9744.01	GAPD
9	A9	93	87.2755	6033.34	9055.41	GAPD
9	A9	94	87.5719	6038.55	7821.62	GAPD
9	A9	95	87.8684	5570.27	6339.62	GAPD
9	A9	96	88.1648	6058.23	4912.13	GAPD
9	A9	97	88.4613	5542.04	3746.19	GAPD
9	A9	98	88.7578	5569.06	2917.59	GAPD
9	A9	99	89.0542	5716.03	1596.46	GAPD
9	A9	100	89.3507	5264.59	704.424	GAPD
9	A9	101	89.6471	5725.68	256.906	GAPD
9	A9	102	89.9436	5842.32	60.9106	GAPD
9	A9	103	90.24	5384.3	-3.14771	GAPD
9	A9	104	90.5365	5740.14	-1.34204	GAPD
9	A9	105	90.8329	5404.71	29.6536	GAPD
9	A9	106	91.1294	5409.35	66.6597	GAPD
9	A9	107	91.4259	5334.07	93.4177	GAPD
9	A9	108	91.7223	5066.56	99.8499	GAPD
9	A9	109	92.0188	5013.82	83.3665	GAPD
9	A9	110	92.3152	4992.63	49.2502	GAPD
9	A9	111	92.6117	5195.46	8.35083	GAPD
9	A9	112	92.9081	5213.3	-27.843	GAPD
9	A9	113	93.2046	5175.43	-52.4419	GAPD
9	A9	114	93.501	4904.04	-65.5583	GAPD
9	A9	115	93.7975	5097.66	-72.4314	GAPD
9	A9	116	94.094	4866.42	-78.9521	GAPD
9	A9	117	94.3904	5081.14	-88.0012	GAPD
9	A9	118	94.6869	5176.82	-98.895	GAPD
13	B1	1	60.0014	107155	2496.33	SCARB1
13	B1	2	60.2978	106728	2512.86	SCARB1
13	B1	3	60.5942	105898	2532	SCARB1
13	B1	4	60.8906	105372	2550.88	SCARB1
13	B1	5	61.1871	104323	2567.53	SCARB1
13	B1	6	61.4835	103627	2580.93	SCARB1
13	B1	7	61.7799	103176	2590.79	SCARB1
13	B1	8	62.0763	101818	2597.35	SCARB1
13	B1	9	62.3727	101186	2601.32	SCARB1
13	B1	10	62.6691	100378	2603.8	SCARB1
13	B1	11	62.9655	99462.2	2605.51	SCARB1
13	B1	12	63.2619	98695	2606.02	SCARB1
13	B1	13	63.5584	97897.5	2603.73	SCARB1
13	B1	14	63.8548	96883.8	2596.98	SCARB1
13	B1	15	64.1512	96165.9	2585.87	SCARB1
13	B1	16	64.4476	95327.8	2573.23	SCARB1
13	B1	17	64.744	93962.4	2563.92	SCARB1
13	B1	18	65.0404	93785.6	2562.5	SCARB1
13	B1	19	65.3368	93133.6	2570.71	SCARB1
13	B1	20	65.6333	91739	2586.59	SCARB1
13	B1	21	65.9297	91305.2	2605.5	SCARB1
13	B1	22	66.2261	90272.3	2621.99	SCARB1
13	B1	23	66.5225	89361.4	2631.26	SCARB1
13	B1	24	66.8189	88654.6	2629.61	SCARB1
13	B1	25	67.1153	87577.2	2614.71	SCARB1
13	B1	26	67.4117	86886.7	2586.1	SCARB1
13	B1	27	67.7082	85707.4	2546.03	SCARB1
13	B1	28	68.0046	85225.5	2499.62	SCARB1
13	B1	29	68.301	84094.9	2453.48	SCARB1
13	B1	30	68.5974	83633.6	2413.26	SCARB1
13	B1	31	68.8938	82895.5	2381.5	SCARB1
13	B1	32	69.1902	82360.1	2357.27	SCARB1
13	B1	33	69.4866	81273.2	2337.95	SCARB1
13	B1	34	69.7831	80417.9	2321.5	SCARB1
13	B1	35	70.0795	80139.2	2307.67	SCARB1
13	B1	36	70.3759	78986.5	2297.36	SCARB1
13	B1	37	70.6723	78817.4	2291.12	SCARB1
13	B1	38	70.9687	77667.5	2288.54	SCARB1
13	B1	39	71.2651	76823.7	2288.32	SCARB1
13	B1	40	71.5615	76551	2288.92	SCARB1
13	B1	41	71.8579	75452.5	2288.61	SCARB1
13	B1	42	72.1544	75082.7	2285.31	SCARB1
13	B1	43	72.4508	73986.5	2276.71	SCARB1
13	B1	44	72.7472	73539.4	2257.75	SCARB1
13	B1	45	73.0436	72746.4	2228.7	SCARB1
13	B1	46	73.34	71692.5	2193.8	SCARB1
13	B1	47	73.6364	71732.5	2158	SCARB1
13	B1	48	73.9328	70421.2	2126.17	SCARB1
13	B1	49	74.2293	70155.9	2101.21	SCARB1
13	B1	50	74.5257	69401.9	2083.34	SCARB1
13	B1	51	74.8221	68815	2070.91	SCARB1
13	B1	52	75.1185	68036.6	2062.16	SCARB1
13	B1	53	75.4149	67408.1	2056.49	SCARB1
13	B1	54	75.7113	66698.8	2053.96	SCARB1
13	B1	55	76.0077	66393.5	2053.43	SCARB1
13	B1	56	76.3042	65527.7	2050.92	SCARB1
13	B1	57	76.6006	64886.9	2040.31	SCARB1
13	B1	58	76.897	64203.8	2016.93	SCARB1
13	B1	59	77.1934	63146.7	1981.83	SCARB1
13	B1	60	77.4898	62830.5	1943.65	SCARB1
13	B1	61	77.7862	62354.9	1916.12	SCARB1
13	B1	62	78.0826	61822.2	1912.12	SCARB1
13	B1	63	78.379	61203.5	1937.86	SCARB1
13	B1	64	78.6755	60671.4	1990.41	SCARB1
13	B1	65	78.9719	60074.7	2061.04	SCARB1
13	B1	66	79.2683	59397.3	2143.81	SCARB1
13	B1	67	79.5647	58137.2	2248.53	SCARB1
13	B1	68	79.8611	57927.7	2382.18	SCARB1
13	B1	69	80.1575	57101	2621.36	SCARB1
13	B1	70	80.4539	56469.8	3071.15	SCARB1
13	B1	71	80.7504	55572.6	3856.14	SCARB1
13	B1	72	81.0468	55549.8	5092.64	SCARB1
13	B1	73	81.3432	53981.3	6830.42	SCARB1
13	B1	74	81.6396	52981.1	8984.44	SCARB1
13	B1	75	81.936	50397.3	11291.5	SCARB1
13	B1	76	82.2324	44392.9	13333.7	SCARB1
13	B1	77	82.5288	32244.3	14647	SCARB1
13	B1	78	82.8252	18390.8	14884	SCARB1
13	B1	79	83.1217	11958.6	13953.3	SCARB1
13	B1	80	83.4181	9797.03	12060.6	SCARB1
13	B1	81	83.7145	8899.68	9625.94	SCARB1
13	B1	82	84.0109	8459.45	7124.25	SCARB1
13	B1	83	84.3073	8209.34	4932.41	SCARB1
13	B1	84	84.6037	8265.52	3248.52	SCARB1
13	B1	85	84.9001	8310.62	2043.87	SCARB1
13	B1	86	85.1966	8196.8	1120.49	SCARB1
13	B1	87	85.493	7956	597.413	SCARB1
13	B1	88	85.7894	7773.23	312.587	SCARB1
13	B1	89	86.0858	7531.68	149.821	SCARB1
13	B1	90	86.3822	7687.72	44.0144	SCARB1
13	B1	91	86.6786	7735.57	-30.5903	SCARB1
13	B1	92	86.975	8077.29	-78.2852	SCARB1
13	B1	93	87.2715	7705.13	-97.6396	SCARB1
13	B1	94	87.5679	7777.08	-90.2375	SCARB1
13	B1	95	87.8643	7690.98	-62.012	SCARB1
13	B1	96	88.1607	7720.33	-20.6589	SCARB1
13	B1	97	88.4571	7553.28	26.4761	SCARB1
13	B1	98	88.7535	7765.22	72.0835	SCARB1
13	B1	99	89.0499	7437.52	107.601	SCARB1
13	B1	100	89.3463	6984.35	123.682	SCARB1
13	B1	101	89.6428	7145.84	113.364	SCARB1
13	B1	102	89.9392	7267.92	76.0903	SCARB1
13	B1	103	90.2356	6672.81	19.5366	SCARB1
13	B1	104	90.532	7248.9	-42.4856	SCARB1
13	B1	105	90.8284	7306.65	-95.3384	SCARB1
13	B1	106	91.1248	7055.59	-129.424	SCARB1
13	B1	107	91.4212	7281.67	-143.573	SCARB1
13	B1	108	91.7177	7173.39	-144.194	SCARB1
13	B1	109	92.0141	6827.56	-140.707	SCARB1
13	B1	110	92.3105	7270.36	-139.977	SCARB1
13	B1	111	92.6069	6857.89	-143.12	SCARB1
13	B1	112	92.9033	7350.41	-146.495	SCARB1
13	B1	113	93.1997	7164.04	-145.844	SCARB1
13	B1	114	93.4961	7029.92	-140.381	SCARB1
13	B1	115	93.7926	7257.15	-133.77	SCARB1
13	B1	116	94.089	6662.1	-131.464	SCARB1
13	B1	117	94.3854	7029.01	-136.657	SCARB1
13	B1	118	94.6818	7280.95	-148.114	SCARB1
14	B2	1	60.0014	107934	2695.09	SCARB1
14	B2	2	60.2978	107726	2710.73	SCARB1
14	B2	3	60.5942	106512	2725.7	SCARB1
14	B2	4	60.8906	105594	2734.26	SCARB1
14	B2	5	61.1871	105562	2733.18	SCARB1
14	B2	6	61.4835	103917	2723.06	SCARB1
14	B2	7	61.7799	102972	2707.96	SCARB1
14	B2	8	62.0763	102657	2693.57	SCARB1
14	B2	9	62.3727	101522	2684.76	SCARB1
14	B2	10	62.6691	100940	2683.88	SCARB1
14	B2	11	62.9655	99719.4	2690.22	SCARB1
14	B2	12	63.2619	99152.5	2700.49	SCARB1
14	B2	13	63.5584	98291.9	2709.97	SCARB1
14	B2	14	63.8548	97326.8	2714.39	SCARB1
14	B2	15	64.1512	96283.5	2712.02	SCARB1
14	B2	16	64.4476	95754.6	2704.97	SCARB1
14	B2	17	64.744	94269.2	2698.47	SCARB1
14	B2	18	65.0404	93472.4	2697.77	SCARB1
14	B2	19	65.3368	93576.2	2704.53	SCARB1
14	B2	20	65.6333	91949.8	2715.44	SCARB1
14	B2	21	65.9297	91461.2	2724.46	SCARB1
14	B2	22	66.2261	89951.4	2726.88	SCARB1
14	B2	23	66.5225	89627.6	2722.4	SCARB1
14	B2	24	66.8189	87931.9	2714.29	SCARB1
14	B2	25	67.1153	87917.7	2706.08	SCARB1
14	B2	26	67.4117	87238.7	2698.33	SCARB1
14	B2	27	67.7082	85426.5	2688.33	SCARB1
14	B2	28	68.0046	85220.4	2672.54	SCARB1
14	B2	29	68.301	83870.4	2649.29	SCARB1
14	B2	30	68.5974	83447.9	2620.12	SCARB1
14	B2	31	68.8938	82535.8	2589.13	SCARB1
14	B2	32	69.1902	81638.3	2561.54	SCARB1
14	B2	33	69.4866	80824.8	2542.01	SCARB1
14	B2	34	69.7831	80133.9	2533.06	SCARB1
14	B2	35	70.0795	79664.7	2533.74	SCARB1
14	B2	36	70.3759	78498.4	2539.33	SCARB1
14	B2	37	70.6723	77945.8	2543	SCARB1
14	B2	38	70.9687	77022.7	2538.78	SCARB1
14	B2	39	71.2651	75905.1	2524.41	SCARB1
14	B2	40	71.5615	75058.3	2502.08	SCARB1
14	B2	41	71.8579	74948	2476.74	SCARB1
14	B2	42	72.1544	73770.8	2453.32	SCARB1
14	B2	43	72.4508	72965.8	2431.97	SCARB1
14	B2	44	72.7472	72481.4	2412.97	SCARB1
14	B2	45	73.0436	71686.4	2400.07	SCARB1
14	B2	46	73.34	70757.9	2391.5	SCARB1
14	B2	47	73.6364	70250.8	2385.73	SCARB1
14	B2	48	73.9328	69566.5	2381.38	SCARB1
14	B2	49	74.2293	68426.7	2376.71	SCARB1
14	B2	50	74.5257	68296.8	2369.43	SCARB1
14	B2	51	74.8221	67003	2357.01	SCARB1
14	B2	52	75.1185	66603.9	2337.37	SCARB1
14	B2	53	75.4149	65667.6	2310.08	SCARB1
14	B2	54	75.7113	65272.6	2277.55	SCARB1
14	B2	55	76.0077	64249.8	2245.43	SCARB1
14	B2	56	76.3042	63525.9	2221.1	SCARB1
14	B2	57	76.6006	63012.2	2210.13	SCARB1
14	B2	58	76.897	62894	2212.62	SCARB1
14	B2	59	77.1934	61500.5	2222.4	SCARB1
14	B2	60	77.4898	60888.2	2230.6	SCARB1
14	B2	61	77.7862	60061.9	2231.54	SCARB1
14	B2	62	78.0826	59529.3	2226.71	SCARB1
14	B2	63	78.379	58788.2	2223.94	SCARB1
14	B2	64	78.6755	58383.8	2232.8	SCARB1
14	B2	65	78.9719	57716.8	2261.22	SCARB1
14	B2	66	79.2683	57054.4	2317.77	SCARB1
14	B2	67	79.5647	55753.4	2421.34	SCARB1
14	B2	68	79.8611	55622.7	2564.03	SCARB1
14	B2	69	80.1575	54592.5	2822.12	SCARB1
14	B2	70	80.4539	54038.3	3288.33	SCARB1
14	B2	71	80.7504	53444.4	4068.03	SCARB1
14	B2	72	81.0468	52187.6	5253.55	SCARB1
14	B2	73	81.3432	51572.4	6871.67	SCARB1
14	B2	74	81.6396	49611.6	8825	SCARB1
14	B2	75	81.936	46768.4	10859.7	SCARB1
14	B2	76	82.2324	40316.9	12595.4	SCARB1
14	B2	77	82.5288	26951	13629.9	SCARB1
14	B2	78	82.8252	13930.4	13684.5	SCARB1
14	B2	79	83.1217	8248.7	12719	SCARB1
14	B2	80	83.4181	6101.06	10952.6	SCARB1
14	B2	81	83.7145	5665.18	8776.01	SCARB1
14	B2	82	84.0109	5045.59	6603.78	SCARB1
14	B2	83	84.3073	4927.13	4745.04	SCARB1
14	B2	84	84.6037	4557.87	3345.39	SCARB1
14	B2	85	84.9001	3791.01	2390.12	SCARB1
14	B2	86	85.1966	4066.18	1587.36	SCARB1
14	B2	87	85.493	4012.08	1159.38	SCARB1
14	B2	88	85.7894	3458.7	966.101	SCARB1
14	B2	89	86.0858	3292.54	901.49	SCARB1
14	B2	90	86.3822	2625.16	891.586	SCARB1
14	B2	91	86.6786	2531.29	887.846	SCARB1
14	B2	92	86.975	2172.63	862.201	SCARB1
14	B2	93	87.2715	1806.19	803.634	SCARB1
14	B2	94	87.5679	1444.69	714.101	SCARB1
14	B2	95	87.8643	1819.97	603.008	SCARB1
14	B2	96	88.1607	1472.68	481.591	SCARB1
14	B2	97	88.4571	1278.48	359.433	SCARB1
14	B2	98	88.7535	1165.62	244.253	SCARB1
14	B2	99	89.0499	1258.3	143.641	SCARB1
14	B2	100	89.3463	1480.05	65.8367	SCARB1
14	B2	101	89.6428	1563.92	17.7234	SCARB1
14	B2	102	89.9392	1351.51	1.15869	SCARB1
14	B2	103	90.2356	1336.76	10.7095	SCARB1
14	B2	104	90.532	1509.34	34.8838	SCARB1
14	B2	105	90.8284	1081.16	60.2808	SCARB1
14	B2	106	91.1248	1133.18	76.1299	SCARB1
14	B2	107	91.4212	1226.63	76.926	SCARB1
14	B2	108	91.7177	1072.91	62.5588	SCARB1
14	B2	109	92.0141	1081.88	36.9695	SCARB1
14	B2	110	92.3105	1238.28	6.74316	SCARB1
14	B2	111	92.6069	691.07	-19.9587	SCARB1
14	B2	112	92.9033	1393.61	-34.9812	SCARB1
14	B2	113	93.1997	1504.8	-33.0022	SCARB1
14	B2	114	93.4961	1101.64	-14.5637	SCARB1
14	B2	115	93.7926	872.384	13.1882	SCARB1
14	B2	116	94.089	1208.12	39.5479	SCARB1
14	B2	117	94.3854	730.677	55.573	SCARB1
14	B2	118	94.6818	1008.39	58.1284	SCARB1
15	B3	1	60.0009	111548	2372.52	SCARB1
15	B3	2	60.2973	111433	2394.89	SCARB1
15	B3	3	60.5938	110505	2420.89	SCARB1
15	B3	4	60.8902	109835	2447.66	SCARB1
15	B3	5	61.1866	109525	2471.69	SCARB1
15	B3	6	61.4831	108426	2490.1	SCARB1
15	B3	7	61.7795	107926	2501.99	SCARB1
15	B3	8	62.0759	106838	2509.29	SCARB1
15	B3	9	62.3723	105939	2516.08	SCARB1
15	B3	10	62.6688	105585	2526.58	SCARB1
15	B3	11	62.9652	104639	2542.66	SCARB1
15	B3	12	63.2616	103848	2562.52	SCARB1
15	B3	13	63.5581	103069	2581.23	SCARB1
15	B3	14	63.8545	102298	2593.26	SCARB1
15	B3	15	64.1509	101251	2595.44	SCARB1
15	B3	16	64.4474	100481	2589.21	SCARB1
15	B3	17	64.7438	99402.9	2580.59	SCARB1
15	B3	18	65.0402	98726.6	2577.67	SCARB1
15	B3	19	65.3366	98068.9	2586.68	SCARB1
15	B3	20	65.6331	97401	2608.47	SCARB1
15	B3	21	65.9295	96367.8	2637.68	SCARB1
15	B3	22	66.2259	95699.8	2664.8	SCARB1
15	B3	23	66.5224	94826.5	2680.39	SCARB1
15	B3	24	66.8188	93546.5	2679.22	SCARB1
15	B3	25	67.1152	92499.9	2661.87	SCARB1
15	B3	26	67.4117	92174.6	2633.41	SCARB1
15	B3	27	67.7081	90936.5	2599.94	SCARB1
15	B3	28	68.0045	90380.3	2565.59	SCARB1
15	B3	29	68.301	89491.9	2531.57	SCARB1
15	B3	30	68.5974	88931.6	2497.73	SCARB1
15	B3	31	68.8938	87551.2	2464.61	SCARB1
15	B3	32	69.1902	87281.3	2434.24	SCARB1
15	B3	33	69.4867	86375.8	2409.06	SCARB1
15	B3	34	69.7831	85847.7	2389.94	SCARB1
15	B3	35	70.0795	85322.2	2375.52	SCARB1
15	B3	36	70.376	84105	2363.49	SCARB1
15	B3	37	70.6724	83439.3	2350.4	SCARB1
15	B3	38	70.9688	82873.7	2336.13	SCARB1
15	B3	39	71.2653	82080.6	2328.96	SCARB1
15	B3	40	71.5617	81656.7	2330.21	SCARB1
15	B3	41	71.8581	80778.6	2337.16	SCARB1
15	B3	42	72.1546	79998.1	2344.48	SCARB1
15	B3	43	72.451	79197.2	2347.53	SCARB1
15	B3	44	72.7474	78671.8	2345.42	SCARB1
15	B3	45	73.0438	77850.7	2341.03	SCARB1
15	B3	46	73.3403	77093.3	2338.92	SCARB1
15	B3	47	73.6367	76494.5	2342.34	SCARB1
15	B3	48	73.9331	75979.1	2351.54	SCARB1
15	B3	49	74.2296	75063.6	2360.75	SCARB1
15	B3	50	74.526	73978	2367.63	SCARB1
15	B3	51	74.8224	73823.1	2371.71	SCARB1
15	B3	52	75.1189	72996.8	2371.28	SCARB1
15	B3	53	75.4153	71968.2	2365.51	SCARB1
15	B3	54	75.7117	71428.1	2353.67	SCARB1
15	B3	55	76.0081	70530.7	2328.99	SCARB1
15	B3	56	76.3046	70219.1	2300.54	SCARB1
15	B3	57	76.601	69169.2	2270.45	SCARB1
15	B3	58	76.8974	68643.8	2240.06	SCARB1
15	B3	59	77.1939	67847.7	2211.16	SCARB1
15	B3	60	77.4903	66962.7	2187.09	SCARB1
15	B3	61	77.7867	66572.1	2172.15	SCARB1
15	B3	62	78.0832	66058.3	2169	SCARB1
15	B3	63	78.3796	65240.2	2176.13	SCARB1
15	B3	64	78.676	64703.9	2188.9	SCARB1
15	B3	65	78.9725	63926.5	2204.97	SCARB1
15	B3	66	79.2689	62850	2232.78	SCARB1
15	B3	67	79.5653	62375.8	2300.04	SCARB1
15	B3	68	79.8617	62336.2	2418.9	SCARB1
15	B3	69	80.1582	61239.5	2624.89	SCARB1
15	B3	70	80.4546	60468.9	3019.76	SCARB1
15	B3	71	80.751	59978.2	3706	SCARB1
15	B3	72	81.0475	58922.2	4790.65	SCARB1
15	B3	73	81.3439	58256.2	6341.3	SCARB1
15	B3	74	81.6403	56610.4	8322.54	SCARB1
15	B3	75	81.9368	54358.3	10540.5	SCARB1
15	B3	76	82.2332	49603.2	12638.2	SCARB1
15	B3	77	82.5296	37744.7	14171.3	SCARB1
15	B3	78	82.8261	21787.7	14753.6	SCARB1
15	B3	79	83.1225	11818.3	14207.8	SCARB1
15	B3	80	83.4189	8654.55	12642.4	SCARB1
15	B3	81	83.7153	7463.38	10409.6	SCARB1
15	B3	82	84.0118	6656.58	7966.75	SCARB1
15	B3	83	84.3082	6578.09	5718.17	SCARB1
15	B3	84	84.6046	6365.62	3910.63	SCARB1
15	B3	85	84.9011	6644.29	2614.93	SCARB1
15	B3	86	85.1975	6178.8	1378.14	SCARB1
15	B3	87	85.4939	6161.71	536.508	SCARB1
15	B3	88	85.7904	6095.9	73.5259	SCARB1
15	B3	89	86.0868	6536.46	-156.381	SCARB1
15	B3	90	86.3832	6618.73	-247.459	SCARB1
15	B3	91	86.6797	6224.91	-258.586	SCARB1
15	B3	92	86.9761	6199.01	-229.921	SCARB1
15	B3	93	87.2725	5999.76	-191.197	SCARB1
15	B3	94	87.5689	6227.65	-163.009	SCARB1
15	B3	95	87.8654	5862.38	-156.454	SCARB1
15	B3	96	88.1618	5963.88	-174.215	SCARB1
15	B3	97	88.4582	5904.79	-212.458	SCARB1
15	B3	98	88.7547	5696.59	-262.05	SCARB1
15	B3	99	89.0511	5710.15	-309.618	SCARB1
15	B3	100	89.3475	6179.24	-340.625	SCARB1
15	B3	101	89.644	6273.29	-345.04	SCARB1
15	B3	102	89.9404	5986.68	-322.718	SCARB1
15	B3	103	90.2368	5550.01	-284.147	SCARB1
15	B3	104	90.5332	6001.42	-245.27	SCARB1
15	B3	105	90.8297	5504.75	-219.888	SCARB1
15	B3	106	91.1261	5781.04	-215.052	SCARB1
15	B3	107	91.4225	6002.1	-231.482	SCARB1
15	B3	108	91.719	5176.1	-266.261	SCARB1
15	B3	109	92.0154	5732.15	-313.797	SCARB1
15	B3	110	92.3118	5438.5	-364.347	SCARB1
15	B3	111	92.6083	5770.83	-403.537	SCARB1
15	B3	112	92.9047	5954.58	-416.372	SCARB1
15	B3	113	93.2011	6078.82	-395.007	SCARB1
15	B3	114	93.4976	5668.28	-344.997	SCARB1
15	B3	115	93.794	5798.11	-284.566	SCARB1
15	B3	116	94.0904	5110.29	-236.128	SCARB1
15	B3	117	94.3869	5547.2	-215.166	SCARB1
15	B3	118	94.6833	5492.08	-223.575	SCARB1
16	B4	1	60.0009	113499	2738.01	SCARB1
16	B4	2	60.2973	112950	2736.33	SCARB1
16	B4	3	60.5938	112225	2736.91	SCARB1
16	B4	4	60.8902	111531	2738.65	SCARB1
16	B4	5	61.1866	110995	2741.88	SCARB1
16	B4	6	61.4831	109700	2748.56	SCARB1
16	B4	7	61.7795	108985	2760.9	SCARB1
16	B4	8	62.0759	108277	2778.81	SCARB1
16	B4	9	62.3723	107607	2797.97	SCARB1
16	B4	10	62.6688	106438	2810.39	SCARB1
16	B4	11	62.9652	105856	2807.94	SCARB1
16	B4	12	63.2616	104447	2786.85	SCARB1
16	B4	13	63.5581	103728	2750.41	SCARB1
16	B4	14	63.8545	102522	2707.97	SCARB1
16	B4	15	64.1509	101926	2670.56	SCARB1
16	B4	16	64.4474	101363	2645.87	SCARB1
16	B4	17	64.7438	100386	2635.31	SCARB1
16	B4	18	65.0402	99519.4	2634.54	SCARB1
16	B4	19	65.3366	98809.1	2636.39	SCARB1
16	B4	20	65.6331	98048.8	2634.47	SCARB1
16	B4	21	65.9295	96776.5	2625.34	SCARB1
16	B4	22	66.2259	96190.5	2608.81	SCARB1
16	B4	23	66.5224	95588.2	2587.13	SCARB1
16	B4	24	66.8188	94518.3	2564.05	SCARB1
16	B4	25	67.1152	93496.6	2543.99	SCARB1
16	B4	26	67.4117	93287.8	2531.26	SCARB1
16	B4	27	67.7081	91955.2	2528.8	SCARB1
16	B4	28	68.0045	91641.7	2536.87	SCARB1
16	B4	29	68.301	90867.4	2552.47	SCARB1
16	B4	30	68.5974	89854.9	2570.12	SCARB1
16	B4	31	68.8938	89157.9	2583.53	SCARB1
16	B4	32	69.1902	88315.6	2587.24	SCARB1
16	B4	33	69.4867	87302.4	2577.62	SCARB1
16	B4	34	69.7831	86959.3	2553.8	SCARB1
16	B4	35	70.0795	85849.7	2518.32	SCARB1
16	B4	36	70.376	84803.2	2477.43	SCARB1
16	B4	37	70.6724	84143.9	2439.57	SCARB1
16	B4	38	70.9688	83864.4	2411.92	SCARB1
16	B4	39	71.2653	82986.4	2392.87	SCARB1
16	B4	40	71.5617	82331	2383.84	SCARB1
16	B4	41	71.8581	81620.9	2377.26	SCARB1
16	B4	42	72.1546	80570.8	2365.76	SCARB1
16	B4	43	72.451	79783.1	2349.48	SCARB1
16	B4	44	72.7474	79382	2335.58	SCARB1
16	B4	45	73.0438	78831.1	2332.91	SCARB1
16	B4	46	73.3403	77883.6	2345.67	SCARB1
16	B4	47	73.6367	77569.5	2370.63	SCARB1
16	B4	48	73.9331	76516.6	2398.9	SCARB1
16	B4	49	74.2296	75589.5	2416.74	SCARB1
16	B4	50	74.526	75245	2423.54	SCARB1
16	B4	51	74.8224	74174.7	2421.1	SCARB1
16	B4	52	75.1189	73430.4	2412.06	SCARB1
16	B4	53	75.4153	72896.1	2397.46	SCARB1
16	B4	54	75.7117	72250.6	2379.73	SCARB1
16	B4	55	76.0081	71317.8	2361.2	SCARB1
16	B4	56	76.3046	70825.6	2339.41	SCARB1
16	B4	57	76.601	69881.9	2311.45	SCARB1
16	B4	58	76.8974	69101.6	2276.22	SCARB1
16	B4	59	77.1939	68612.2	2235.42	SCARB1
16	B4	60	77.4903	67772.3	2193.05	SCARB1
16	B4	61	77.7867	67213.1	2154.44	SCARB1
16	B4	62	78.0832	66701.3	2125.77	SCARB1
16	B4	63	78.3796	65754.1	2114.04	SCARB1
16	B4	64	78.676	65329.1	2126.9	SCARB1
16	B4	65	78.9725	64898.9	2171.56	SCARB1
16	B4	66	79.2689	64120.8	2254.89	SCARB1
16	B4	67	79.5653	63631.9	2387.7	SCARB1
16	B4	68	79.8617	62841	2542.72	SCARB1
16	B4	69	80.1582	61561.3	2791.25	SCARB1
16	B4	70	80.4546	61160.1	3220.35	SCARB1
16	B4	71	80.751	60277.3	3950	SCARB1
16	B4	72	81.0475	59443.8	5114.81	SCARB1
16	B4	73	81.3439	58704.9	6808.88	SCARB1
16	B4	74	81.6403	57441.9	9008.48	SCARB1
16	B4	75	81.9368	55105.3	11505.8	SCARB1
16	B4	76	82.2332	50281.9	13901	SCARB1
16	B4	77	82.5296	38584.3	15687.9	SCARB1
16	B4	78	82.8261	21679.6	16417.3	SCARB1
16	B4	79	83.1225	12344.6	15871	SCARB1
16	B4	80	83.4189	7882.68	14153.7	SCARB1
16	B4	81	83.7153	6557.04	11651.3	SCARB1
16	B4	82	84.0118	5883.35	8879.54	SCARB1
16	B4	83	84.3082	6018.33	6304.73	SCARB1
16	B4	84	84.6046	5689.58	4221.8	SCARB1
16	B4	85	84.9011	5787.08	2726.71	SCARB1
16	B4	86	85.1975	5783.01	1509.22	SCARB1
16	B4	87	85.4939	5543.77	729.765	SCARB1
16	B4	88	85.7904	5847.24	323.181	SCARB1
16	B4	89	86.0868	5577.39	133.463	SCARB1
16	B4	90	86.3832	5647.24	54.6143	SCARB1
16	B4	91	86.6797	5289.75	24.2039	SCARB1
16	B4	92	86.9761	5588.01	10.918	SCARB1
16	B4	93	87.2725	5428.85	2.80908	SCARB1
16	B4	94	87.5689	5456.58	-1.93994	SCARB1
16	B4	95	87.8654	5346.24	-1.58496	SCARB1
16	B4	96	88.1618	5375.86	5.20972	SCARB1
16	B4	97	88.4582	5322.7	17.6179	SCARB1
16	B4	98	88.7547	5207.89	32.4043	SCARB1
16	B4	99	89.0511	5325.37	44.6699	SCARB1
16	B4	100	89.3475	4953.71	49.3423	SCARB1
16	B4	101	89.644	4853.57	43.0046	SCARB1
16	B4	102	89.9404	5188.91	25.1689	SCARB1
16	B4	103	90.2368	4955.55	-1.75269	SCARB1
16	B4	104	90.5332	4968.74	-33.637	SCARB1
16	B4	105	90.8297	4647.9	-66.0972	SCARB1
16	B4	106	91.1261	5175.42	-95.4319	SCARB1
16	B4	107	91.4225	5192.93	-119.019	SCARB1
16	B4	108	91.719	4543.58	-135.317	SCARB1
16	B4	109	92.0154	5154.48	-143.458	SCARB1
16	B4	110	92.3118	5103.35	-142.618	SCARB1
16	B4	111	92.6083	4799.82	-131.931	SCARB1
16	B4	112	92.9047	5016.48	-111.658	SCARB1
16	B4	113	93.2011	5306.3	-85.083	SCARB1
16	B4	114	93.4976	4816.39	-59.2417	SCARB1
16	B4	115	93.794	4594.17	-42.7966	SCARB1
16	B4	116	94.0904	4645.77	-41.6345	SCARB1
16	B4	117	94.3869	4986.11	-55.1995	SCARB1
16	B4	118	94.6833	4873.14	-76.6038	SCARB1
17	B5	1	60.0015	110870	2067.56	SCARB1
17	B5	2	60.298	110654	2122.9	SCARB1
17	B5	3	60.5945	110078	2184.87	SCARB1
17	B5	4	60.8911	109677	2246.32	SCARB1
17	B5	5	61.1876	108886	2300.35	SCARB1
17	B5	6	61.4841	108138	2332.43	SCARB1
17	B5	7	61.7806	107198	2357.89	SCARB1
17	B5	8	62.0771	106659	2379.35	SCARB1
17	B5	9	62.3736	106267	2399.17	SCARB1
17	B5	10	62.6702	105202	2418.39	SCARB1
17	B5	11	62.9667	104340	2437.1	SCARB1
17	B5	12	63.2632	103631	2455.23	SCARB1
17	B5	13	63.5597	103204	2473.11	SCARB1
17	B5	14	63.8562	102030	2491.31	SCARB1
17	B5	15	64.1527	101247	2509.98	SCARB1
17	B5	16	64.4493	100579	2528.58	SCARB1
17	B5	17	64.7458	99984.6	2546.21	SCARB1
17	B5	18	65.0423	98840.4	2562.77	SCARB1
17	B5	19	65.3388	98097.2	2579.86	SCARB1
17	B5	20	65.6353	97255.5	2599.86	SCARB1
17	B5	21	65.9318	96211.8	2623.27	SCARB1
17	B5	22	66.2284	96069.2	2645.93	SCARB1
17	B5	23	66.5249	94974.5	2658.97	SCARB1
17	B5	24	66.8214	93879.5	2652.91	SCARB1
17	B5	25	67.1179	92713.6	2623.17	SCARB1
17	B5	26	67.4144	91908.8	2573.41	SCARB1
17	B5	27	67.711	91265.4	2514.28	SCARB1
17	B5	28	68.0075	90446.3	2458.69	SCARB1
17	B5	29	68.304	90056.9	2416.59	SCARB1
17	B5	30	68.6005	88864.6	2392.32	SCARB1
17	B5	31	68.897	88471.9	2384.78	SCARB1
17	B5	32	69.1935	87731.8	2388.97	SCARB1
17	B5	33	69.4901	87016.5	2397.94	SCARB1
17	B5	34	69.7866	85973.1	2404.63	SCARB1
17	B5	35	70.0831	85724.1	2403.57	SCARB1
17	B5	36	70.3796	84461.9	2392.67	SCARB1
17	B5	37	70.6761	83791	2373.97	SCARB1
17	B5	38	70.9726	83026.2	2352.55	SCARB1
17	B5	39	71.2692	82521.2	2333.9	SCARB1
17	B5	40	71.5657	81674.4	2320.85	SCARB1
17	B5	41	71.8622	81390.3	2312.48	SCARB1
17	B5	42	72.1587	80203.4	2305.67	SCARB1
17	B5	43	72.4552	79294.9	2297.29	SCARB1
17	B5	44	72.7518	79011.2	2285.91	SCARB1
17	B5	45	73.0483	78422.1	2277.26	SCARB1
17	B5	46	73.3448	77213.6	2274.95	SCARB1
17	B5	47	73.6413	77197.6	2279.56	SCARB1
17	B5	48	73.9378	76060.6	2287.9	SCARB1
17	B5	49	74.2343	75477.7	2295.09	SCARB1
17	B5	50	74.5309	74801.6	2297.97	SCARB1
17	B5	51	74.8274	73831.4	2297.41	SCARB1
17	B5	52	75.1239	73158.1	2297.6	SCARB1
17	B5	53	75.4204	72740	2301.74	SCARB1
17	B5	54	75.7169	72344.8	2308.56	SCARB1
17	B5	55	76.0134	71104	2314.9	SCARB1
17	B5	56	76.31	70305.3	2315.25	SCARB1
17	B5	57	76.6065	69854	2305.72	SCARB1
17	B5	58	76.903	68834.4	2280.95	SCARB1
17	B5	59	77.1995	68253.2	2244.35	SCARB1
17	B5	60	77.496	67789.2	2204.51	SCARB1
17	B5	61	77.7925	66755	2167.6	SCARB1
17	B5	62	78.0891	66321.1	2138.83	SCARB1
17	B5	63	78.3856	65686.3	2123.12	SCARB1
17	B5	64	78.6821	65115.5	2125.93	SCARB1
17	B5	65	78.9786	64197.7	2154.49	SCARB1
17	B5	66	79.2751	64108.9	2220.7	SCARB1
17	B5	67	79.5717	63216.4	2335.66	SCARB1
17	B5	68	79.8682	62216.4	2511.46	SCARB1
17	B5	69	80.1647	61685.1	2837.95	SCARB1
17	B5	70	80.4612	60927.5	3422.49	SCARB1
17	B5	71	80.7577	60312.9	4401.61	SCARB1
17	B5	72	81.0542	59385.2	5902.81	SCARB1
17	B5	73	81.3508	58411.9	7975.48	SCARB1
17	B5	74	81.6473	56438.6	10510.5	SCARB1
17	B5	75	81.9438	53412	13191.6	SCARB1
17	B5	76	82.2403	45077.7	15526.8	SCARB1
17	B5	77	82.5368	29091.2	16979.9	SCARB1
17	B5	78	82.8333	14199.5	17161	SCARB1
17	B5	79	83.1299	7919.69	15985.5	SCARB1
17	B5	80	83.4264	5087.4	13714	SCARB1
17	B5	81	83.7229	4920.75	10848.3	SCARB1
17	B5	82	84.0194	4324.85	7942.17	SCARB1
17	B5	83	84.3159	4544.32	5424.69	SCARB1
17	B5	84	84.6124	4508.43	3511.13	SCARB1
17	B5	85	84.909	4251.46	2184.54	SCARB1
17	B5	86	85.2055	4293.81	1103.31	SCARB1
17	B5	87	85.502	4236.05	504.936	SCARB1
17	B5	88	85.7985	4081.37	201.721	SCARB1
17	B5	89	86.095	4218.03	61.1133	SCARB1
17	B5	90	86.3916	4352.12	3.84863	SCARB1
17	B5	91	86.6881	3844.69	-12.4021	SCARB1
17	B5	92	86.9846	4008.31	-9.61816	SCARB1
17	B5	93	87.2811	4235.24	-0.420166	SCARB1
17	B5	94	87.5776	3842.68	6.5769	SCARB1
17	B5	95	87.8741	3704.6	5.21558	SCARB1
17	B5	96	88.1707	3943.37	-7.67554	SCARB1
17	B5	97	88.4672	3478.86	-31.1997	SCARB1
17	B5	98	88.7637	3980.02	-60.2451	SCARB1
17	B5	99	89.0602	3851.99	-87.0813	SCARB1
17	B5	100	89.3567	3656	-104.344	SCARB1
17	B5	101	89.6532	3620.41	-108.218	SCARB1
17	B5	102	89.9498	4281.66	-100.619	SCARB1
17	B5	103	90.2463	3505.23	-89.29	SCARB1
17	B5	104	90.5428	3656.1	-84.9917	SCARB1
17	B5	105	90.8393	3394.98	-96.1541	SCARB1
17	B5	106	91.1358	3286.17	-123.641	SCARB1
17	B5	107	91.4324	4244.34	-159.431	SCARB1
17	B5	108	91.7289	3578.41	-190.758	SCARB1
17	B5	109	92.0254	3772.46	-206.988	SCARB1
17	B5	110	92.3219	3745.05	-204.214	SCARB1
17	B5	111	92.6184	3771.55	-184.896	SCARB1
17	B5	112	92.9149	3585.03	-154.293	SCARB1
17	B5	113	93.2115	4003.08	-117.554	SCARB1
17	B5	114	93.508	3682.67	-79.4277	SCARB1
17	B5	115	93.8045	3552.51	-45.1882	SCARB1
17	B5	116	94.101	3397.3	-20.3049	SCARB1
17	B5	117	94.3975	3604.18	-8.23608	SCARB1
17	B5	118	94.694	3353.88	-8.2334	SCARB1
18	B6	1	60.0015	114529	2143.23	SCARB1
18	B6	2	60.298	114843	2199.21	SCARB1
18	B6	3	60.5945	113747	2276.55	SCARB1
18	B6	4	60.8911	113520	2344.35	SCARB1
18	B6	5	61.1876	112872	2399.4	SCARB1
18	B6	6	61.4841	112061	2438.5	SCARB1
18	B6	7	61.7806	111042	2453.72	SCARB1
18	B6	8	62.0771	110194	2445.85	SCARB1
18	B6	9	62.3736	109208	2424.73	SCARB1
18	B6	10	62.6702	108345	2405.06	SCARB1
18	B6	11	62.9667	108145	2399.61	SCARB1
18	B6	12	63.2632	107070	2413.52	SCARB1
18	B6	13	63.5597	106647	2442.76	SCARB1
18	B6	14	63.8562	105928	2477.12	SCARB1
18	B6	15	64.1527	104623	2506.04	SCARB1
18	B6	16	64.4493	104011	2523.61	SCARB1
18	B6	17	64.7458	102852	2530.74	SCARB1
18	B6	18	65.0423	102311	2533.7	SCARB1
18	B6	19	65.3388	101564	2540.45	SCARB1
18	B6	20	65.6353	100328	2556.5	SCARB1
18	B6	21	65.9318	99883.4	2581.94	SCARB1
18	B6	22	66.2284	99264.5	2610.73	SCARB1
18	B6	23	66.5249	98162.9	2632.99	SCARB1
18	B6	24	66.8214	97018.8	2639.32	SCARB1
18	B6	25	67.1179	96148.7	2624.75	SCARB1
18	B6	26	67.4144	95107.1	2590.5	SCARB1
18	B6	27	67.711	94447	2542.38	SCARB1
18	B6	28	68.0075	93486.2	2487.73	SCARB1
18	B6	29	68.304	92874.2	2432.96	SCARB1
18	B6	30	68.6005	92264.6	2383.31	SCARB1
18	B6	31	68.897	91013.9	2343.75	SCARB1
18	B6	32	69.1935	90495.6	2319.19	SCARB1
18	B6	33	69.4901	89849.8	2312.68	SCARB1
18	B6	34	69.7866	89461.5	2323.17	SCARB1
18	B6	35	70.0831	89165.6	2345	SCARB1
18	B6	36	70.3796	87237	2370.52	SCARB1
18	B6	37	70.6761	86582.9	2393.08	SCARB1
18	B6	38	70.9726	86444.5	2408.58	SCARB1
18	B6	39	71.2692	85689.5	2414.4	SCARB1
18	B6	40	71.5657	84381	2408.28	SCARB1
18	B6	41	71.8622	83788.7	2389.21	SCARB1
18	B6	42	72.1587	82866.9	2359.57	SCARB1
18	B6	43	72.4552	81937.4	2326.04	SCARB1
18	B6	44	72.7518	81705.5	2294.61	SCARB1
18	B6	45	73.0483	81198.3	2270.16	SCARB1
18	B6	46	73.3448	79868.2	2267.66	SCARB1
18	B6	47	73.6413	79728.4	2281.07	SCARB1
18	B6	48	73.9378	78914.3	2298.39	SCARB1
18	B6	49	74.2343	77922	2305.84	SCARB1
18	B6	50	74.5309	77166.9	2299.69	SCARB1
18	B6	51	74.8274	76343.8	2276.16	SCARB1
18	B6	52	75.1239	75936.1	2243.57	SCARB1
18	B6	53	75.4204	75034.4	2212.22	SCARB1
18	B6	54	75.7169	74306.5	2190.7	SCARB1
18	B6	55	76.0134	74010.1	2182.09	SCARB1
18	B6	56	76.31	73244.6	2183.15	SCARB1
18	B6	57	76.6065	72222.5	2186.86	SCARB1
18	B6	58	76.903	71653.1	2186.69	SCARB1
18	B6	59	77.1995	70671.3	2180.07	SCARB1
18	B6	60	77.496	70338.3	2169.05	SCARB1
18	B6	61	77.7925	69484.8	2158.24	SCARB1
18	B6	62	78.0891	69072.9	2152.41	SCARB1
18	B6	63	78.3856	67784.4	2155.44	SCARB1
18	B6	64	78.6821	67848.9	2171.49	SCARB1
18	B6	65	78.9786	66634.4	2208.09	SCARB1
18	B6	66	79.2751	66376.2	2281.52	SCARB1
18	B6	67	79.5717	65366.7	2383.94	SCARB1
18	B6	68	79.8682	64713.8	2568.87	SCARB1
18	B6	69	80.1647	64059.6	2917.93	SCARB1
18	B6	70	80.4612	63314.4	3539.9	SCARB1
18	B6	71	80.7577	62285	4564.61	SCARB1
18	B6	72	81.0542	61506.5	6100.99	SCARB1
18	B6	73	81.3508	60609.7	8167.79	SCARB1
18	B6	74	81.6473	58308.7	10620.1	SCARB1
18	B6	75	81.9438	54003	13117	SCARB1
18	B6	76	82.2403	44082.4	15172.8	SCARB1
18	B6	77	82.5368	26140.4	16299.8	SCARB1
18	B6	78	82.8333	13014	16188.2	SCARB1
18	B6	79	83.1299	7735.85	14834.7	SCARB1
18	B6	80	83.4264	5644.06	12546.5	SCARB1
18	B6	81	83.7229	5037.39	9818.33	SCARB1
18	B6	82	84.0194	4522.28	7150.09	SCARB1
18	B6	83	84.3159	4963.87	4898.48	SCARB1
18	B6	84	84.6124	4437.83	3218.65	SCARB1
18	B6	85	84.909	4276.67	1985.27	SCARB1
18	B6	86	85.2055	4384.63	948.409	SCARB1
18	B6	87	85.502	4347.1	378.455	SCARB1
18	B6	88	85.7985	4529.12	97.522	SCARB1
18	B6	89	86.095	4377.92	-21.8962	SCARB1
18	B6	90	86.3916	4194.08	-62.6028	SCARB1
18	B6	91	86.6881	4167.4	-74.7808	SCARB1
18	B6	92	86.9846	3799.24	-84.7578	SCARB1
18	B6	93	87.2811	4045.07	-100.665	SCARB1
18	B6	94	87.5776	4289.54	-118.737	SCARB1
18	B6	95	87.8741	4139.66	-131.618	SCARB1
18	B6	96	88.1707	3920	-135.981	SCARB1
18	B6	97	88.4672	3829.02	-135.696	SCARB1
18	B6	98	88.7637	4100.86	-139.247	SCARB1
18	B6	99	89.0602	3574.07	-153.793	SCARB1
18	B6	100	89.3567	3809.28	-179.872	SCARB1
18	B6	101	89.6532	3767.88	-209.909	SCARB1
18	B6	102	89.9498	4122.73	-231.423	SCARB1
18	B6	103	90.2463	3662.4	-233.584	SCARB1
18	B6	104	90.5428	4358.8	-213.964	SCARB1
18	B6	105	90.8393	3844.67	-181.616	SCARB1
18	B6	106	91.1358	3369.94	-153.888	SCARB1
18	B6	107	91.4324	3664.4	-147.825	SCARB1
18	B6	108	91.7289	3429.75	-170.636	SCARB1
18	B6	109	92.0254	3732.73	-214.956	SCARB1
18	B6	110	92.3219	3639.69	-262.013	SCARB1
18	B6	111	92.6184	3974.35	-291.182	SCARB1
18	B6	112	92.9149	3865.77	-290.604	SCARB1
18	B6	113	93.2115	4133.91	-262.942	SCARB1
18	B6	114	93.508	3276.52	-223.097	SCARB1
18	B6	115	93.8045	3526.94	-189.363	SCARB1
18	B6	116	94.101	3543.76	-173.522	SCARB1
18	B6	117	94.3975	3805.94	-175.94	SCARB1
18	B6	118	94.694	3644.5	-188.035	SCARB1
19	B7	1	60.0012	112988	1873.52	SCARB1
19	B7	2	60.2976	112231	1949.67	SCARB1
19	B7	3	60.5941	111783	2023.47	SCARB1
19	B7	4	60.8905	111269	2086.71	SCARB1
19	B7	5	61.1869	110746	2133.66	SCARB1
19	B7	6	61.4834	109775	2163.3	SCARB1
19	B7	7	61.7798	109274	2179.69	SCARB1
19	B7	8	62.0762	108595	2191.19	SCARB1
19	B7	9	62.3727	107746	2208.08	SCARB1
19	B7	10	62.6691	107293	2239.62	SCARB1
19	B7	11	62.9655	106400	2291.05	SCARB1
19	B7	12	63.262	106071	2341.51	SCARB1
19	B7	13	63.5584	105119	2398.7	SCARB1
19	B7	14	63.8548	104302	2457.45	SCARB1
19	B7	15	64.1513	103852	2510.31	SCARB1
19	B7	16	64.4477	102476	2551.79	SCARB1
19	B7	17	64.7441	101790	2579.46	SCARB1
19	B7	18	65.0406	100862	2593.67	SCARB1
19	B7	19	65.337	100231	2596.66	SCARB1
19	B7	20	65.6334	99141.6	2591.66	SCARB1
19	B7	21	65.9298	98258.8	2582.23	SCARB1
19	B7	22	66.2263	97375.2	2571.3	SCARB1
19	B7	23	66.5227	96637.8	2559.86	SCARB1
19	B7	24	66.8191	95934.3	2546.28	SCARB1
19	B7	25	67.1156	94988.2	2527.06	SCARB1
19	B7	26	67.412	93997.8	2499.46	SCARB1
19	B7	27	67.7084	93174.7	2464.31	SCARB1
19	B7	28	68.0049	92346.9	2426.77	SCARB1
19	B7	29	68.3013	91610.7	2394.25	SCARB1
19	B7	30	68.5977	90924.3	2372.45	SCARB1
19	B7	31	68.8942	90668.4	2362.05	SCARB1
19	B7	32	69.1906	89439.9	2358.46	SCARB1
19	B7	33	69.487	88905.4	2354.75	SCARB1
19	B7	34	69.7835	87884.2	2345.63	SCARB1
19	B7	35	70.0799	87214.4	2330.09	SCARB1
19	B7	36	70.3763	86486.7	2311.18	SCARB1
19	B7	37	70.6728	85836.7	2292.16	SCARB1
19	B7	38	70.9692	85237.6	2275.27	SCARB1
19	B7	39	71.2656	84446.5	2270.25	SCARB1
19	B7	40	71.5621	83421.8	2277.38	SCARB1
19	B7	41	71.8585	83345.8	2294.36	SCARB1
19	B7	42	72.1549	82133.5	2310.53	SCARB1
19	B7	43	72.4514	81718.6	2325.19	SCARB1
19	B7	44	72.7478	80821.4	2335.12	SCARB1
19	B7	45	73.0442	79938.4	2337.51	SCARB1
19	B7	46	73.3407	79171.9	2331.91	SCARB1
19	B7	47	73.6371	78887	2320.52	SCARB1
19	B7	48	73.9335	77660.9	2307.74	SCARB1
19	B7	49	74.23	76941.1	2298.79	SCARB1
19	B7	50	74.5264	76451.4	2297.81	SCARB1
19	B7	51	74.8228	75881.4	2305.52	SCARB1
19	B7	52	75.1193	75294.1	2318.25	SCARB1
19	B7	53	75.4157	74025.6	2328.96	SCARB1
19	B7	54	75.7121	73591.6	2330.43	SCARB1
19	B7	55	76.0086	72784	2318.72	SCARB1
19	B7	56	76.305	71644.1	2293.9	SCARB1
19	B7	57	76.6014	71488.9	2250.09	SCARB1
19	B7	58	76.8978	70576.8	2208.98	SCARB1
19	B7	59	77.1943	69754.1	2182.14	SCARB1
19	B7	60	77.4907	69195.1	2177.01	SCARB1
19	B7	61	77.7871	68573.1	2194.21	SCARB1
19	B7	62	78.0836	68471	2227.01	SCARB1
19	B7	63	78.38	67077.5	2264.34	SCARB1
19	B7	64	78.6764	66105.5	2296.95	SCARB1
19	B7	65	78.9729	65533.4	2315.86	SCARB1
19	B7	66	79.2693	65250.5	2340.36	SCARB1
19	B7	67	79.5657	64360.2	2392.43	SCARB1
19	B7	68	79.8622	63430.7	2511.43	SCARB1
19	B7	69	80.1586	62727.4	2761.64	SCARB1
19	B7	70	80.455	62245.6	3238.73	SCARB1
19	B7	71	80.7515	61450.5	4065.4	SCARB1
19	B7	72	81.0479	60467.7	5363.86	SCARB1
19	B7	73	81.3443	59484.4	7199.15	SCARB1
19	B7	74	81.6408	57739.1	9504.85	SCARB1
19	B7	75	81.9372	55186.2	12026.6	SCARB1
19	B7	76	82.2336	49028.6	14331.4	SCARB1
19	B7	77	82.5301	34020.9	15910.8	SCARB1
19	B7	78	82.8265	16574.7	16354	SCARB1
19	B7	79	83.1229	8646.17	15511.8	SCARB1
19	B7	80	83.4194	4920.62	13562.9	SCARB1
19	B7	81	83.7158	3817.36	10942.9	SCARB1
19	B7	82	84.0122	3441.21	8176.55	SCARB1
19	B7	83	84.3087	3550.57	5701.99	SCARB1
19	B7	84	84.6051	3702.28	3767.57	SCARB1
19	B7	85	84.9015	3344.28	2425.08	SCARB1
19	B7	86	85.198	3303.42	1267	SCARB1
19	B7	87	85.4944	3387.23	590.097	SCARB1
19	B7	88	85.7908	3426.7	256.755	SCARB1
19	B7	89	86.0872	3356.96	117.032	SCARB1
19	B7	90	86.3837	3276.74	71.3777	SCARB1
19	B7	91	86.6801	3134.81	59.1816	SCARB1
19	B7	92	86.9765	2941.97	46.8984	SCARB1
19	B7	93	87.273	2777.66	20.738	SCARB1
19	B7	94	87.5694	3067.41	-18.2092	SCARB1
19	B7	95	87.8658	2961.45	-59.8318	SCARB1
19	B7	96	88.1623	3148.14	-92.4675	SCARB1
19	B7	97	88.4587	3164	-109.381	SCARB1
19	B7	98	88.7551	2781.06	-111.123	SCARB1
19	B7	99	89.0516	3103.92	-103.095	SCARB1
19	B7	100	89.348	2822.39	-90.8223	SCARB1
19	B7	101	89.6444	3034.68	-76.6758	SCARB1
19	B7	102	89.9409	2922.45	-60.1555	SCARB1
19	B7	103	90.2373	2986.15	-40.8782	SCARB1
19	B7	104	90.5337	2854.98	-21.4626	SCARB1
19	B7	105	90.8302	2766.76	-7.78491	SCARB1
19	B7	106	91.1266	2544.21	-6.21899	SCARB1
19	B7	107	91.423	2635.78	-19.7517	SCARB1
19	B7	108	91.7195	2625.31	-45.6787	SCARB1
19	B7	109	92.0159	2814.82	-76.3726	SCARB1
19	B7	110	92.3123	2569.9	-102.487	SCARB1
19	B7	111	92.6088	2728.82	-116.628	SCARB1
19	B7	112	92.9052	2668.93	-115.851	SCARB1
19	B7	113	93.2016	2823.66	-102.478	SCARB1
19	B7	114	93.4981	2725.55	-83.2688	SCARB1
19	B7	115	93.7945	2384.42	-67.0203	SCARB1
19	B7	116	94.0909	2370.8	-61.031	SCARB1
19	B7	117	94.3874	2746.97	-67.9556	SCARB1
19	B7	118	94.6838	2444.14	-84.9624	SCARB1
20	B8	1	60.0012	110539	2212.69	SCARB1
20	B8	2	60.2976	110425	2253.13	SCARB1
20	B8	3	60.5941	109668	2290.57	SCARB1
20	B8	4	60.8905	108992	2316.78	SCARB1
20	B8	5	61.1869	108230	2330.78	SCARB1
20	B8	6	61.4834	107652	2340.5	SCARB1
20	B8	7	61.7798	107086	2349.11	SCARB1
20	B8	8	62.0762	106465	2360.06	SCARB1
20	B8	9	62.3727	105527	2376.21	SCARB1
20	B8	10	62.6691	104777	2398.82	SCARB1
20	B8	11	62.9655	104175	2426.34	SCARB1
20	B8	12	63.262	103777	2454.16	SCARB1
20	B8	13	63.5584	102918	2476.03	SCARB1
20	B8	14	63.8548	101528	2487.15	SCARB1
20	B8	15	64.1513	101301	2486.92	SCARB1
20	B8	16	64.4477	100090	2479.52	SCARB1
20	B8	17	64.7441	99676.6	2471.99	SCARB1
20	B8	18	65.0406	98471	2470.97	SCARB1
20	B8	19	65.337	98429.1	2479.97	SCARB1
20	B8	20	65.6334	97260.4	2498.79	SCARB1
20	B8	21	65.9298	96583.3	2524.33	SCARB1
20	B8	22	66.2263	95741.6	2552.22	SCARB1
20	B8	23	66.5227	94852.8	2577.72	SCARB1
20	B8	24	66.8191	94170.8	2596.11	SCARB1
20	B8	25	67.1156	93407.6	2603.13	SCARB1
20	B8	26	67.412	92415	2596.29	SCARB1
20	B8	27	67.7084	91192.4	2575.97	SCARB1
20	B8	28	68.0049	90727.1	2545.67	SCARB1
20	B8	29	68.3013	90107.6	2510.8	SCARB1
20	B8	30	68.5977	89168.3	2476.69	SCARB1
20	B8	31	68.8942	88249.5	2447.27	SCARB1
20	B8	32	69.1906	87906.2	2424.65	SCARB1
20	B8	33	69.487	87015.9	2409.5	SCARB1
20	B8	34	69.7835	86268.5	2401.5	SCARB1
20	B8	35	70.0799	85609.5	2399.62	SCARB1
20	B8	36	70.3763	84858.8	2401.95	SCARB1
20	B8	37	70.6728	84171.3	2405.58	SCARB1
20	B8	38	70.9692	83442.4	2406.83	SCARB1
20	B8	39	71.2656	82690.8	2402.07	SCARB1
20	B8	40	71.5621	81804.4	2389.11	SCARB1
20	B8	41	71.8585	81111.4	2368.3	SCARB1
20	B8	42	72.1549	80400.4	2342.74	SCARB1
20	B8	43	72.4514	79691.4	2317.41	SCARB1
20	B8	44	72.7478	79282.5	2291.56	SCARB1
20	B8	45	73.0442	78264.6	2275.24	SCARB1
20	B8	46	73.3407	77699.3	2272.98	SCARB1
20	B8	47	73.6371	77591.2	2280.39	SCARB1
20	B8	48	73.9335	76170.7	2289.49	SCARB1
20	B8	49	74.23	75858.9	2292.38	SCARB1
20	B8	50	74.5264	74875.9	2285.3	SCARB1
20	B8	51	74.8228	74391.2	2271.06	SCARB1
20	B8	52	75.1193	73415.6	2257.67	SCARB1
20	B8	53	75.4157	73122.1	2253.81	SCARB1
20	B8	54	75.7121	72561.3	2263.62	SCARB1
20	B8	55	76.0086	71974.7	2283.96	SCARB1
20	B8	56	76.305	70777.4	2305.95	SCARB1
20	B8	57	76.6014	70383.1	2316.34	SCARB1
20	B8	58	76.8978	69521.4	2315.81	SCARB1
20	B8	59	77.1943	68862.3	2303.67	SCARB1
20	B8	60	77.4907	67696.2	2279.42	SCARB1
20	B8	61	77.7871	67941.8	2253.58	SCARB1
20	B8	62	78.0836	66774.1	2232.94	SCARB1
20	B8	63	78.38	66135.6	2222.63	SCARB1
20	B8	64	78.6764	65392.3	2227.23	SCARB1
20	B8	65	78.9729	65045	2252.77	SCARB1
[truncated: 6,543 more rows]

## Sheet: Melt Curve Result
Block Type	96-Well 0.2-mL Block
Calibration Background is expired	Yes
Calibration Background performed on	06-16-2022
Calibration Pure Dye ABY is expired	Yes
Calibration Pure Dye ABY performed on	06-16-2022
Calibration Pure Dye CY5 is expired	Yes
Calibration Pure Dye CY5 performed on	06-16-2022
Calibration Pure Dye FAM is expired	Yes
Calibration Pure Dye FAM performed on	06-16-2022
Calibration Pure Dye JUN is expired	Yes
Calibration Pure Dye JUN performed on	06-16-2022
Calibration Pure Dye MUSTANG PURPLE is expired	Yes
Calibration Pure Dye MUSTANG PURPLE performed on	06-16-2022
Calibration Pure Dye NED is expired	Yes
Calibration Pure Dye NED performed on	06-16-2022
Calibration Pure Dye ROX is expired	Yes
Calibration Pure Dye ROX performed on	06-16-2022
Calibration Pure Dye SYBR is expired	Yes
Calibration Pure Dye SYBR performed on	06-16-2022
Calibration Pure Dye TAMRA is expired	Yes
Calibration Pure Dye TAMRA performed on	06-16-2022
Calibration Pure Dye VIC is expired	Yes
Calibration Pure Dye VIC performed on	06-16-2022
Calibration ROI is expired	Yes
Calibration ROI performed on	06-16-2022
Calibration Uniformity is expired	Yes
Calibration Uniformity performed on	06-16-2022
Chemistry	SYBR_GREEN
Date Created	2024-09-07 20:45:28 PM CST
Experiment Barcode
Experiment Comment
Experiment File Name	D:\SQF\2024-09-07_SQF_qPCR_.eds
Experiment Name	2024-09-07_SQF_qPCR_
Experiment Run End Time	2024-09-07 20:42:23 PM CST
Experiment Type	Standard Curve
Instrument Name	2765222065148
Instrument Serial Number	2765222065148
Instrument Type	QuantStudio™ 5 System
Passive Reference	ROX
Post-read Stage/Step
Pre-read Stage/Step
Quantification Cycle Method	Ct
Signal Smoothing On	true
Stage where Melt Analysis is performed	Stage3
Stage/ Cycle where Ct Analysis is performed	Stage2, Step2
User Name
Well	Well Position	Sample	Target Name	Tm	Melt Peak Height
1	A1	10A	GAPD	86.975	9368.5
2	A2	10A	GAPD	86.975	7555.62
3	A3	10A	GAPD	87.1243	9239.33
4	A4	10A	GAPD	87.1243	9610.39
5	A5	231	GAPD	86.9846	8373.26
6	A6	231	GAPD	86.9846	8770.12
7	A7	231	GAPD	86.9765	9310.04
8	A8	231	GAPD	86.9765	9505.27
9	A9	10A	GAPD	86.8308	9823.72
13	B1	10A	SCARB1	82.677	14912.9
14	B2	10A	SCARB1	82.677	13788.6
15	B3	10A	SCARB1	82.8261	14753.6
16	B4	10A	SCARB1	82.8261	16417.3
17	B5	231	SCARB1	82.6851	17243.1
18	B6	231	SCARB1	82.6851	16406.9
19	B7	231	SCARB1	82.8265	16354
20	B8	231	SCARB1	82.8265	16007.4
21	B9	10A	GAPD	86.6826	9983.44
25	C1	10A	SEPTIN3	76.7488	7558.07
25	C1	10A	SEPTIN3	85.9376	5917.16
26	C2	10A	SEPTIN3	83.7145	8351.49
26	C2	10A	SEPTIN3	79.8611	6453.95
27	C3	10A	SEPTIN3	78.2314	11209
28	C4	10A	SEPTIN3	86.0868	6954.97
28	C4	10A	SEPTIN3	78.2314	4808.1
29	C5	231	SEPTIN3	76.4582	8974.12
29	C5	231	SEPTIN3	86.095	7941.87
30	C6	231	SEPTIN3	82.092	8810.23
30	C6	231	SEPTIN3	76.0134	5333.15
30	C6	231	SEPTIN3	86.095	3980.31
31	C7	231	SEPTIN3	86.0872	9981.94
31	C7	231	SEPTIN3	78.0836	6529.75
31	C7	231	SEPTIN3	82.6783	6137.95
32	C8	231	SEPTIN3	76.305	7082.86
32	C8	231	SEPTIN3	86.0872	7880.01
32	C8	231	SEPTIN3	83.2711	5891.28
33	C9	10A	GAPD	86.6826	7737.52
37	D1	10A	CHML	80.4539	15492.2
38	D2	10A	CHML	80.6021	16110.5
39	D3	10A	CHML	80.751	15934.9
40	D4	10A	CHML	80.6028	16549.4
41	D5	231	CHML	80.4612	16979.7
42	D6	231	CHML	80.6095	15008.8
43	D7	231	CHML	80.6032	17590.8
44	D8	231	CHML	80.6032	15132.1
45	D9	10A	GAPD	86.5343	8731.76
49	E1	10A	COL5A3	83.7145	13811.1
50	E2	10A	COL5A3	83.7145	13681.8
50	E2	10A	COL5A3	75.4149	4137.07
51	E3	10A	COL5A3	83.8636	14579.3
51	E3	10A	COL5A3	75.7117	4048.87
52	E4	10A	COL5A3	83.8636	12716.9
52	E4	10A	COL5A3	75.7117	4341.81
53	E5	231	COL5A3	76.4582	14698.8
54	E6	231	COL5A3	76.7547	12962.9
54	E6	231	COL5A3	66.5249	2731.96
54	E6	231	COL5A3	61.0393	2664.96
54	E6	231	COL5A3	87.5776	-52.417
54	E6	231	COL5A3	84.6124	-72.1592
55	E7	231	COL5A3	76.4532	18448.5
56	E8	231	COL5A3	78.2318	12602.6
57	E9	231	GAPD	86.5343	9237.42
61	F1	10A	SYNM	79.5647	16721.5
62	F2	10A	SYNM	79.8611	11174.9
63	F3	10A	SYNM	79.1207	19957.7
64	F4	10A	SYNM	78.9725	15877.1
64	F4	10A	SYNM	83.7153	8756.44
65	F5	231	SYNM	78.9786	16706.6
66	F6	231	SYNM	78.9786	19442.5
67	F7	231	SYNM	78.9729	17348.1
68	F8	231	SYNM	78.8247	12966.8
69	F9	231	GAPD	86.5343	9512.87
73	G1	10A	STAB1	77.1934	7861.46
73	G1	10A	STAB1	83.7145	4916
74	G2	10A	STAB1	82.8252	8698.13
74	G2	10A	STAB1	76.897	5333.14
75	G3	10A	STAB1	80.6028	9415.88
75	G3	10A	STAB1	65.7813	3700.12
76	G4	10A	STAB1	77.6385	9999.2
76	G4	10A	STAB1	82.3814	7124.92
77	G5	231	STAB1	78.9786	9589.3
78	G6	231	STAB1	85.2055	8639.67
79	G7	231	STAB1	77.3425	10943.5
79	G7	231	STAB1	82.8265	4046.37
80	G8	231	STAB1	77.1943	7112.36
80	G8	231	STAB1	88.3105	2492.69
81	G9	231	GAPD	86.6826	8574.05
85	H1	10A	PINK1	91.8659	6764.52
85	H1	10A	PINK1	80.6021	2359.65
86	H2	10A	PINK1	91.8659	7405.5
86	H2	10A	PINK1	80.8986	2811.98
87	H3	10A	PINK1	92.0154	8407.14
88	H4	10A	PINK1	92.0154	8160.1
88	H4	10A	PINK1	80.1582	2718.21
89	H5	231	PINK1	92.0254	7677.47
90	H6	231	PINK1	92.0254	8407.68
91	H7	231	PINK1	91.7195	9163.77
91	H7	231	PINK1	80.1586	2209.66
92	H8	231	PINK1	91.7195	9742.16
93	H9	231	GAPD	86.8308	8329.65
